# Supplementary material for: WRKY transcription factor family in lettuce plant (Lactuca sativa): Genome-wide characterization, chromosome location, phylogeny structures, and expression patterns
Source: PeerJ. 2022 Oct 18;10:e14136. doi: 10.7717/peerj.14136 (PMC9586095; doi:10.7717/peerj.14136)
Supplement: Supplemental Information 1 [file peerj-10-14136-s004.xlsx]

## Sheet: Table S1
Table S1 Primer sequences used in the text
Gene Number	Gene ID	Forward primer (5'→3')	Reverse primer (5'→3')
LsWRKY09	Lsat_1_v5_gn_2_126920.1	GGAAGGACCTGACGCTAGGAGTAA	AGTGTTTGAAGGTGAGCATGTGTGA
LsWRKY12	Lsat_1_v5_gn_3_139241.1	GCAGATTCCGATTCCAAGAATGTCT	GATTTGAAGCTAAACCCACGTTCCA
LsWRKY39	Lsat_1_v5_gn_6_84341.2	GACGGTTATAGTTGGAGGAAGTATG	GTGGTGGTGGTTGGTGGTT
LsWRKY51	Lsat_1_v5_gn_7_77361.2	AGCAAGTGAAAGTGAGCCTGGAAAT	CGGTTGTGGATGAAGGATGATTGGT
LsWRKY58	Lsat_1_v5_gn_8_6060.1	CATTACCATTACCATCGTCATCATC	TCGTTACCATCGGAAGTGCTA
LsWRKY69	Lsat_1_v5_gn_9_38660.1	CGGAGATCAATAGCCACAGACAAGA	GTTTGGTTGCTTGACATCCTTGGT
LsWRKY70	Lsat_1_v5_gn_9_38680.1	CTTAATGCGAACCACCAGAGGAGTT	CCCACGATCCAACCCAGAATAAGC
LsWRKY71	Lsat_1_v5_gn_9_39381.1	AACCAGCATCTTGAGATTCCGACAA	GCCAACTCGTGTCCTCGCTATG
LsWRKY72	Lsat_1_v5_gn_9_39460.1	AGTTCCTGATATGCCGATTGGTGAT	TGTGGTGGCTCATCTTCAGTCATT
LsWRKY75	Lsat_1_v5_gn_9_60201.2	GGCTGTGAAGGATCGGAGAGGAT	GGCTGCTTGGTAAATTGTTGGTGTT
LsTIP41	Lsat_1_v5_gn_5_116421	GAGAGATTTGCTGGAGGGAAACTA	CCTTTGACTGATGATGTTTGGA

## Sheet: Table S2
Table S2 Characteristic features of LsWRKY TFs. The red box represented the newly identified WRKY transcription factor.
Group	Gene ID	Name	Open reading frame length (bp)	Size (aa)	Mw (kD)	pI	Positive amino acid (%)	Negative amino acid (%)	Aliphatic amino acids (%)	Aromatic	Grand average of hydropathicity
										amino acids (%)
I	LsWRKY01	Lsat_1_v5_gn_0_15201.1	1533	510	56.2	8.3	11.2	10.6	55.96	7.2	-0.881
I	LsWRKY06	Lsat_1_v5_gn_2_110080.1	1062	353	39.8	9.63	16.1	10.4	65.1	6.8	-0.809
I	LsWRKY17	Lsat_1_v5_gn_3_98441.1	1101	366	41.2	8.65	13.1	11.8	78.47	7.9	-0.758
I	LsWRKY18	Lsat_1_v5_gn_4_10320.1	1209	402	44.4	8.8	13.5	11.9	62.09	7.2	-0.809
I	LsWRKY24	Lsat_1_v5_gn_4_169921.3	1539	512	56.7	9.04	11.9	10.2	54.08	7.2	-0.867
I	LsWRKY30	Lsat_1_v5_gn_5_122901.1	1155	384	42.2	6.76	11.4	12	60.36	4.7	-0.991
I	LsWRKY32	Lsat_1_v5_gn_5_173860.1	1485	494	55.2	8.15	11	10.6	53.44	8.6	-0.923
I	LsWRKY41	Lsat_1_v5_gn_7_113921.1	1434	477	52.8	6.44	11.8	12.6	56.35	7.5	-0.947
I	LsWRKY42	Lsat_1_v5_gn_7_115881.3	2232	743	81.7	6.29	9.2	10.9	49.33	8.2	-0.845
I	LsWRKY48	Lsat_1_v5_gn_7_49760.3	1434	477	52.8	8.55	13.8	12.8	72.71	4.8	-0.736
I	LsWRKY53	Lsat_1_v5_gn_8_103681.3	1659	552	60.9	9.4	9.8	10.5	48.79	9.4	-0.852
I	LsWRKY57	Lsat_1_v5_gn_8_48640.1	1533	510	55.6	7.38	10.4	10.4	52.76	6.4	-0.934
I	LsWRKY59	Lsat_1_v5_gn_8_63280.1	1176	391	43.4	8.61	13.8	12.5	60.84	4.9	-0.954
I	LsWRKY63	Lsat_1_v5_gn_9_104500.3	1035	344	39	6.25	14	15.7	47.21	6.7	-1.274
I	LsWRKY65	Lsat_1_v5_gn_9_14580.1	1614	537	59.9	7.27	11.2	11.2	50.69	8.6	-0.96
I	LsWRKY68	Lsat_1_v5_gn_9_36381.1	1383	460	53	8.88	12.6	10.9	50.41	11.6	-1.019
I	LsWRKY74	Lsat_1_v5_gn_9_49041.1	1989	662	74.3	5.71	12	14.3	57.99	7.6	-0.909
IIa	LsWRKY13	Lsat_1_v5_gn_3_25221.1	816	271	31.2	5.38	14.8	18.4	64.69	7.8	-0.969
IIa	LsWRKY28	Lsat_1_v5_gn_4_86881.3	1098	365	40.5	6.68	10.6	10.9	74.25	5.7	-0.627
IIa	LsWRKY34	Lsat_1_v5_gn_5_62060.1	720	239	27.8	6.4	15.5	16.3	66.82	8	-0.892
IIb	LsWRKY15	Lsat_1_v5_gn_3_51361.1	1338	445	49.2	8.87	10.5	8.8	55.46	7.4	-0.757
IIb	LsWRKY27	Lsat_1_v5_gn_4_61461.1	1485	494	54	8.82	9	8.1	64.26	4.2	-0.583
IIb	LsWRKY29	Lsat_1_v5_gn_5_107761.1	1500	499	55.6	5.85	10.4	12.8	56.89	5	-0.934
IIb	LsWRKY31	Lsat_1_v5_gn_5_124140.1	1524	507	54.8	7	9.6	9.8	65.9	5.6	-0.622
IIb	LsWRKY33	Lsat_1_v5_gn_5_18720.1	1656	551	60.3	6.51	9.6	10.1	57.21	5.4	-0.813
IIb	LsWRKY40	Lsat_1_v5_gn_7_111140.1	1317	438	48.9	8.84	10.3	8.9	75.27	5	-0.494
IIb	LsWRKY43	Lsat_1_v5_gn_7_15520.1	1530	509	56.2	5.98	8.4	10.4	68.45	5.3	-0.587
IIb	LsWRKY52	Lsat_1_v5_gn_7_92541.1	2223	740	79.4	8.47	9.3	8.8	64.12	4.3	-0.614
IIb	LsWRKY64	Lsat_1_v5_gn_9_106981.1	1530	509	55.2	6.08	9.4	10.5	68.4	4.3	-0.635
IIc	LsWRKY02	Lsat_1_v5_gn_0_3061.1	546	181	20.7	7	12.2	12.1	72.04	10	-0.588
IIc	LsWRKY04	Lsat_1_v5_gn_1_80260.1	1218	405	46.2	6.22	9.6	11.3	54.15	11.8	-0.879
IIc	LsWRKY05	Lsat_1_v5_gn_1_82341.1	666	221	25.8	7.75	14	13.5	45.38	8.6	-1.152
IIc	LsWRKY11	Lsat_1_v5_gn_3_11440.1	615	204	23.1	8.64	11.3	9.8	66.86	6.4	-0.835
IIc	LsWRKY14	Lsat_1_v5_gn_3_31320.1	591	196	22.1	9.1	12.3	9.7	55.71	8.1	-0.949
IIc	LsWRKY19	Lsat_1_v5_gn_4_1201.1	621	206	23.3	9.01	13.1	10.7	55.39	8.7	-0.933
IIc	LsWRKY20	Lsat_1_v5_gn_4_12300.1	918	305	33.5	7.76	12.1	11.8	55.25	7.6	-0.794
IIc	LsWRKY22	Lsat_1_v5_gn_4_138020.1	600	199	23.2	9.35	14.5	10.5	59.25	9.5	-0.889
IIc	LsWRKY36	Lsat_1_v5_gn_6_115920.1	906	301	33.3	7.66	10.3	10	54.72	8.3	-0.765
IIc	LsWRKY38	Lsat_1_v5_gn_6_220.3	1074	357	39.6	5.79	10.1	12.3	52.41	7.9	-0.955
IIc	LsWRKY46	Lsat_1_v5_gn_7_34280.1	1005	334	37.1	6.18	9.9	11.4	43.74	9.9	-0.933
IIc	LsWRKY50	Lsat_1_v5_gn_7_60801.3	588	195	22.5	6.71	12.8	13.3	48.46	11.8	-1.048
IIc	LsWRKY54	Lsat_1_v5_gn_8_147781.1	612	203	22.9	8.48	12.9	11.3	62.81	8.8	-0.781
IIc	LsWRKY55	Lsat_1_v5_gn_8_166820.1	903	300	33.6	6.33	9.7	11.7	53.3	6.9	-0.794
IIc	LsWRKY56	Lsat_1_v5_gn_8_47440.1	1101	367	41	7.11	10.9	11.2	64.5	8.2	-0.702
IIc	LsWRKY67	Lsat_1_v5_gn_9_33061.1	861	286	32.5	5.21	10.1	13.2	59.3	9.7	-0.769
IIc	LsWRKY73	Lsat_1_v5_gn_9_42560.2	723	241	27.6	8.12	10	9.1	60.33	10.7	-0.756
IId	LsWRKY03	Lsat_1_v5_gn_1_22221.1	1020	339	36.8	9.62	12.7	8.2	63.63	6.2	-0.512
IId	LsWRKY21	Lsat_1_v5_gn_4_127960.2	1056	351	38.1	9.6	11.7	7.4	60.88	5.7	-0.586
IId	LsWRKY23	Lsat_1_v5_gn_4_164440.1	969	322	35	9.52	13.9	9	66.65	5.3	-0.589
IId	LsWRKY35	Lsat_1_v5_gn_5_84140.1	819	272	29.9	9.98	16.2	9.2	67.02	5.5	-0.694
IId	LsWRKY49	Lsat_1_v5_gn_7_55280.1	843	280	30.4	9.73	15.4	8.9	60.21	5.4	-0.709
IId	LsWRKY61	Lsat_1_v5_gn_8_68740.2	813	270	29.2	9.89	14.1	7.7	59.22	5.6	-0.604
IId	LsWRKY62	Lsat_1_v5_gn_8_91621.1	1020	339	37.7	9.64	13.3	7.6	71.3	7.2	-0.654
IId	LsWRKY66	Lsat_1_v5_gn_9_2661.2	741	246	28.4	5.29	12.2	15.5	61.83	9	-0.8
IId	LsWRKY76	Lsat_1_v5_gn_9_9681.1	1035	344	38.5	9.6	13.1	7.9	69.71	4.3	-0.799
IIe	LsWRKY10	Lsat_1_v5_gn_2_131480.1	888	295	32.1	5.33	10.1	13.6	54.24	7.4	-0.724
IIe	LsWRKY16	Lsat_1_v5_gn_3_8741.1	984	327	37.2	5.81	9.8	12.9	57.25	9.8	-0.771
IIe	LsWRKY25	Lsat_1_v5_gn_4_35321.3	1032	343	38.2	7.16	10.5	10.5	51.49	8.7	-0.88
IIe	LsWRKY26	Lsat_1_v5_gn_4_48480.1	870	289	32.7	5.31	10.7	15.6	47.92	7.3	-0.946
IIe	LsWRKY44	Lsat_1_v5_gn_7_25760.1	870	289	32.6	5.19	10.7	15.5	45.54	7.6	-0.984
IIe	LsWRKY45	Lsat_1_v5_gn_7_29520.1	1143	380	41.6	5.52	9.4	12.2	59.32	7.2	-0.781
IIe	LsWRKY47	Lsat_1_v5_gn_7_4000.3	1092	363	40.2	6.21	10.2	11.3	49.48	6.7	-0.963
IIe	LsWRKY60	Lsat_1_v5_gn_8_6481.2	657	218	24.1	5.25	10.1	13.8	48.72	7.9	-0.815
III	LsWRKY07	Lsat_1_v5_gn_2_126380.1	1179	392	44	6.54	10.2	11.5	63.93	7	-0.758
III	LsWRKY08	Lsat_1_v5_gn_2_126880.1	945	314	35	6.26	11.2	12.4	58.69	8.3	-0.746
III	LsWRKY09	Lsat_1_v5_gn_2_126920.1	801	266	30.6	8.96	14.6	11.7	79.77	8.6	-0.46
III	LsWRKY12	Lsat_1_v5_gn_3_139241.1	939	312	35.4	5.37	11.8	15.1	60.61	8.9	-0.66
III	LsWRKY37	Lsat_1_v5_gn_6_12161.1	930	309	34.6	5.47	9.4	12.9	63.17	9.7	-0.674
III	LsWRKY39	Lsat_1_v5_gn_6_84341.2	1026	341	38.1	6.17	8.5	10	61.82	9.4	-0.663
III	LsWRKY51	Lsat_1_v5_gn_7_77361.2	735	244	27.6	8.94	13.1	10.6	53.11	6.9	-1.125
III	LsWRKY58	Lsat_1_v5_gn_8_6060.1	1059	352	39.5	5.54	9	12.5	62.05	8.5	-0.748
III	LsWRKY69	Lsat_1_v5_gn_9_38660.1	891	296	34	6.79	11.5	11.8	72.43	9.2	-0.629
III	LsWRKY70	Lsat_1_v5_gn_9_38680.1	918	305	34.5	6.32	11.4	12.5	72.89	6.9	-0.718
III	LsWRKY71	Lsat_1_v5_gn_9_39381.1	831	276	31.7	9.04	13.4	10.1	64.35	8.3	-0.838
III	LsWRKY72	Lsat_1_v5_gn_9_39460.1	957	318	36.1	5.71	11.3	13.8	63.11	7.8	-0.765
III	LsWRKY75	Lsat_1_v5_gn_9_60201.2	849	282	31.6	6.25	13.2	14.2	59.43	7.7	-0.746

## Sheet: Table S3
Table S3 The paralogs and orthologs gene of WRKY TFs between L. saliva and L.saligna.
#Query_id	Subject_id
LsWRKY01	LsWRKY41
LsWRKY03	LsWRKY21
LsWRKY04	LsWRKY65
LsWRKY05	LsWRKY22
LsWRKY06	LsWRKY74
LsWRKY07	LsWRKY22
LsWRKY08	LsWRKY75
LsWRKY09	LsWRKY75
LsWRKY10	LsWRKY60
LsWRKY11	LsWRKY54
LsWRKY12	LsWRKY39
LsWRKY13	LsWRKY34
LsWRKY14	LsWRKY19
LsWRKY15	LsWRKY33
LsWRKY16	LsWRKY47
LsWRKY17	LsWRKY24
LsWRKY18	LsWRKY57
LsWRKY19	LsWRKY54
LsWRKY20	LsWRKY56
LsWRKY21	LsWRKY03
LsWRKY22	LsWRKY05
LsWRKY23	LsWRKY03
LsWRKY24	LsWRKY57
LsWRKY25	LsWRKY47
LsWRKY26	LsWRKY44
LsWRKY27	LsWRKY43
LsWRKY28	LsWRKY13
LsWRKY29	LsWRKY27
LsWRKY30	LsWRKY63
LsWRKY31	LsWRKY52
LsWRKY32	LsWRKY65
LsWRKY33	LsWRKY15
LsWRKY34	LsWRKY13
LsWRKY35	LsWRKY49
LsWRKY36	LsWRKY38
LsWRKY37	LsWRKY39
LsWRKY38	LsWRKY36
LsWRKY39	LsWRKY37
LsWRKY40	LsWRKY27
LsWRKY41	LsWRKY01
LsWRKY42	LsWRKY74
LsWRKY43	LsWRKY27
LsWRKY44	LsWRKY26
LsWRKY45	LsWRKY25
LsWRKY46	LsWRKY20
LsWRKY47	LsWRKY25
LsWRKY48	LsWRKY59
LsWRKY49	LsWRKY61
LsWRKY50	LsWRKY73
LsWRKY51	LsWRKY39
LsWRKY52	LsWRKY64
LsWRKY53	LsWRKY65
LsWRKY54	LsWRKY19
LsWRKY55	LsWRKY36
LsWRKY56	LsWRKY20
LsWRKY57	LsWRKY18
LsWRKY58	LsWRKY37
LsWRKY59	LsWRKY48
LsWRKY60	LsWRKY10
LsWRKY61	LsWRKY49
LsWRKY62	LsWRKY76
LsWRKY63	LsWRKY30
LsWRKY64	LsWRKY52
LsWRKY65	LsWRKY32
LsWRKY66	LsWRKY45
LsWRKY67	LsWRKY36
LsWRKY68	LsWRKY53
LsWRKY69	LsWRKY72
LsWRKY70	LsWRKY72
LsWRKY71	LsWRKY70
LsWRKY72	LsWRKY70
LsWRKY73	LsWRKY50
LsWRKY74	LsWRKY42
LsWRKY75	LsWRKY08
LsWRKY76	LsWRKY62
LsWRKY01	rna-LSAL_LOCUS41949
LsWRKY03	rna-LSAL_LOCUS7592
LsWRKY04	rna-LSAL_LOCUS9364
LsWRKY05	rna-LSAL_LOCUS9459
LsWRKY06	rna-LSAL_LOCUS13493
LsWRKY07	rna-LSAL_LOCUS13984
LsWRKY08	rna-LSAL_LOCUS13986
LsWRKY09	rna-LSAL_LOCUS41049
LsWRKY10	rna-LSAL_LOCUS14143
LsWRKY11	rna-LSAL_LOCUS14549
LsWRKY12	rna-LSAL_LOCUS1298
LsWRKY13	rna-LSAL_LOCUS15043
LsWRKY14	rna-LSAL_LOCUS15237
LsWRKY15	rna-LSAL_LOCUS5386
LsWRKY16	rna-LSAL_LOCUS31219
LsWRKY17	rna-LSAL_LOCUS16899
LsWRKY18	rna-LSAL_LOCUS6047
LsWRKY19	rna-LSAL_LOCUS18069
LsWRKY20	rna-LSAL_LOCUS18304
LsWRKY21	rna-LSAL_LOCUS21571
LsWRKY22	rna-LSAL_LOCUS21825
LsWRKY23	rna-LSAL_LOCUS22506
LsWRKY24	rna-LSAL_LOCUS22650
LsWRKY25	rna-LSAL_LOCUS18950
LsWRKY26	rna-LSAL_LOCUS19334
LsWRKY27	rna-LSAL_LOCUS19671
LsWRKY28	rna-LSAL_LOCUS15043
LsWRKY29	rna-LSAL_LOCUS26512
LsWRKY30	rna-LSAL_LOCUS26054
LsWRKY31	rna-LSAL_LOCUS26002
LsWRKY32	rna-LSAL_LOCUS27486
LsWRKY33	rna-LSAL_LOCUS23486
LsWRKY34	rna-LSAL_LOCUS24489-2
LsWRKY35	rna-LSAL_LOCUS24956
LsWRKY36	rna-LSAL_LOCUS1452
LsWRKY37	rna-LSAL_LOCUS28264
LsWRKY38	rna-LSAL_LOCUS28014
LsWRKY39	rna-LSAL_LOCUS30275
LsWRKY40	rna-LSAL_LOCUS34221-2
LsWRKY41	rna-LSAL_LOCUS34370
LsWRKY42	rna-LSAL_LOCUS34311
LsWRKY43	rna-LSAL_LOCUS31601
LsWRKY44	rna-LSAL_LOCUS31890-2
LsWRKY45	rna-LSAL_LOCUS32015
LsWRKY46	rna-LSAL_LOCUS32134
LsWRKY47	rna-LSAL_LOCUS31219
LsWRKY48	rna-LSAL_LOCUS32536
LsWRKY49	rna-LSAL_LOCUS32735
LsWRKY50	rna-LSAL_LOCUS42369
LsWRKY51	rna-LSAL_LOCUS33199
LsWRKY52	rna-LSAL_LOCUS33728
LsWRKY53	rna-LSAL_LOCUS37495
LsWRKY54	rna-LSAL_LOCUS38569
LsWRKY55	rna-LSAL_LOCUS38987
LsWRKY56	rna-LSAL_LOCUS761-2
LsWRKY57	rna-LSAL_LOCUS35874
LsWRKY58	rna-LSAL_LOCUS34561
LsWRKY59	rna-LSAL_LOCUS37064
LsWRKY60	rna-LSAL_LOCUS34583-2
LsWRKY61	rna-LSAL_LOCUS32735
LsWRKY62	rna-LSAL_LOCUS36128
LsWRKY63	rna-LSAL_LOCUS42369
LsWRKY64	rna-LSAL_LOCUS42424
LsWRKY65	rna-LSAL_LOCUS27486
LsWRKY66	rna-LSAL_LOCUS39060
LsWRKY67	rna-LSAL_LOCUS40010
LsWRKY68	rna-LSAL_LOCUS40136-2
LsWRKY69	rna-LSAL_LOCUS40196
LsWRKY70	rna-LSAL_LOCUS40195
LsWRKY71	rna-LSAL_LOCUS6369
LsWRKY72	rna-LSAL_LOCUS6368
LsWRKY73	rna-LSAL_LOCUS38987
LsWRKY74	rna-LSAL_LOCUS40655
LsWRKY75	rna-LSAL_LOCUS41049
LsWRKY76	rna-LSAL_LOCUS39278
rna-LSAL_LOCUS1298	rna-LSAL_LOCUS28264
rna-LSAL_LOCUS13493	rna-LSAL_LOCUS40655
rna-LSAL_LOCUS13984	rna-LSAL_LOCUS21825
rna-LSAL_LOCUS13986	rna-LSAL_LOCUS41049
rna-LSAL_LOCUS14143	rna-LSAL_LOCUS34583-2
rna-LSAL_LOCUS1452	rna-LSAL_LOCUS28014
rna-LSAL_LOCUS14549	rna-LSAL_LOCUS15237
rna-LSAL_LOCUS15043	rna-LSAL_LOCUS24489-2
rna-LSAL_LOCUS15237	rna-LSAL_LOCUS18069
rna-LSAL_LOCUS16899	rna-LSAL_LOCUS22650
rna-LSAL_LOCUS17156	rna-LSAL_LOCUS18069
rna-LSAL_LOCUS18069	rna-LSAL_LOCUS15237
rna-LSAL_LOCUS18304	rna-LSAL_LOCUS761-2
rna-LSAL_LOCUS18950	rna-LSAL_LOCUS31219
rna-LSAL_LOCUS19334	rna-LSAL_LOCUS31890-2
rna-LSAL_LOCUS19671	rna-LSAL_LOCUS31601
rna-LSAL_LOCUS21571	rna-LSAL_LOCUS7592
rna-LSAL_LOCUS21825	rna-LSAL_LOCUS9459
rna-LSAL_LOCUS22506	rna-LSAL_LOCUS21571
rna-LSAL_LOCUS22650	rna-LSAL_LOCUS35874
rna-LSAL_LOCUS23486	rna-LSAL_LOCUS5386
rna-LSAL_LOCUS24489-2	rna-LSAL_LOCUS15043
rna-LSAL_LOCUS24956	rna-LSAL_LOCUS32735
rna-LSAL_LOCUS26002	rna-LSAL_LOCUS33728
rna-LSAL_LOCUS26054	rna-LSAL_LOCUS42369
rna-LSAL_LOCUS26512	rna-LSAL_LOCUS34221-2
rna-LSAL_LOCUS27486	rna-LSAL_LOCUS37495
rna-LSAL_LOCUS28014	rna-LSAL_LOCUS1452
rna-LSAL_LOCUS28264	rna-LSAL_LOCUS30275
rna-LSAL_LOCUS30275	rna-LSAL_LOCUS28264
rna-LSAL_LOCUS31219	rna-LSAL_LOCUS18950
rna-LSAL_LOCUS31601	rna-LSAL_LOCUS19671
rna-LSAL_LOCUS31890-2	rna-LSAL_LOCUS19334
rna-LSAL_LOCUS32015	rna-LSAL_LOCUS18950
rna-LSAL_LOCUS32134	rna-LSAL_LOCUS18304
rna-LSAL_LOCUS32536	rna-LSAL_LOCUS37064
rna-LSAL_LOCUS32735	rna-LSAL_LOCUS24956
rna-LSAL_LOCUS33199	rna-LSAL_LOCUS34561
rna-LSAL_LOCUS3360	rna-LSAL_LOCUS41049
rna-LSAL_LOCUS33728	rna-LSAL_LOCUS42424
rna-LSAL_LOCUS34221-2	rna-LSAL_LOCUS19671
rna-LSAL_LOCUS34311	rna-LSAL_LOCUS40655
rna-LSAL_LOCUS34370	rna-LSAL_LOCUS41949
rna-LSAL_LOCUS34561	rna-LSAL_LOCUS1298
rna-LSAL_LOCUS34583-2	rna-LSAL_LOCUS14143
rna-LSAL_LOCUS35874	rna-LSAL_LOCUS6047
rna-LSAL_LOCUS36128	rna-LSAL_LOCUS39278
rna-LSAL_LOCUS37064	rna-LSAL_LOCUS32536
rna-LSAL_LOCUS37495	rna-LSAL_LOCUS40136-2
rna-LSAL_LOCUS38569	rna-LSAL_LOCUS18069
rna-LSAL_LOCUS38987	rna-LSAL_LOCUS1452
rna-LSAL_LOCUS39060	rna-LSAL_LOCUS32015
rna-LSAL_LOCUS39278	rna-LSAL_LOCUS36128
rna-LSAL_LOCUS40010	rna-LSAL_LOCUS18304
rna-LSAL_LOCUS40136-2	rna-LSAL_LOCUS37495
rna-LSAL_LOCUS40195	rna-LSAL_LOCUS6368
rna-LSAL_LOCUS40196	rna-LSAL_LOCUS6368
rna-LSAL_LOCUS40655	rna-LSAL_LOCUS34311
rna-LSAL_LOCUS41049	rna-LSAL_LOCUS3360
rna-LSAL_LOCUS41949	rna-LSAL_LOCUS34370
rna-LSAL_LOCUS42369	rna-LSAL_LOCUS26054
rna-LSAL_LOCUS42424	rna-LSAL_LOCUS33728
rna-LSAL_LOCUS5386	rna-LSAL_LOCUS23486
rna-LSAL_LOCUS6047	rna-LSAL_LOCUS35874
rna-LSAL_LOCUS6368	rna-LSAL_LOCUS40195
rna-LSAL_LOCUS6369	rna-LSAL_LOCUS40195
rna-LSAL_LOCUS7592	rna-LSAL_LOCUS21571
rna-LSAL_LOCUS761-2	rna-LSAL_LOCUS18304
rna-LSAL_LOCUS9364	rna-LSAL_LOCUS27486
rna-LSAL_LOCUS9459	rna-LSAL_LOCUS21825

## Sheet: Table S4
Table S4 The statistical power of the identified DEGs in RNA-Seq. S1: diameter length is 1 cm, S2: diameter length is 2 cm, S3: diameter length is 3 cm, S4: diameter length is 4 cm.1, 2, 3 represents three biological replicates of each developmental stage.
#ID	S1-7_S1-8_S1-9_vs_S2-7_S2-8_S2-9	S1-7_S1-8_S1-9_vs_S3-7_S3-9_S3-10	S1-7_S1-8_S1-9_vs_S4-7_S4-8_S4-9	S2-7_S2-8_S2-9_vs_S3-7_S3-9_S3-10	S2-7_S2-8_S2-9_vs_S4-7_S4-8_S4-9	S3-7_S3-9_S3-10_vs_S4-7_S4-8_S4-9
Lsat_1_v5_gn_1_50480	0.906246	0.345777	0.284419	0.403483	0.471752	0.0534607
Lsat_1_v5_gn_8_27820	0.905764	0.412899	0.337214	0.335845	0.411436	0.0546106
Lsat_1_v5_gn_1_56881	0.9054	0.388426	0.316328	0.358404	0.433297	0.0543682
Lsat_1_v5_gn_7_106380	0.905209	0.394471	0.396589	0.352126	0.350089	0.0500035
Lsat_1_v5_gn_5_127901	0.905039	0.254978	0.315476	0.504626	0.433401	0.0536965
Lsat_1_v5_gn_4_102640	0.904377	0.544514	0.453834	0.222996	0.296026	0.055971
Lsat_1_v5_gn_2_120401	0.904143	0.319714	0.361571	0.426647	0.382355	0.051504
Lsat_1_v5_gn_5_47580	0.901291	0.300678	0.280593	0.441415	0.46473	0.0503975
Lsat_1_v5_gn_1_90341	0.900568	0.477529	0.298285	0.268547	0.442505	0.0760949
Lsat_1_v5_gn_8_160141	0.900137	0.381024	0.205481	0.354232	0.558869	0.0818159
Lsat_1_v5_gn_4_7600	0.899648	0.279021	0.267659	0.462864	0.476521	0.0501352
Lsat_1_v5_gn_9_57440	0.899158	0.372725	0.447407	0.36031	0.291267	0.054263
Lsat_1_v5_gn_5_172740	0.898621	0.437105	0.541925	0.2992	0.215222	0.0580059
Lsat_1_v5_gn_2_115441	0.89816	0.523292	0.499585	0.228239	0.246443	0.0504054
Lsat_1_v5_gn_4_1361	0.898107	0.246229	0.445293	0.499737	0.291068	0.0853907
Lsat_1_v5_gn_4_112420	0.897321	0.475561	0.413874	0.264168	0.317442	0.0528077
Lsat_1_v5_gn_9_84880	0.896233	0.351098	0.516033	0.375898	0.230478	0.0707389
Lsat_1_v5_gn_8_82540	0.895888	0.322446	0.225095	0.405331	0.522448	0.0601019
Lsat_1_v5_gn_2_106361	0.895815	0.378322	0.420398	0.347883	0.308579	0.0513662
Lsat_1_v5_gn_9_28881	0.895219	0.372226	0.437654	0.352618	0.292198	0.0532884
Lsat_1_v5_gn_1_741	0.89516	0.205094	0.359672	0.548394	0.364965	0.0753608
Lsat_1_v5_gn_1_41600	0.895159	0.429579	0.267555	0.29915	0.466662	0.0728758
Lsat_1_v5_gn_6_7240	0.894995	0.474638	0.465975	0.260745	0.267825	0.0500544
Lsat_1_v5_gn_2_130241	0.894988	0.414189	0.370891	0.312578	0.353458	0.0514608
Lsat_1_v5_gn_0_29881	0.894538	0.345827	0.279401	0.377771	0.451111	0.0540892
Lsat_1_v5_gn_6_7160	0.894086	0.396121	0.340859	0.32745	0.381977	0.052479
Lsat_1_v5_gn_7_105741	0.893997	0.275746	0.491171	0.454279	0.245828	0.0886006
Lsat_1_v5_gn_8_145181	0.893901	0.405509	0.604254	0.318388	0.16597	0.0795419
Lsat_1_v5_gn_8_156720	0.893838	0.277015	0.423737	0.452425	0.301808	0.068565
Lsat_1_v5_gn_5_142340	0.893816	0.394526	0.360215	0.328413	0.36166	0.0509387
Lsat_1_v5_gn_5_167281	0.89377	0.224214	0.232062	0.518998	0.50854	0.0500789
Lsat_1_v5_gn_3_14441	0.893164	0.358823	0.577763	0.361728	0.182055	0.0863953
Lsat_1_v5_gn_8_61201	0.893118	0.301481	0.271198	0.422573	0.457829	0.0509178
Lsat_1_v5_gn_8_148061	0.893086	0.347811	0.487396	0.372733	0.24724	0.0649813
Lsat_1_v5_gn_5_91960	0.892944	0.22329	0.256394	0.518454	0.475571	0.0513273
Lsat_1_v5_gn_4_38780	0.892905	0.401608	0.560909	0.320051	0.193012	0.0687774
Lsat_1_v5_gn_4_15421	0.892859	0.307123	0.560698	0.415707	0.193088	0.100826
Lsat_1_v5_gn_9_28941	0.892638	0.326744	0.461458	0.393848	0.26734	0.0643701
Lsat_1_v5_gn_6_115320	0.892455	0.339259	0.563432	0.380271	0.190642	0.0886175
Lsat_1_v5_gn_8_110401	0.892432	0.412554	0.373352	0.309153	0.345903	0.0511963
Lsat_1_v5_gn_5_121081	0.89241	0.245779	0.500854	0.487798	0.235672	0.106379
Lsat_1_v5_gn_5_39581	0.892341	0.411239	0.35678	0.310168	0.362113	0.0523442
Lsat_1_v5_gn_5_51921	0.89231	0.395404	0.223321	0.324654	0.517045	0.0788744
Lsat_1_v5_gn_3_97401	0.892108	0.229108	0.27444	0.50886	0.451778	0.052361
Lsat_1_v5_gn_3_74761	0.891922	0.317296	0.415594	0.402547	0.305455	0.0579385
Lsat_1_v5_gn_4_156941	0.891774	0.378903	0.524147	0.339232	0.217252	0.0657603
Lsat_1_v5_gn_4_164101	0.891529	0.223615	0.252956	0.514972	0.476826	0.0510499
Lactuca_sativa_newGene_7430	0.891523	0.238729	0.163272	0.494965	0.603606	0.0587326
Lsat_1_v5_gn_5_177780	0.891422	0.367577	0.301886	0.349543	0.41854	0.0537704
Lsat_1_v5_gn_4_63300	0.891377	0.330364	0.545606	0.387393	0.201329	0.0858492
Lsat_1_v5_gn_4_171740	0.89127	0.342341	0.47897	0.374654	0.250811	0.0644599
Lsat_1_v5_gn_3_49560	0.890953	0.335945	0.2179	0.380658	0.521508	0.0648071
Lsat_1_v5_gn_8_108741	0.890069	0.353597	0.432467	0.360762	0.287197	0.0548675
Lsat_1_v5_gn_6_52680	0.889863	0.6234	0.497407	0.149235	0.234151	0.0618862
Lsat_1_v5_gn_6_78761	0.889769	0.53053	0.601263	0.209568	0.162485	0.0537221
Lsat_1_v5_gn_4_84661	0.889643	0.475487	0.3236	0.250834	0.391052	0.0682223
Lsat_1_v5_gn_9_123441	0.889175	0.305458	0.135933	0.409887	0.64521	0.092229
Lsat_1_v5_gn_1_80781	0.88905	0.340782	0.271343	0.371798	0.449029	0.054559
Lsat_1_v5_gn_9_77400	0.888785	0.382219	0.480986	0.330281	0.245074	0.0573194
Lsat_1_v5_gn_9_54101	0.888701	0.210419	0.286568	0.527093	0.43035	0.0568248
Lsat_1_v5_gn_4_97521	0.88844	0.481005	0.426859	0.244493	0.289124	0.0521481
Lsat_1_v5_gn_4_4041	0.888224	0.435106	0.548341	0.281639	0.194854	0.0593566
Lsat_1_v5_gn_5_191321	0.888097	0.203863	0.445986	0.535078	0.272225	0.106984
Lsat_1_v5_gn_4_74321	0.888095	0.474737	0.447148	0.248853	0.271252	0.0505543
Lactuca_sativa_newGene_5904	0.887896	0.351667	0.313316	0.358422	0.398625	0.0512869
Lsat_1_v5_gn_3_62921	0.887886	0.412163	0.477897	0.301057	0.246019	0.053189
Lsat_1_v5_gn_1_52061	0.887324	0.44545	0.241355	0.271337	0.482702	0.0875244
Lsat_1_v5_gn_4_86400	0.887065	0.237556	0.380597	0.487083	0.328564	0.0696699
Lsat_1_v5_gn_6_67781	0.887038	0.33001	0.233906	0.379019	0.491797	0.0595399
Lsat_1_v5_gn_0_10840	0.88669	0.294366	0.406908	0.41728	0.303589	0.0607893
Lactuca_sativa_newGene_917	0.886676	0.347626	0.176913	0.360124	0.572113	0.0840609
Lsat_1_v5_gn_5_165000	0.886579	0.237171	0.446793	0.486574	0.268943	0.0898517
Lsat_1_v5_gn_3_76981	0.886377	0.208061	0.469304	0.525559	0.250328	0.114588
Lsat_1_v5_gn_9_59420	0.886106	0.188956	0.488405	0.552666	0.235019	0.137452
Lsat_1_v5_gn_9_54780	0.885862	0.421082	0.195768	0.289567	0.542119	0.101438
Lsat_1_v5_gn_4_162940	0.885753	0.441538	0.567228	0.271911	0.178859	0.0615557
Lsat_1_v5_gn_5_103460	0.885656	0.363439	0.350098	0.342423	0.355657	0.0501472
Lactuca_sativa_newGene_4707	0.885525	0.453417	0.561995	0.261708	0.181974	0.0585926
Lsat_1_v5_gn_7_109080	0.885305	0.2946	0.224102	0.414218	0.501252	0.0555631
Lsat_1_v5_gn_4_124900	0.884802	0.538304	0.480933	0.196897	0.238693	0.0523799
Lsat_1_v5_gn_4_5181	0.884563	0.218528	0.122985	0.507296	0.66033	0.0680725
Lsat_1_v5_gn_3_76921	0.884293	0.118234	0.21946	0.669062	0.50547	0.0708073
Lsat_1_v5_gn_5_69280	0.884054	0.134484	0.210619	0.637875	0.517197	0.0610606
Lsat_1_v5_gn_9_111920	0.884053	0.263033	0.275709	0.448801	0.433576	0.0501709
Lsat_1_v5_gn_7_110980	0.883705	0.337759	0.18004	0.364461	0.561267	0.0792338
Lsat_1_v5_gn_5_160961	0.883521	0.246794	0.347887	0.467926	0.353806	0.0600247
Lsat_1_v5_gn_4_107200	0.883483	0.284017	0.513761	0.422703	0.212248	0.0930988
Lsat_1_v5_gn_1_72861	0.88333	0.314106	0.178197	0.388693	0.563352	0.0727175
Lsat_1_v5_gn_3_73741	0.883134	0.44975	0.39803	0.260738	0.305214	0.0520072
Lsat_1_v5_gn_2_65981	0.882727	0.494391	0.401981	0.225289	0.300932	0.0563152
Lsat_1_v5_gn_2_127221	0.882702	0.420304	0.448731	0.284746	0.26086	0.0505993
Lsat_1_v5_gn_4_35620	0.882317	0.266009	0.389429	0.441695	0.311611	0.0637655
Lsat_1_v5_gn_1_24741	0.882086	0.352223	0.573477	0.346773	0.170149	0.0873049
Lsat_1_v5_gn_9_54500	0.882082	0.478965	0.242886	0.235957	0.470004	0.0990416
Lsat_1_v5_gn_4_157500	0.882066	0.223139	0.531176	0.495952	0.197984	0.134427
Lsat_1_v5_gn_2_91520	0.881963	0.215159	0.402181	0.506643	0.299411	0.0844872
Lsat_1_v5_gn_2_16021	0.881641	0.416894	0.648241	0.285884	0.126444	0.0908294
Lsat_1_v5_gn_7_43720	0.881583	0.439718	0.638346	0.266434	0.131663	0.0797995
Lsat_1_v5_gn_0_29861	0.881491	0.598192	0.360946	0.15432	0.337085	0.092881
Lsat_1_v5_gn_8_72501	0.881474	0.552774	0.269583	0.182669	0.435713	0.11617
Lactuca_sativa_newGene_6999	0.881158	0.424102	0.233878	0.278859	0.479827	0.0836097
Lsat_1_v5_gn_6_109301	0.881135	0.290057	0.429338	0.411118	0.274374	0.0663511
Lsat_1_v5_gn_4_13301	0.881088	0.23852	0.537706	0.473634	0.19219	0.127453
Lsat_1_v5_gn_9_6940	0.880956	0.62944	0.406039	0.135868	0.294226	0.0877553
Lsat_1_v5_gn_6_38201	0.880945	0.151038	0.13411	0.602695	0.63263	0.0507063
Lactuca_sativa_newGene_7262	0.880888	0.530472	0.603343	0.196845	0.150595	0.0539553
Lsat_1_v5_gn_5_101400	0.880855	0.294852	0.314613	0.405137	0.383362	0.050368
Lsat_1_v5_gn_8_14040	0.88083	0.361241	0.292744	0.335587	0.40747	0.0541822
Lsat_1_v5_gn_1_60360	0.880706	0.398124	0.62013	0.30086	0.140776	0.0872077
Lsat_1_v5_gn_2_63620	0.880581	0.421886	0.604973	0.279785	0.149298	0.0749559
Lactuca_sativa_newGene_281	0.88042	0.611288	0.445382	0.145477	0.259883	0.0704591
Lsat_1_v5_gn_9_16960	0.880376	0.170734	0.470099	0.569167	0.240155	0.142793
Lsat_1_v5_gn_5_7081	0.880311	0.166248	0.178192	0.57622	0.557344	0.050264
Lsat_1_v5_gn_6_22621	0.880197	0.223134	0.437387	0.492207	0.266093	0.0930945
Lsat_1_v5_gn_5_148120	0.880192	0.486697	0.693112	0.227229	0.103006	0.0837838
Lsat_1_v5_gn_5_85741	0.880163	0.263603	0.319151	0.440333	0.37718	0.053048
Lsat_1_v5_gn_9_19140	0.880091	0.461465	0.487733	0.246461	0.226303	0.0504996
Lsat_1_v5_gn_1_9801	0.879698	0.463899	0.642162	0.243937	0.127736	0.0740347
Lsat_1_v5_gn_5_99740	0.879616	0.22671	0.504761	0.486243	0.213126	0.1191
Lsat_1_v5_gn_5_129800	0.879582	0.118086	0.3907	0.660673	0.305623	0.151959
Lactuca_sativa_newGene_6891	0.879452	0.275876	0.52123	0.424262	0.20125	0.0995721
Lsat_1_v5_gn_8_52720	0.879437	0.671729	0.351546	0.112488	0.342558	0.131147
Lsat_1_v5_gn_3_8340	0.87941	0.521172	0.542638	0.201233	0.186655	0.0503341
Lactuca_sativa_newGene_364	0.879335	0.503424	0.622057	0.213686	0.138246	0.0605388
Lsat_1_v5_gn_8_103481	0.879307	0.285021	0.227919	0.413332	0.484017	0.0536806
Lsat_1_v5_gn_7_53461	0.879205	0.631697	0.565641	0.132835	0.171507	0.05336
Lsat_1_v5_gn_2_93321	0.879163	0.581073	0.625432	0.16189	0.136206	0.0515204
Lsat_1_v5_gn_8_73841	0.879145	0.628746	0.416125	0.134375	0.28233	0.0840949
Lsat_1_v5_gn_9_54680	0.879112	0.164685	0.123435	0.576409	0.649312	0.0541796
Lsat_1_v5_gn_3_80180	0.878949	0.527949	0.652704	0.195934	0.121538	0.0620036
Lsat_1_v5_gn_2_84800	0.878799	0.210335	0.572036	0.507034	0.167011	0.16762
Lsat_1_v5_gn_1_221	0.878643	0.483135	0.589649	0.227595	0.156117	0.0583311
Lsat_1_v5_gn_8_20321	0.878603	0.195743	0.132995	0.527545	0.630273	0.0579933
Lsat_1_v5_gn_5_169880	0.878596	0.345405	0.230742	0.347137	0.478861	0.0633833
Lsat_1_v5_gn_0_37500	0.878058	0.3225	0.523435	0.369676	0.197822	0.0815293
Lsat_1_v5_gn_2_91361	0.877951	0.628664	0.399589	0.133207	0.294815	0.0897603
Lsat_1_v5_gn_3_14061	0.877686	0.586255	0.45532	0.157042	0.247576	0.0625882
Lsat_1_v5_gn_2_109040	0.877577	0.457773	0.256599	0.24547	0.443842	0.0852278
Lsat_1_v5_gn_2_65481	0.877564	0.583598	0.399659	0.158493	0.294096	0.0751836
Lsat_1_v5_gn_0_9321	0.87756	0.167287	0.332194	0.569185	0.358659	0.0836103
Lsat_1_v5_gn_4_109061	0.877383	0.570875	0.539036	0.166029	0.186402	0.0507448
Lsat_1_v5_gn_1_58781	0.877261	0.387334	0.485876	0.304679	0.223522	0.0572538
Lsat_1_v5_gn_1_8460	0.877203	0.316778	0.309587	0.374148	0.381877	0.0500475
Lsat_1_v5_gn_9_53960	0.877193	0.201349	0.538228	0.516633	0.186692	0.154909
Lsat_1_v5_gn_5_5940	0.877129	0.357441	0.27707	0.332609	0.418368	0.0559268
Lsat_1_v5_gn_9_28921	0.877033	0.28027	0.477636	0.41445	0.229348	0.0823848
Lsat_1_v5_gn_5_90720	0.876929	0.431902	0.646672	0.265358	0.122733	0.0850632
Lsat_1_v5_gn_5_171660	0.876848	0.559013	0.225113	0.172795	0.482926	0.148041
Lsat_1_v5_gn_7_45300	0.876749	0.348032	0.481706	0.341173	0.225879	0.0637594
Lsat_1_v5_gn_2_106620	0.876499	0.362143	0.535864	0.326944	0.187362	0.0727861
Lsat_1_v5_gn_3_131260	0.876493	0.336681	0.121267	0.352116	0.648752	0.118726
Lsat_1_v5_gn_5_154440	0.876357	0.275329	0.489977	0.418934	0.219197	0.0883632
Lsat_1_v5_gn_7_88540	0.876261	0.407533	0.314988	0.284986	0.374309	0.0570977
Lsat_1_v5_gn_5_172380	0.876235	0.398248	0.555321	0.293113	0.174383	0.0682676
Lsat_1_v5_gn_7_47981	0.876206	0.488453	0.269782	0.220098	0.425208	0.0901525
Lsat_1_v5_gn_4_63420	0.876103	0.30677	0.590378	0.382882	0.152812	0.11371
Lsat_1_v5_gn_6_83821	0.876063	0.273001	0.308054	0.421115	0.381412	0.0512131
Lsat_1_v5_gn_4_181920	0.876037	0.470621	0.46667	0.233193	0.236217	0.0500113
Lsat_1_v5_gn_6_101520	0.875966	0.705979	0.467457	0.0940946	0.235507	0.0955871
Lactuca_sativa_newGene_7259	0.875944	0.495935	0.650973	0.214279	0.119642	0.0683576
Lsat_1_v5_gn_9_16980	0.875907	0.184748	0.345365	0.538668	0.342316	0.0795428
Lsat_1_v5_gn_8_124621	0.875738	0.65324	0.514264	0.118319	0.201022	0.0648404
Lsat_1_v5_gn_1_75300	0.875613	0.471813	0.407825	0.231661	0.283665	0.0530331
Lsat_1_v5_gn_8_133621	0.875524	0.332777	0.113748	0.354347	0.662134	0.124451
Lsat_1_v5_gn_7_109420	0.875498	0.151181	0.139541	0.592023	0.612509	0.0503233
Lsat_1_v5_gn_4_133320	0.875459	0.416797	0.18731	0.275691	0.533925	0.104767
Lsat_1_v5_gn_2_108321	0.875398	0.311314	0.508684	0.376656	0.204453	0.0808551
Lsat_1_v5_gn_4_147121	0.875393	0.457998	0.599809	0.24197	0.146577	0.0648463
Lsat_1_v5_gn_4_13981	0.875284	0.65557	0.4851	0.116756	0.221247	0.0722387
Lsat_1_v5_gn_3_71041	0.874946	0.438806	0.260676	0.256567	0.433773	0.077776
Lsat_1_v5_gn_8_83661	0.874929	0.621399	0.643037	0.1341	0.122733	0.050378
Lactuca_sativa_newGene_6057	0.87487	0.436029	0.448358	0.25871	0.248773	0.050112
Lsat_1_v5_gn_4_86521	0.874854	0.274124	0.430105	0.417493	0.263553	0.0709775
Lactuca_sativa_newGene_212	0.874712	0.145933	0.469383	0.599659	0.232184	0.16676
Lsat_1_v5_gn_9_55320	0.87466	0.306309	0.134758	0.380709	0.619685	0.0934003
Lsat_1_v5_gn_6_88680	0.87463	0.272637	0.524205	0.418822	0.192746	0.102298
Lsat_1_v5_gn_6_61660	0.874607	0.332357	0.567064	0.353125	0.165095	0.0925765
Lsat_1_v5_gn_5_51740	0.874583	0.378138	0.325017	0.308549	0.360659	0.0523679
Lsat_1_v5_gn_1_120560	0.874428	0.601347	0.479371	0.144674	0.224263	0.0609844
Lsat_1_v5_gn_0_45961	0.874388	0.416147	0.651052	0.274518	0.118201	0.0921787
Lsat_1_v5_gn_1_125981	0.874161	0.314978	0.612989	0.370463	0.137907	0.120141
Lsat_1_v5_gn_5_148001	0.874148	0.144231	0.200504	0.601609	0.511935	0.0559578
Lsat_1_v5_gn_8_113201	0.874146	0.535654	0.606718	0.184496	0.141362	0.0537748
Lsat_1_v5_gn_7_100380	0.87408	0.477002	0.49565	0.225528	0.211886	0.0502509
Lsat_1_v5_gn_2_130100	0.874043	0.420372	0.177536	0.270392	0.546172	0.112748
Lsat_1_v5_gn_2_660	0.873993	0.302087	0.471145	0.384096	0.2298	0.0731697
Lsat_1_v5_gn_6_81041	0.873663	0.211208	0.360071	0.495794	0.323987	0.073152
Lsat_1_v5_gn_9_55680	0.873658	0.161652	0.460362	0.570909	0.237546	0.14561
Lsat_1_v5_gn_7_11601	0.87347	0.152584	0.27055	0.585796	0.419105	0.0705543
Lsat_1_v5_gn_1_39760	0.873369	0.447723	0.588062	0.247	0.151154	0.0644863
Lsat_1_v5_gn_9_80640	0.873337	0.28286	0.674236	0.40448	0.106187	0.176882
Lactuca_sativa_newGene_3979	0.873246	0.31611	0.377351	0.367599	0.307015	0.0531843
Lsat_1_v5_gn_5_59000	0.873134	0.660109	0.330949	0.11268	0.351932	0.136135
Lsat_1_v5_gn_5_132840	0.873105	0.242125	0.523795	0.453413	0.191049	0.118552
Lsat_1_v5_gn_1_47261	0.873057	0.376228	0.427298	0.307733	0.263059	0.052008
Lsat_1_v5_gn_2_116501	0.872838	0.592858	0.281525	0.147816	0.405088	0.128757
Lsat_1_v5_gn_1_36301	0.872791	0.479723	0.42694	0.221673	0.262941	0.0520417
Lsat_1_v5_gn_3_100161	0.872519	0.564951	0.564083	0.163965	0.164496	0.0500006
Lsat_1_v5_gn_7_87360	0.872177	0.439469	0.33593	0.251785	0.34517	0.0585001
Lsat_1_v5_gn_7_11360	0.872159	0.58218	0.65823	0.153264	0.112759	0.0546035
Lsat_1_v5_gn_3_28860	0.872108	0.662495	0.460478	0.110681	0.235182	0.0813438
Lsat_1_v5_gn_6_9780	0.87197	0.42876	0.38996	0.26017	0.293439	0.0511466
Lsat_1_v5_gn_3_11741	0.871892	0.310837	0.317713	0.370777	0.363468	0.0500433
Lsat_1_v5_gn_9_124960	0.871867	0.44952	0.308019	0.243336	0.37376	0.066287
Lsat_1_v5_gn_6_52280	0.871588	0.303777	0.27329	0.377856	0.412356	0.0509233
Lsat_1_v5_gn_8_121441	0.871542	0.329564	0.190688	0.35053	0.521355	0.0722425
Lsat_1_v5_gn_7_55280	0.871519	0.240991	0.529531	0.451861	0.185227	0.121933
Lsat_1_v5_gn_8_54460	0.871456	0.177466	0.347447	0.541359	0.332435	0.0837206
Lsat_1_v5_gn_9_35080	0.871334	0.204675	0.467448	0.500566	0.228765	0.115914
Lsat_1_v5_gn_2_86780	0.871268	0.528722	0.399041	0.185446	0.284268	0.0624232
Lsat_1_v5_gn_8_49981	0.871266	0.502666	0.456384	0.203115	0.237107	0.0515507
Lsat_1_v5_gn_6_87800	0.871233	0.612136	0.639715	0.135442	0.121054	0.0506076
Lactuca_sativa_newGene_5320	0.871198	0.496574	0.273929	0.207304	0.410883	0.0912483
Lsat_1_v5_gn_2_106321	0.871003	0.683154	0.602126	0.100355	0.140689	0.0554469
Lsat_1_v5_gn_8_75041	0.870987	0.311875	0.349009	0.368041	0.330096	0.0512125
Lsat_1_v5_gn_2_71681	0.870973	0.309471	0.439815	0.37059	0.249695	0.0638712
Lsat_1_v5_gn_8_148500	0.870855	0.240607	0.599613	0.451101	0.141933	0.160123
Lactuca_sativa_newGene_3663	0.870683	0.324964	0.326496	0.353751	0.352169	0.0500021
Lsat_1_v5_gn_7_58281	0.870679	0.429338	0.485726	0.257721	0.214357	0.0523253
Lsat_1_v5_gn_5_172641	0.87067	0.633373	0.317107	0.123756	0.36193	0.129347
Lsat_1_v5_gn_5_82521	0.870643	0.661294	0.332859	0.110043	0.345594	0.135711
Lsat_1_v5_gn_3_104341	0.870465	0.315552	0.584273	0.363207	0.15022	0.106705
Lsat_1_v5_gn_9_99560	0.870447	0.473267	0.512801	0.223158	0.195063	0.0511281
Lsat_1_v5_gn_9_69180	0.870386	0.246909	0.564924	0.442214	0.161553	0.1359
Lsat_1_v5_gn_9_39001	0.870327	0.289174	0.210837	0.391753	0.489957	0.0571786
Lsat_1_v5_gn_4_35660	0.870325	0.533856	0.412632	0.180928	0.271075	0.0607905
Lsat_1_v5_gn_4_119280	0.870189	0.433547	0.45294	0.253559	0.238207	0.0502768
Lsat_1_v5_gn_4_87600	0.870073	0.470092	0.565856	0.224997	0.16064	0.056678
Lsat_1_v5_gn_4_74340	0.869987	0.244668	0.568854	0.444301	0.158749	0.139504
Lsat_1_v5_gn_6_94980	0.869809	0.130068	0.401535	0.619636	0.279772	0.144347
Lsat_1_v5_gn_6_100360	0.869771	0.134895	0.148947	0.610494	0.585208	0.0504898
Lsat_1_v5_gn_9_42181	0.869744	0.396367	0.187093	0.284172	0.523353	0.0965907
Lsat_1_v5_gn_2_2740	0.86962	0.408838	0.16319	0.273199	0.560794	0.117875
Lsat_1_v5_gn_5_188341	0.869605	0.451779	0.552625	0.238259	0.168181	0.0573987
Lsat_1_v5_gn_7_34521	0.869565	0.158918	0.153791	0.567787	0.576463	0.050056
Lsat_1_v5_gn_8_100801	0.869547	0.5226	0.281119	0.187348	0.399506	0.0976809
Lsat_1_v5_gn_2_116640	0.869186	0.103687	0.197416	0.672595	0.506981	0.0714053
Lsat_1_v5_gn_5_113581	0.869175	0.202008	0.135853	0.50031	0.607638	0.0585471
Lsat_1_v5_gn_4_112840	0.869077	0.616111	0.434344	0.131232	0.251252	0.074659
Lsat_1_v5_gn_5_141241	0.869067	0.356707	0.394618	0.319392	0.284631	0.0511497
Lsat_1_v5_gn_5_24841	0.869033	0.242189	0.624672	0.445675	0.12672	0.174829
Lsat_1_v5_gn_1_28600	0.868961	0.539067	0.519316	0.175937	0.188798	0.0502826
Lsat_1_v5_gn_4_42220	0.86884	0.321719	0.192547	0.353886	0.513496	0.0693854
Lsat_1_v5_gn_4_160020	0.868771	0.49137	0.548668	0.20775	0.169673	0.0523783
Lsat_1_v5_gn_6_98760	0.868667	0.385829	0.637642	0.291784	0.119819	0.0985027
Lactuca_sativa_newGene_2432	0.868467	0.310623	0.213762	0.364909	0.482392	0.0604807
Lsat_1_v5_gn_5_107161	0.868426	0.728888	0.423568	0.0802348	0.25904	0.126403
Lsat_1_v5_gn_9_95821	0.868411	0.156536	0.160651	0.569665	0.562758	0.0500353
Lsat_1_v5_gn_8_137081	0.868388	0.437556	0.683441	0.247664	0.0983118	0.0972777
Lsat_1_v5_gn_9_40860	0.86837	0.639838	0.65718	0.118473	0.11013	0.0502505
Lsat_1_v5_gn_0_1260	0.868293	0.169602	0.304727	0.547895	0.370933	0.0735135
Lsat_1_v5_gn_6_46020	0.868222	0.229403	0.585069	0.460768	0.147405	0.159967
Lsat_1_v5_gn_1_59680	0.868158	0.583187	0.236287	0.148411	0.451639	0.153563
Lsat_1_v5_gn_5_138920	0.868088	0.508609	0.149011	0.194903	0.582009	0.18824
Lsat_1_v5_gn_9_122941	0.867936	0.419234	0.309207	0.261876	0.365488	0.0600191
Lsat_1_v5_gn_8_2220	0.867931	0.401978	0.416913	0.276444	0.263796	0.0501696
Lsat_1_v5_gn_8_159641	0.867912	0.385398	0.143247	0.290961	0.591884	0.122846
Lsat_1_v5_gn_8_135220	0.86784	0.474533	0.697943	0.218628	0.0918347	0.0896887
Lsat_1_v5_gn_4_55600	0.867742	0.423849	0.300653	0.257781	0.374387	0.0626585
Lactuca_sativa_newGene_4187	0.867703	0.534019	0.294735	0.177666	0.380824	0.0959565
Lsat_1_v5_gn_2_119141	0.867698	0.216889	0.214186	0.476649	0.480373	0.05001
Lsat_1_v5_gn_2_70260	0.867672	0.441917	0.679184	0.243165	0.0996397	0.09385
Lsat_1_v5_gn_4_142660	0.867586	0.540029	0.606309	0.173708	0.135027	0.0532875
Lsat_1_v5_gn_9_103620	0.86758	0.506065	0.479288	0.195991	0.214812	0.0505171
Lsat_1_v5_gn_2_72221	0.867476	0.410679	0.478561	0.268328	0.215199	0.0534029
Lsat_1_v5_gn_5_53001	0.867465	0.329126	0.58024	0.343895	0.149373	0.0989307
Lsat_1_v5_gn_4_121381	0.867358	0.46837	0.176709	0.22251	0.534877	0.136799
Lsat_1_v5_gn_5_79481	0.867268	0.298083	0.418373	0.376361	0.26158	0.0621567
Lactuca_sativa_newGene_1833	0.867262	0.693375	0.482443	0.0933246	0.21211	0.085258
Lsat_1_v5_gn_2_21401	0.867151	0.468215	0.369087	0.22234	0.304575	0.0574705
Lsat_1_v5_gn_5_3921	0.867099	0.172619	0.53682	0.540857	0.175168	0.180674
Lsat_1_v5_gn_5_62121	0.866953	0.127593	0.121908	0.619285	0.630446	0.0500993
Lsat_1_v5_gn_5_172240	0.866951	0.503523	0.393777	0.196928	0.282034	0.0589354
Lsat_1_v5_gn_2_48640	0.866871	0.5996	0.586497	0.137959	0.145209	0.0501307
Lsat_1_v5_gn_6_28341	0.866848	0.597238	0.573683	0.139226	0.152507	0.0504188
Lsat_1_v5_gn_8_22281	0.866804	0.635253	0.436312	0.119384	0.246337	0.0798481
Lsat_1_v5_gn_9_70441	0.866795	0.442563	0.505995	0.241391	0.195046	0.0529229
Lsat_1_v5_gn_5_179460	0.86679	0.49275	0.649041	0.204179	0.112687	0.0686165
Lsat_1_v5_gn_4_152820	0.866766	0.372654	0.525285	0.300664	0.182181	0.0674719
Lsat_1_v5_gn_3_54540	0.86674	0.127292	0.221762	0.619489	0.468236	0.0670541
Lactuca_sativa_newGene_2796	0.866716	0.583036	0.335289	0.147004	0.336399	0.097417
Lsat_1_v5_gn_7_103501	0.866214	0.347513	0.640437	0.3235	0.116342	0.116914
Lsat_1_v5_gn_8_26061	0.866155	0.124231	0.145469	0.624441	0.584739	0.0512196
Lsat_1_v5_gn_0_37700	0.866059	0.394792	0.396889	0.27976	0.277938	0.0500034
Lsat_1_v5_gn_4_34561	0.866021	0.589601	0.684244	0.142616	0.0962922	0.0573708
Lsat_1_v5_gn_3_52761	0.865985	0.455414	0.659566	0.230332	0.107135	0.0819321
Lactuca_sativa_newGene_4148	0.865963	0.706778	0.419735	0.0871008	0.258505	0.115934
Lsat_1_v5_gn_6_17241	0.865916	0.563621	0.533289	0.157407	0.176025	0.0506731
Lsat_1_v5_gn_5_119220	0.86586	0.560319	0.434917	0.15931	0.246078	0.0615018
Lsat_1_v5_gn_1_24401	0.865764	0.128556	0.271963	0.615321	0.403312	0.0837984
Lsat_1_v5_gn_8_25181	0.865662	0.4463	0.654608	0.236865	0.109166	0.0831266
Lsat_1_v5_gn_3_117600	0.865657	0.714504	0.575802	0.0839569	0.150035	0.0663008
Lsat_1_v5_gn_3_19540	0.865646	0.581079	0.458343	0.147016	0.227647	0.0610362
Lsat_1_v5_gn_5_48361	0.865608	0.540953	0.462948	0.170842	0.224142	0.0544093
Lsat_1_v5_gn_1_81560	0.865448	0.2943	0.616858	0.377329	0.127473	0.133742
Lsat_1_v5_gn_1_2440	0.86533	0.188718	0.524167	0.512699	0.181189	0.157515
Lsat_1_v5_gn_9_110040	0.865309	0.321393	0.695044	0.348143	0.0913429	0.163931
Lsat_1_v5_gn_9_25860	0.8653	0.56712	0.692599	0.15469	0.0923306	0.0628924
Lsat_1_v5_gn_2_5900	0.865295	0.28608	0.351723	0.386242	0.317918	0.0539226
Lsat_1_v5_gn_2_95261	0.865178	0.47305	0.536287	0.216121	0.173272	0.0528923
Lsat_1_v5_gn_2_2221	0.865119	0.440424	0.228203	0.240671	0.456641	0.0917517
Lsat_1_v5_gn_4_102060	0.8651	0.418488	0.572314	0.25825	0.151462	0.0674394
Lsat_1_v5_gn_7_27480	0.86498	0.535231	0.719693	0.173708	0.0816377	0.0783435
Lsat_1_v5_gn_3_88960	0.864793	0.607177	0.474504	0.131917	0.214554	0.063033
Lsat_1_v5_gn_8_103420	0.864765	0.33416	0.106371	0.334251	0.659176	0.133728
Lsat_1_v5_gn_8_19061	0.864553	0.555524	0.394444	0.160755	0.277741	0.0692461
Lsat_1_v5_gn_5_180101	0.864546	0.135428	0.195205	0.600136	0.501617	0.0571736
Lsat_1_v5_gn_4_51361	0.864538	0.352917	0.444756	0.315537	0.236478	0.0565619
Lsat_1_v5_gn_2_64920	0.864497	0.342061	0.609523	0.32598	0.130411	0.105327
Lsat_1_v5_gn_5_76940	0.86441	0.271022	0.398657	0.402003	0.273885	0.0644749
Lsat_1_v5_gn_6_12200	0.864297	0.426926	0.402067	0.250208	0.270797	0.0504674
Lsat_1_v5_gn_9_13441	0.864263	0.643206	0.375521	0.113398	0.294064	0.105196
Lsat_1_v5_gn_8_133220	0.864184	0.57943	0.658636	0.146462	0.106172	0.0549868
Lsat_1_v5_gn_2_36221	0.864175	0.446588	0.379325	0.234556	0.290497	0.0534424
Lsat_1_v5_gn_1_6760	0.864148	0.241531	0.365759	0.437569	0.302825	0.0649662
Lsat_1_v5_gn_0_32880	0.864066	0.135773	0.391662	0.59864	0.279414	0.133029
Lsat_1_v5_gn_4_32541	0.863961	0.636202	0.51827	0.116509	0.183395	0.0605528
Lsat_1_v5_gn_9_114260	0.863747	0.244765	0.263267	0.432749	0.410018	0.0503878
Lsat_1_v5_gn_9_89201	0.863726	0.463282	0.702035	0.221342	0.0875625	0.0954527
Lsat_1_v5_gn_7_60761	0.863679	0.186122	0.147479	0.513596	0.576724	0.0529186
Lsat_1_v5_gn_9_48081	0.863612	0.406691	0.711461	0.265855	0.0838973	0.12476
Lsat_1_v5_gn_3_63340	0.863577	0.709551	0.318836	0.0845941	0.347854	0.17602
Lsat_1_v5_gn_4_2061	0.863538	0.169381	0.181671	0.539529	0.520147	0.0502722
Lsat_1_v5_gn_7_54241	0.863412	0.262441	0.60639	0.410412	0.131051	0.148319
Lsat_1_v5_gn_8_164760	0.863333	0.467723	0.553081	0.217552	0.160895	0.055289
Lsat_1_v5_gn_6_110841	0.863254	0.627111	0.505741	0.12036	0.190827	0.0610727
Lsat_1_v5_gn_8_15101	0.863188	0.280195	0.535813	0.389229	0.171297	0.10334
Lsat_1_v5_gn_7_116201	0.863164	0.517087	0.694056	0.183219	0.0903541	0.0750748
Lsat_1_v5_gn_1_115560	0.863152	0.580905	0.414408	0.144598	0.258744	0.0705062
Lsat_1_v5_gn_6_11820	0.863092	0.45535	0.542552	0.226402	0.167018	0.0555185
Lsat_1_v5_gn_5_163821	0.86299	0.506839	0.323301	0.189771	0.342271	0.0763667
Lsat_1_v5_gn_1_8340	0.862879	0.637784	0.354412	0.114855	0.311433	0.112308
Lsat_1_v5_gn_3_34300	0.862821	0.289183	0.272811	0.37844	0.397108	0.050273
Lsat_1_v5_gn_6_7400	0.8627	0.504369	0.685607	0.191072	0.0934695	0.0759526
Lsat_1_v5_gn_4_10521	0.862576	0.538772	0.351425	0.168771	0.313788	0.0767049
Lsat_1_v5_gn_3_59180	0.862212	0.405605	0.638087	0.26469	0.114168	0.0910865
Lsat_1_v5_gn_1_69940	0.862189	0.250236	0.111853	0.423123	0.642947	0.0866945
Lsat_1_v5_gn_5_130361	0.862141	0.305208	0.629188	0.359769	0.118398	0.133937
Lsat_1_v5_gn_5_57121	0.862124	0.19978	0.549252	0.490531	0.161886	0.162766
Lsat_1_v5_gn_4_11900	0.861686	0.354293	0.651227	0.309639	0.107633	0.118876
Lsat_1_v5_gn_1_55841	0.861537	0.575625	0.242136	0.145947	0.432122	0.144979
Lsat_1_v5_gn_1_41620	0.861428	0.0839069	0.271652	0.708033	0.396026	0.128201
Lsat_1_v5_gn_8_114360	0.861248	0.276167	0.674479	0.390477	0.0971155	0.182181
Lsat_1_v5_gn_8_72880	0.861206	0.671808	0.626326	0.0982172	0.119015	0.0517288
Lactuca_sativa_newGene_3479	0.861173	0.284214	0.186057	0.381174	0.509155	0.0622341
Lsat_1_v5_gn_1_57580	0.861171	0.286405	0.689551	0.378706	0.0908812	0.185241
Lsat_1_v5_gn_6_3180	0.861114	0.343716	0.701562	0.318855	0.0861598	0.153857
Lactuca_sativa_newGene_1575	0.861067	0.436518	0.362907	0.238035	0.300598	0.0541963
Lsat_1_v5_gn_7_9220	0.861067	0.606788	0.671837	0.128714	0.098108	0.0534775
Lsat_1_v5_gn_5_157981	0.861029	0.38928	0.579766	0.276878	0.143136	0.0771037
Lsat_1_v5_gn_2_85541	0.860851	0.54679	0.55063	0.161995	0.159697	0.0500108
Lsat_1_v5_gn_9_114341	0.86079	0.475928	0.713082	0.208327	0.0816902	0.095503
Lsat_1_v5_gn_2_58761	0.860751	0.11733	0.196712	0.62901	0.492518	0.063992
Lsat_1_v5_gn_7_107440	0.860585	0.368924	0.719564	0.294321	0.0792647	0.15042
Lsat_1_v5_gn_5_106560	0.860439	0.416665	0.549941	0.252966	0.15967	0.0630422
Lsat_1_v5_gn_3_17861	0.860419	0.588817	0.661703	0.137602	0.102016	0.0542618
Lsat_1_v5_gn_8_129400	0.860275	0.31024	0.493962	0.351297	0.195144	0.0768754
Lsat_1_v5_gn_9_53021	0.860179	0.213581	0.209837	0.467503	0.472713	0.0500197
Lsat_1_v5_gn_4_49900	0.860145	0.671884	0.37829	0.0974532	0.285211	0.117511
Lsat_1_v5_gn_4_150800	0.860107	0.474661	0.728906	0.208357	0.0758111	0.103318
Lsat_1_v5_gn_9_41741	0.859952	0.513605	0.274782	0.181715	0.389838	0.0971357
Lsat_1_v5_gn_9_8221	0.859913	0.445183	0.357643	0.229785	0.303689	0.055936
Lsat_1_v5_gn_2_2680	0.859894	0.591544	0.484378	0.135646	0.201262	0.0584408
Lsat_1_v5_gn_9_62260	0.859888	0.136123	0.162629	0.590639	0.544018	0.0516144
Lsat_1_v5_gn_3_32681	0.859845	0.369775	0.594904	0.292408	0.133814	0.0883856
Lsat_1_v5_gn_3_7200	0.859809	0.256385	0.598929	0.411386	0.131664	0.148201
Lsat_1_v5_gn_2_38801	0.85977	0.408029	0.303737	0.259102	0.357353	0.0591404
Lsat_1_v5_gn_3_123460	0.859721	0.418611	0.690855	0.250366	0.0894535	0.108421
Lsat_1_v5_gn_8_23180	0.85971	0.56881	0.644529	0.147967	0.109184	0.0544701
Lsat_1_v5_gn_7_112301	0.859658	0.205122	0.383901	0.478432	0.279515	0.0829181
Lsat_1_v5_gn_3_132141	0.859375	0.680652	0.570489	0.0933095	0.146688	0.0598197
Lsat_1_v5_gn_5_4561	0.859262	0.524774	0.614274	0.173792	0.123329	0.0559965
Lsat_1_v5_gn_4_94000	0.859237	0.21021	0.395867	0.470512	0.268547	0.084603
Lsat_1_v5_gn_8_32640	0.859205	0.349524	0.569472	0.310239	0.147092	0.0869153
Lsat_1_v5_gn_6_80401	0.859114	0.307834	0.471106	0.351906	0.209627	0.071464
Lsat_1_v5_gn_7_18081	0.859024	0.351941	0.453391	0.30766	0.222425	0.057982
Lsat_1_v5_gn_8_43101	0.85889	0.143015	0.309274	0.576224	0.350017	0.0890692
Lsat_1_v5_gn_1_123061	0.858849	0.0969909	0.0987338	0.670884	0.666753	0.0500149
Lactuca_sativa_newGene_563	0.858757	0.510546	0.612501	0.182315	0.123784	0.0577478
Lsat_1_v5_gn_4_138400	0.858752	0.321561	0.593618	0.337063	0.133491	0.107905
Lsat_1_v5_gn_9_23940	0.8587	0.474734	0.745035	0.206527	0.0700068	0.111604
Lsat_1_v5_gn_8_144820	0.858621	0.65364	0.581031	0.104261	0.14012	0.0541745
Lsat_1_v5_gn_1_57641	0.858445	0.5296	0.305997	0.169872	0.352745	0.089665
Lsat_1_v5_gn_3_7501	0.85828	0.233435	0.526865	0.437535	0.17139	0.12538
Lsat_1_v5_gn_5_38041	0.858237	0.671723	0.662638	0.096229	0.100066	0.0500716
Lsat_1_v5_gn_8_38881	0.858191	0.147653	0.243718	0.566698	0.424233	0.0649109
Lsat_1_v5_gn_7_57121	0.858148	0.271258	0.482227	0.390832	0.200597	0.0873963
Lsat_1_v5_gn_2_104661	0.857899	0.535392	0.680819	0.165718	0.0922912	0.0668088
Lsat_1_v5_gn_4_108940	0.857862	0.567095	0.564173	0.147104	0.148755	0.0500063
Lactuca_sativa_newGene_3985	0.857786	0.503818	0.224996	0.185586	0.447768	0.119732
Lsat_1_v5_gn_8_24401	0.857608	0.293234	0.537395	0.365111	0.164189	0.0979063
Lsat_1_v5_gn_4_61921	0.857579	0.150436	0.44405	0.560723	0.227523	0.147207
Lsat_1_v5_gn_9_107600	0.857555	0.440264	0.211574	0.230369	0.465629	0.1002
Lsat_1_v5_gn_3_114861	0.857518	0.355427	0.293168	0.302042	0.365034	0.0534753
Lsat_1_v5_gn_5_164060	0.857516	0.367561	0.642186	0.290865	0.108586	0.108266
Lsat_1_v5_gn_8_164660	0.857498	0.312681	0.507646	0.344168	0.182748	0.0800716
Lsat_1_v5_gn_2_125100	0.857466	0.196914	0.277843	0.486366	0.382083	0.05815
Lsat_1_v5_gn_8_89041	0.857423	0.120299	0.3656	0.617263	0.292507	0.135037
Lsat_1_v5_gn_4_62881	0.85718	0.332291	0.568741	0.32376	0.145515	0.0932195
Lsat_1_v5_gn_8_86760	0.857148	0.274304	0.606092	0.385605	0.125627	0.140259
Lactuca_sativa_newGene_2526	0.857127	0.20682	0.213617	0.471537	0.462043	0.0500654
Lsat_1_v5_gn_6_114340	0.856962	0.587283	0.700013	0.135208	0.0843203	0.0606463
Lsat_1_v5_gn_1_100060	0.856943	0.53355	0.550107	0.165813	0.155928	0.0501997
Lsat_1_v5_gn_1_14981	0.856894	0.131773	0.444036	0.59369	0.226628	0.167513
Lsat_1_v5_gn_8_126340	0.856804	0.136386	0.447706	0.584799	0.223752	0.164322
Lsat_1_v5_gn_1_41900	0.856735	0.222713	0.344254	0.448977	0.311405	0.0653373
Lsat_1_v5_gn_7_22540	0.85622	0.542374	0.151481	0.15974	0.556524	0.208475
Lsat_1_v5_gn_8_68280	0.85616	0.122362	0.521649	0.61094	0.17231	0.234231
Lsat_1_v5_gn_6_64280	0.856085	0.557317	0.712605	0.150893	0.0793217	0.0701369
Lsat_1_v5_gn_8_58821	0.855883	0.355933	0.584053	0.299064	0.135938	0.0896321
Lsat_1_v5_gn_0_18260	0.855866	0.605883	0.426678	0.124635	0.238607	0.0738905
Lsat_1_v5_gn_6_69260	0.855682	0.349462	0.730723	0.304821	0.0730954	0.170648
Lsat_1_v5_gn_9_24741	0.855637	0.583013	0.641174	0.136267	0.107638	0.0526513
Lsat_1_v5_gn_5_51421	0.855593	0.525759	0.363537	0.169139	0.291623	0.069858
Lsat_1_v5_gn_6_101001	0.855571	0.137967	0.0714506	0.579725	0.735819	0.0713732
Lsat_1_v5_gn_9_110520	0.855416	0.243999	0.365022	0.419081	0.290007	0.0641458
Lsat_1_v5_gn_6_108340	0.855389	0.409813	0.533275	0.251429	0.164326	0.0612056
Lsat_1_v5_gn_7_11581	0.855375	0.215975	0.154063	0.455735	0.550574	0.0565362
Lsat_1_v5_gn_3_88120	0.855353	0.3327	0.386139	0.320474	0.271224	0.0523581
Lactuca_sativa_newGene_2870	0.855297	0.457259	0.502287	0.214765	0.183715	0.0514676
Lsat_1_v5_gn_7_99000	0.855135	0.213776	0.10463	0.458338	0.647092	0.077041
Lsat_1_v5_gn_2_39121	0.854948	0.719702	0.506532	0.0763294	0.180563	0.0873897
Lsat_1_v5_gn_5_61901	0.854716	0.449581	0.546428	0.219655	0.155809	0.0568185
Lsat_1_v5_gn_5_87280	0.854482	0.634123	0.58174	0.109979	0.135891	0.052136
Lsat_1_v5_gn_4_55580	0.854222	0.354908	0.695849	0.297499	0.084305	0.14344
Lsat_1_v5_gn_9_120721	0.854108	0.460331	0.354704	0.21105	0.297517	0.0586066
Lsat_1_v5_gn_4_105160	0.853943	0.497887	0.469433	0.185046	0.204376	0.0505848
Lsat_1_v5_gn_4_85240	0.853912	0.420106	0.381999	0.241142	0.272723	0.0511177
Lactuca_sativa_newGene_1378	0.853874	0.359624	0.124454	0.292625	0.602879	0.127406
Lsat_1_v5_gn_6_88480	0.853826	0.278104	0.29329	0.375701	0.358822	0.050231
Lsat_1_v5_gn_3_116161	0.853723	0.469737	0.660261	0.203894	0.0979897	0.0778413
Lactuca_sativa_newGene_2013	0.853693	0.183334	0.564027	0.50007	0.144782	0.187637
Lsat_1_v5_gn_2_118081	0.853689	0.744376	0.413257	0.068104	0.246302	0.141548
Lactuca_sativa_newGene_5092	0.853659	0.560976	0.631559	0.146449	0.110533	0.053827
Lsat_1_v5_gn_3_24241	0.853594	0.520724	0.330316	0.170097	0.320078	0.0781161
Lsat_1_v5_gn_3_7441	0.853578	0.462937	0.519019	0.208527	0.171139	0.052274
Lsat_1_v5_gn_4_56881	0.853576	0.347522	0.661083	0.303439	0.0975488	0.127486
Lsat_1_v5_gn_9_25421	0.853561	0.327447	0.112321	0.322869	0.627525	0.123168
Lsat_1_v5_gn_4_50380	0.853467	0.334294	0.0706691	0.315977	0.735366	0.198445
Lactuca_sativa_newGene_2744	0.853432	0.608108	0.544312	0.121495	0.155746	0.0530537
Lsat_1_v5_gn_2_32900	0.853387	0.575041	0.620102	0.138475	0.115669	0.0515574
Lactuca_sativa_newGene_5356	0.853307	0.671599	0.344587	0.0930773	0.305812	0.134924
Lsat_1_v5_gn_9_39661	0.853146	0.522081	0.675344	0.168779	0.0914875	0.0684675
Lsat_1_v5_gn_2_118780	0.853143	0.413634	0.716191	0.245256	0.0766112	0.123995
Lsat_1_v5_gn_2_43101	0.853115	0.183938	0.0978403	0.498141	0.659648	0.0700751
Lsat_1_v5_gn_2_104600	0.85305	0.715368	0.652686	0.0768399	0.100736	0.0535788
Lsat_1_v5_gn_8_111480	0.852838	0.297387	0.491114	0.352791	0.188251	0.0803576
Lsat_1_v5_gn_9_110121	0.852795	0.404953	0.72029	0.251809	0.0750951	0.13078
Lsat_1_v5_gn_5_168460	0.852788	0.506222	0.727201	0.178347	0.072884	0.0905768
Lsat_1_v5_gn_5_107901	0.852765	0.67108	0.647482	0.0929441	0.102779	0.0504748
Lsat_1_v5_gn_5_139320	0.852755	0.503658	0.596323	0.179955	0.126805	0.0563359
Lsat_1_v5_gn_5_162620	0.852672	0.376088	0.245429	0.276091	0.412621	0.0662367
Lsat_1_v5_gn_4_27820	0.852642	0.73014	0.642379	0.0719045	0.104921	0.0570995
Lsat_1_v5_gn_1_22481	0.852482	0.337441	0.60425	0.311406	0.122613	0.105151
Lsat_1_v5_gn_6_88261	0.852477	0.238268	0.56768	0.421313	0.141625	0.143303
Lsat_1_v5_gn_6_102081	0.85243	0.395767	0.22832	0.258897	0.434099	0.0770391
Lsat_1_v5_gn_6_51440	0.852365	0.558026	0.722453	0.146859	0.0741955	0.0728971
Lsat_1_v5_gn_6_97980	0.852363	0.375015	0.507297	0.276589	0.177191	0.0631253
Lsat_1_v5_gn_7_104600	0.852337	0.402073	0.154051	0.253542	0.545344	0.121889
Lsat_1_v5_gn_9_67461	0.8523	0.39539	0.687301	0.259032	0.0863843	0.117209
Lsat_1_v5_gn_0_9420	0.852223	0.694791	0.649937	0.0835791	0.101344	0.0517728
Lsat_1_v5_gn_5_117561	0.85221	0.684121	0.470425	0.08753	0.201585	0.085783
Lsat_1_v5_gn_8_112480	0.852145	0.506683	0.466103	0.177343	0.204533	0.0511898
Lactuca_sativa_newGene_3321	0.852131	0.210899	0.0685812	0.45713	0.740535	0.117026
Lsat_1_v5_gn_4_65660	0.852103	0.543836	0.705048	0.154693	0.0798742	0.0713302
Lsat_1_v5_gn_8_38520	0.851928	0.149553	0.116692	0.552496	0.615534	0.0530055
Lsat_1_v5_gn_4_175061	0.851909	0.561669	0.725698	0.144397	0.0729578	0.0729466
Lsat_1_v5_gn_9_109741	0.851895	0.204961	0.440248	0.465065	0.222991	0.103932
Lsat_1_v5_gn_3_51801	0.851771	0.440332	0.151564	0.22277	0.548698	0.144041
Lsat_1_v5_gn_9_24061	0.85175	0.22229	0.550362	0.440939	0.150593	0.145316
Lsat_1_v5_gn_6_95261	0.851711	0.433635	0.496494	0.227744	0.183429	0.0528809
Lsat_1_v5_gn_1_24560	0.851619	0.223587	0.0929497	0.438983	0.669268	0.090966
Lsat_1_v5_gn_3_117620	0.851393	0.724699	0.475016	0.0730379	0.197438	0.10115
Lsat_1_v5_gn_3_68721	0.851294	0.397986	0.556009	0.255478	0.146964	0.0684932
Lsat_1_v5_gn_4_52000	0.851291	0.397908	0.66502	0.255538	0.0944488	0.105291
Lsat_1_v5_gn_5_175081	0.851156	0.0847586	0.397275	0.689938	0.255878	0.210909
Lsat_1_v5_gn_3_74801	0.851031	0.611572	0.158225	0.117877	0.535956	0.252861
Lsat_1_v5_gn_8_150960	0.850971	0.382483	0.447465	0.26811	0.216478	0.0532044
Lsat_1_v5_gn_3_48941	0.850911	0.079561	0.104421	0.704176	0.640723	0.0535588
Lsat_1_v5_gn_2_71561	0.850645	0.599698	0.703185	0.12335	0.0797662	0.0590967
Lsat_1_v5_gn_5_103680	0.850641	0.090431	0.383798	0.674139	0.266517	0.189619
Lsat_1_v5_gn_9_86000	0.850606	0.34225	0.143084	0.303957	0.561836	0.102731
Lsat_1_v5_gn_7_74540	0.850579	0.415175	0.7045	0.240588	0.07928	0.116857
Lsat_1_v5_gn_7_18261	0.850509	0.356655	0.131423	0.290369	0.58353	0.119137
Lsat_1_v5_gn_5_185801	0.850283	0.218714	0.364474	0.443259	0.282948	0.0716816
Lsat_1_v5_gn_5_71601	0.850239	0.190214	0.43505	0.483696	0.224785	0.110784
Lsat_1_v5_gn_2_34521	0.850207	0.31763	0.645738	0.327512	0.10176	0.135767
Lactuca_sativa_newGene_7058	0.850112	0.185519	0.220434	0.490558	0.440649	0.0518131
Lsat_1_v5_gn_2_129760	0.850092	0.0792988	0.160678	0.703723	0.530208	0.0745096
Lsat_1_v5_gn_3_77021	0.850079	0.265526	0.70318	0.384038	0.0794785	0.213194
Lsat_1_v5_gn_3_36380	0.849921	0.366571	0.123047	0.28055	0.599111	0.132586
Lsat_1_v5_gn_1_76940	0.849907	0.600412	0.333435	0.122394	0.311376	0.105327
Lsat_1_v5_gn_3_22660	0.849817	0.566827	0.647446	0.139639	0.100766	0.0550751
Lsat_1_v5_gn_2_41661	0.849749	0.432477	0.700759	0.226105	0.0801442	0.107222
Lsat_1_v5_gn_3_112881	0.849722	0.328744	0.306737	0.31568	0.337953	0.0504397
Lsat_1_v5_gn_3_89261	0.849715	0.277601	0.198611	0.369558	0.470442	0.0577289
Lsat_1_v5_gn_1_10481	0.849539	0.595173	0.571994	0.124686	0.136621	0.0504047
Lsat_1_v5_gn_2_2021	0.849431	0.666722	0.619984	0.0926045	0.112679	0.0518048
Lsat_1_v5_gn_6_45560	0.849283	0.431043	0.0861162	0.226598	0.68341	0.233386
Lsat_1_v5_gn_1_22360	0.849269	0.204721	0.531615	0.460924	0.159013	0.148393
Lsat_1_v5_gn_8_77941	0.84919	0.339662	0.249836	0.304308	0.401365	0.0579523
Lsat_1_v5_gn_7_40921	0.849113	0.111315	0.0857623	0.622428	0.684107	0.053215
Lsat_1_v5_gn_5_2601	0.849099	0.550223	0.710553	0.148121	0.0765132	0.0713201
Lactuca_sativa_newGene_4885	0.849083	0.295313	0.461018	0.349037	0.204432	0.0725556
Lactuca_sativa_newGene_6676	0.848849	0.104484	0.474451	0.637271	0.194855	0.229008
Lsat_1_v5_gn_8_83761	0.848829	0.334095	0.55748	0.309116	0.143829	0.0884932
Lsat_1_v5_gn_7_30901	0.848762	0.162977	0.132705	0.524099	0.578137	0.0521441
Lsat_1_v5_gn_7_17700	0.848737	0.726982	0.591783	0.0711695	0.125716	0.0659646
Lsat_1_v5_gn_1_58201	0.848725	0.192974	0.639659	0.477013	0.103359	0.233028
Lsat_1_v5_gn_8_86441	0.848638	0.611934	0.746995	0.115836	0.065444	0.066765
Lsat_1_v5_gn_7_20981	0.848589	0.294917	0.490727	0.348683	0.183706	0.0811111
Lsat_1_v5_gn_7_31141	0.848553	0.266988	0.698015	0.379846	0.0804791	0.207685
Lsat_1_v5_gn_2_68461	0.848433	0.571089	0.752526	0.136118	0.0639274	0.0794956
Lsat_1_v5_gn_3_56401	0.848427	0.220619	0.0629173	0.437562	0.756526	0.136511
Lsat_1_v5_gn_4_122061	0.848412	0.560848	0.642687	0.1416	0.101842	0.055192
Lsat_1_v5_gn_0_29801	0.848358	0.266903	0.07533	0.37963	0.713107	0.140048
Lactuca_sativa_newGene_2976	0.848293	0.423796	0.146884	0.230871	0.55107	0.139488
Lsat_1_v5_gn_5_127861	0.848234	0.288029	0.646549	0.355593	0.100083	0.154884
Lsat_1_v5_gn_8_99561	0.848187	0.187594	0.470517	0.484136	0.196776	0.129319
Lsat_1_v5_gn_3_54841	0.847962	0.433009	0.686207	0.223442	0.084355	0.100266
Lsat_1_v5_gn_9_89401	0.847931	0.588906	0.370491	0.12649	0.274249	0.0860579
Lsat_1_v5_gn_2_124461	0.847766	0.736689	0.606407	0.0679412	0.117783	0.0652471
Lsat_1_v5_gn_2_12080	0.847737	0.577618	0.446293	0.132088	0.213345	0.0626417
Lsat_1_v5_gn_4_111840	0.847632	0.639767	0.358287	0.102563	0.284712	0.111412
Lsat_1_v5_gn_4_28820	0.847532	0.594868	0.609983	0.123194	0.115906	0.050176
Lactuca_sativa_newGene_2208	0.84735	0.609032	0.643051	0.116215	0.100971	0.0509251
Lsat_1_v5_gn_5_95300	0.847183	0.524606	0.441839	0.161076	0.215919	0.0549776
Lsat_1_v5_gn_9_53861	0.847029	0.392826	0.197655	0.253947	0.467284	0.0895676
Lsat_1_v5_gn_8_126280	0.846778	0.124537	0.302455	0.590914	0.337861	0.099444
Lsat_1_v5_gn_0_32100	0.846763	0.38972	0.479185	0.256171	0.189287	0.0559797
Lsat_1_v5_gn_5_21340	0.846597	0.113085	0.298621	0.614509	0.341624	0.107698
Lsat_1_v5_gn_5_48320	0.846543	0.36486	0.0896425	0.277269	0.669873	0.178055
Lsat_1_v5_gn_1_103040	0.84648	0.136281	0.088908	0.567528	0.671704	0.0586807
Lsat_1_v5_gn_8_6281	0.846435	0.132199	0.519587	0.575247	0.163326	0.217802
Lsat_1_v5_gn_3_129500	0.84642	0.0778409	0.275469	0.702628	0.366696	0.14084
Lsat_1_v5_gn_5_58981	0.846414	0.413291	0.650373	0.236625	0.0973011	0.0929708
Lsat_1_v5_gn_7_31600	0.846385	0.54864	0.487054	0.146455	0.183672	0.0527476
Lsat_1_v5_gn_0_11741	0.846302	0.0816687	0.0949289	0.691256	0.656035	0.0510954
Lsat_1_v5_gn_8_124140	0.846183	0.398466	0.449704	0.248183	0.209006	0.0519696
Lsat_1_v5_gn_9_81901	0.846073	0.0837499	0.159374	0.685047	0.525608	0.0702156
Lsat_1_v5_gn_5_75460	0.845885	0.557008	0.272797	0.141392	0.368881	0.116344
Lsat_1_v5_gn_9_121401	0.845877	0.59293	0.477103	0.122814	0.189683	0.0598652
Lactuca_sativa_newGene_5405	0.845876	0.452352	0.201593	0.20675	0.459671	0.111128
Lsat_1_v5_gn_5_121181	0.845784	0.208538	0.153315	0.449694	0.535516	0.0553462
Lsat_1_v5_gn_2_48320	0.845693	0.571461	0.516302	0.133529	0.164555	0.0522246
Lsat_1_v5_gn_4_160900	0.845398	0.745075	0.434101	0.0647931	0.219443	0.130918
Lsat_1_v5_gn_0_29720	0.845387	0.237049	0.666809	0.411069	0.0901395	0.209672
Lactuca_sativa_newGene_4660	0.845376	0.20089	0.117231	0.459844	0.603682	0.0652991
Lsat_1_v5_gn_8_16161	0.845366	0.158959	0.174016	0.525125	0.500408	0.0504408
Lsat_1_v5_gn_1_8980	0.845307	0.408491	0.68034	0.238982	0.0850356	0.107808
Lsat_1_v5_gn_9_115420	0.845262	0.487241	0.737922	0.182321	0.0666451	0.10265
Lsat_1_v5_gn_1_32200	0.845114	0.394343	0.251365	0.250139	0.392852	0.0688674
Lsat_1_v5_gn_8_138880	0.845039	0.523196	0.360137	0.159776	0.279368	0.0701158
Lsat_1_v5_gn_2_84821	0.844997	0.0864772	0.100788	0.67594	0.639777	0.0511127
Lsat_1_v5_gn_5_131321	0.844703	0.415966	0.147918	0.232348	0.543217	0.134324
Lactuca_sativa_newGene_5099	0.84464	0.709565	0.531709	0.0747469	0.154407	0.0759573
Lsat_1_v5_gn_8_58500	0.844584	0.583012	0.170297	0.126687	0.50506	0.215251
Lsat_1_v5_gn_8_28901	0.844524	0.0594513	0.177102	0.766322	0.494121	0.115
Lsat_1_v5_gn_1_102980	0.844512	0.120852	0.253181	0.594727	0.389685	0.0815302
Lsat_1_v5_gn_8_114320	0.844491	0.664134	0.654448	0.0906422	0.0944416	0.0500799
Lsat_1_v5_gn_9_23680	0.844476	0.436564	0.582262	0.216496	0.126975	0.0656139
Lsat_1_v5_gn_8_110501	0.844452	0.339494	0.403472	0.297517	0.241873	0.0533089
Lsat_1_v5_gn_6_41901	0.844375	0.530774	0.39801	0.154693	0.246173	0.0630278
Lsat_1_v5_gn_9_9601	0.844172	0.463883	0.720825	0.196711	0.0710831	0.103789
Lsat_1_v5_gn_5_103561	0.844088	0.305419	0.169495	0.330667	0.50553	0.0737702
Lsat_1_v5_gn_8_111061	0.844088	0.42996	0.775363	0.220922	0.0574687	0.154203
Lsat_1_v5_gn_4_163920	0.844066	0.323735	0.0883767	0.312146	0.669438	0.153205
Lsat_1_v5_gn_2_92220	0.843872	0.289704	0.429827	0.346966	0.220756	0.0665521
Lsat_1_v5_gn_4_4460	0.843778	0.689097	0.407332	0.0811197	0.237934	0.112573
Lsat_1_v5_gn_1_124781	0.843543	0.37414	0.416207	0.265009	0.230698	0.0513736
Lsat_1_v5_gn_4_74380	0.843364	0.627969	0.673386	0.104741	0.0865125	0.0517296
Lsat_1_v5_gn_7_100541	0.843205	0.331648	0.521814	0.30319	0.158789	0.0780066
Lsat_1_v5_gn_4_29400	0.84319	0.171254	0.245559	0.501194	0.396861	0.0580642
Lsat_1_v5_gn_3_90401	0.843171	0.0631323	0.343668	0.748662	0.291767	0.230277
Lsat_1_v5_gn_7_33641	0.84298	0.200838	0.0695637	0.455946	0.72435	0.108874
Lsat_1_v5_gn_4_139881	0.842893	0.09979	0.290625	0.638866	0.344472	0.117657
Lsat_1_v5_gn_8_144000	0.842844	0.296397	0.435421	0.338232	0.215365	0.066087
Lsat_1_v5_gn_3_24720	0.842824	0.474277	0.712632	0.188177	0.0729833	0.0959253
Lsat_1_v5_gn_8_5181	0.842564	0.463275	0.658526	0.195304	0.091673	0.0791889
Lsat_1_v5_gn_1_9421	0.842507	0.41251	0.305427	0.232263	0.328283	0.0595823
Lsat_1_v5_gn_8_21260	0.842399	0.559242	0.49865	0.137106	0.172022	0.0526678
Lsat_1_v5_gn_2_106861	0.842353	0.479722	0.68082	0.18407	0.0832805	0.0816275
Lsat_1_v5_gn_8_30681	0.842336	0.531818	0.431919	0.152151	0.217335	0.0572756
Lsat_1_v5_gn_1_106300	0.84217	0.482606	0.663061	0.181991	0.0897021	0.0750686
Lsat_1_v5_gn_4_12341	0.842164	0.300196	0.416568	0.333204	0.228697	0.0613605
Lsat_1_v5_gn_9_64821	0.842104	0.662638	0.718626	0.0898253	0.0708756	0.0529048
Lsat_1_v5_gn_4_24140	0.842075	0.168288	0.515676	0.504149	0.161318	0.17167
Lsat_1_v5_gn_3_54620	0.842068	0.481567	0.535198	0.182558	0.149979	0.0520786
Lsat_1_v5_gn_4_95900	0.842051	0.0783293	0.298527	0.694795	0.334785	0.155016
Lsat_1_v5_gn_5_91980	0.841927	0.117937	0.141022	0.596634	0.551157	0.0515451
Lsat_1_v5_gn_6_12161	0.841897	0.361468	0.756548	0.273822	0.0608687	0.182794
Lsat_1_v5_gn_8_152120	0.841836	0.270217	0.389267	0.365468	0.250001	0.06272
Lsat_1_v5_gn_5_25740	0.841719	0.672698	0.228602	0.0858612	0.415974	0.222449
Lsat_1_v5_gn_2_47881	0.84169	0.543465	0.744269	0.145013	0.0637332	0.0849815
Lsat_1_v5_gn_4_148381	0.841556	0.141748	0.564422	0.54921	0.133662	0.237936
Lsat_1_v5_gn_4_85361	0.841556	0.0956137	0.060194	0.647	0.759115	0.0622796
Lsat_1_v5_gn_6_59920	0.841367	0.141772	0.190001	0.548857	0.469142	0.0546079
Lsat_1_v5_gn_6_75921	0.841325	0.402905	0.0919987	0.238316	0.6558	0.200094
Lsat_1_v5_gn_4_151381	0.841298	0.604722	0.210636	0.113681	0.43939	0.188756
Lactuca_sativa_newGene_3702	0.841285	0.574762	0.771424	0.128138	0.0575535	0.0859786
Lsat_1_v5_gn_4_31401	0.841275	0.485438	0.461756	0.179209	0.194894	0.0504061
Lsat_1_v5_gn_4_98501	0.84126	0.294999	0.499035	0.33732	0.170613	0.0836819
Lsat_1_v5_gn_7_73381	0.8412	0.494225	0.63503	0.173552	0.100292	0.0649558
Lsat_1_v5_gn_1_8600	0.841171	0.755142	0.57102	0.0609744	0.129941	0.0805121
Lsat_1_v5_gn_2_69461	0.841122	0.447912	0.385379	0.204339	0.252282	0.0529608
Lsat_1_v5_gn_9_22041	0.841036	0.176425	0.4844	0.489405	0.179624	0.145667
Lsat_1_v5_gn_6_28301	0.841027	0.464395	0.692682	0.192824	0.0785377	0.0911562
Lsat_1_v5_gn_5_103641	0.841019	0.407998	0.217461	0.233916	0.429609	0.0854061
Lsat_1_v5_gn_2_14061	0.84097	0.241825	0.133726	0.397944	0.563344	0.070284
Lactuca_sativa_newGene_5046	0.840963	0.599332	0.399997	0.115939	0.240173	0.0797212
Lsat_1_v5_gn_9_111260	0.840961	0.08121	0.237429	0.684693	0.403443	0.112154
Lsat_1_v5_gn_2_82040	0.840929	0.38187	0.698362	0.254954	0.0766275	0.129998
Lsat_1_v5_gn_7_19121	0.840923	0.742344	0.63942	0.0639591	0.0982958	0.0599388
Lsat_1_v5_gn_4_180660	0.840911	0.480265	0.397498	0.182165	0.242108	0.0550928
Lsat_1_v5_gn_7_33840	0.840826	0.286309	0.385426	0.345993	0.251856	0.0586273
Lsat_1_v5_gn_2_1901	0.840814	0.450531	0.704854	0.202141	0.0745087	0.101666
Lactuca_sativa_newGene_2369	0.84073	0.512924	0.687046	0.161637	0.0802883	0.0740539
Lsat_1_v5_gn_9_22581	0.840719	0.319234	0.123926	0.311693	0.582302	0.107691
Lsat_1_v5_gn_1_29301	0.840681	0.656259	0.6504	0.0914431	0.0937279	0.0500289
Lsat_1_v5_gn_5_2060	0.840616	0.780554	0.435068	0.0557124	0.212969	0.155223
Lactuca_sativa_newGene_3809	0.840603	0.588508	0.352263	0.120811	0.280279	0.0926459
Lsat_1_v5_gn_4_90280	0.840566	0.450421	0.304032	0.201934	0.326832	0.0675082
Lsat_1_v5_gn_4_127741	0.840478	0.431247	0.734153	0.215606	0.0659127	0.125697
Lsat_1_v5_gn_1_58241	0.840463	0.176645	0.63957	0.488117	0.0979437	0.252325
Lactuca_sativa_newGene_2647	0.84046	0.607856	0.214502	0.111638	0.43272	0.187341
Lsat_1_v5_gn_6_41860	0.840368	0.590622	0.665038	0.119613	0.0879378	0.0544634
Lsat_1_v5_gn_7_104060	0.840301	0.0646839	0.12719	0.738649	0.575056	0.0734999
Lsat_1_v5_gn_0_6981	0.840101	0.423138	0.612637	0.221181	0.109228	0.0768178
Lsat_1_v5_gn_3_29060	0.840101	0.200563	0.61261	0.451625	0.10924	0.204126
Lsat_1_v5_gn_4_176860	0.840093	0.375067	0.726362	0.259591	0.067874	0.151329
Lsat_1_v5_gn_8_102821	0.840051	0.276556	0.617563	0.355559	0.107011	0.145264
Lsat_1_v5_gn_4_50141	0.840016	0.32701	0.633958	0.303072	0.0999744	0.124225
Lsat_1_v5_gn_2_94120	0.839968	0.482486	0.769507	0.179729	0.0576065	0.12232
Lsat_1_v5_gn_2_87721	0.839904	0.318844	0.610083	0.310897	0.110234	0.116733
Lsat_1_v5_gn_5_191140	0.83984	0.418355	0.73073	0.224476	0.0665929	0.130145
Lsat_1_v5_gn_8_148201	0.8398	0.695875	0.603495	0.0769075	0.113152	0.0572012
Lsat_1_v5_gn_5_126500	0.839743	0.392662	0.508752	0.244522	0.163165	0.0599984
Lsat_1_v5_gn_8_83441	0.839739	0.16908	0.264414	0.499018	0.368889	0.0627719
Lsat_1_v5_gn_8_17481	0.839682	0.39189	0.442082	0.24507	0.206817	0.0519039
Lsat_1_v5_gn_2_24040	0.839648	0.0784237	0.0652736	0.691028	0.73548	0.0519595
Lsat_1_v5_gn_3_11501	0.839633	0.625929	0.704968	0.103106	0.0739514	0.0554453
Lsat_1_v5_gn_5_174161	0.839608	0.640319	0.746495	0.0971025	0.0625167	0.0606672
Lsat_1_v5_gn_7_55520	0.839554	0.340929	0.606333	0.289218	0.111679	0.10447
Lsat_1_v5_gn_2_90780	0.839344	0.141812	0.313524	0.545485	0.315383	0.0915368
Lsat_1_v5_gn_2_13401	0.839262	0.735023	0.324451	0.0652577	0.304475	0.191718
Lsat_1_v5_gn_9_45021	0.839253	0.442158	0.530558	0.206269	0.149995	0.0556798
Lsat_1_v5_gn_2_3440	0.839231	0.454175	0.73808	0.197811	0.0644651	0.117007
Lsat_1_v5_gn_8_25560	0.839158	0.405122	0.102932	0.233846	0.625597	0.1824
Lsat_1_v5_gn_8_93421	0.839133	0.165919	0.144821	0.503193	0.539636	0.0509606
Lactuca_sativa_newGene_5780	0.839094	0.567025	0.682275	0.130267	0.0811018	0.0607449
Lsat_1_v5_gn_2_131801	0.839071	0.296305	0.708051	0.332669	0.0727646	0.191633
Lsat_1_v5_gn_6_95660	0.839003	0.54721	0.753886	0.140581	0.0606249	0.0877323
Lsat_1_v5_gn_6_81741	0.838997	0.290601	0.193743	0.338612	0.459729	0.0614864
Lsat_1_v5_gn_4_98481	0.838997	0.725632	0.627787	0.0676628	0.101899	0.0586236
Lsat_1_v5_gn_7_57420	0.838966	0.424725	0.0783418	0.218632	0.690291	0.247713
Lsat_1_v5_gn_4_87081	0.83884	0.701304	0.250511	0.0747417	0.383937	0.225278
Lsat_1_v5_gn_9_24081	0.838783	0.508553	0.225872	0.162344	0.414832	0.121405
Lsat_1_v5_gn_5_33341	0.83861	0.54664	0.345895	0.140544	0.283326	0.0807885
Lsat_1_v5_gn_5_135361	0.838567	0.574964	0.683243	0.125846	0.0805096	0.0595414
Lsat_1_v5_gn_5_44120	0.83855	0.117122	0.0599594	0.592974	0.756322	0.0745033
Lsat_1_v5_gn_5_105641	0.83853	0.0854409	0.320321	0.669114	0.307465	0.156063
Lsat_1_v5_gn_5_34461	0.838452	0.549016	0.629942	0.139131	0.100641	0.0549977
Lsat_1_v5_gn_8_23360	0.83845	0.506314	0.661303	0.163361	0.0882592	0.0685487
Lsat_1_v5_gn_1_40861	0.838446	0.0858334	0.0612164	0.667903	0.750545	0.0567404
Lsat_1_v5_gn_7_93241	0.838431	0.328802	0.365178	0.299095	0.265885	0.0511192
Lsat_1_v5_gn_6_86400	0.838402	0.618224	0.762775	0.105596	0.0585591	0.0699007
Lsat_1_v5_gn_4_47540	0.838343	0.734094	0.553441	0.0651796	0.136687	0.0780381
Lsat_1_v5_gn_5_42581	0.838328	0.248957	0.443979	0.385021	0.203917	0.0838368
Lsat_1_v5_gn_6_15560	0.838289	0.64023	0.696013	0.0963233	0.0761665	0.0527179
Lsat_1_v5_gn_8_109060	0.838154	0.0917156	0.144618	0.651731	0.538419	0.0599322
Lsat_1_v5_gn_4_139120	0.837981	0.430727	0.614449	0.213041	0.106956	0.0751885
Lsat_1_v5_gn_7_20521	0.837899	0.203586	0.0604217	0.443756	0.753378	0.131236
Lsat_1_v5_gn_5_157741	0.837892	0.42292	0.400921	0.218698	0.235578	0.0503671
Lsat_1_v5_gn_8_112080	0.837885	0.625165	0.750168	0.10228	0.0611366	0.0646385
Lsat_1_v5_gn_8_75561	0.837828	0.646119	0.627341	0.0937054	0.101327	0.050287
Lsat_1_v5_gn_1_13581	0.837793	0.295959	0.517751	0.331144	0.155972	0.0895515
Lsat_1_v5_gn_1_20900	0.837731	0.57125	0.643103	0.12703	0.094837	0.0540255
Lsat_1_v5_gn_8_131420	0.837674	0.190854	0.0697957	0.461857	0.716194	0.102397
Lsat_1_v5_gn_4_120601	0.837673	0.0919142	0.139096	0.65049	0.547825	0.0581763
Lsat_1_v5_gn_7_21060	0.837619	0.541304	0.700173	0.142566	0.0745548	0.0705639
Lsat_1_v5_gn_9_122660	0.837608	0.48105	0.100009	0.178182	0.630162	0.242583
Lsat_1_v5_gn_3_135300	0.837562	0.34893	0.401727	0.279129	0.234534	0.0522347
Lsat_1_v5_gn_6_22520	0.837546	0.0949621	0.0610148	0.642507	0.750269	0.0610935
Lsat_1_v5_gn_8_112740	0.837402	0.302321	0.633706	0.323948	0.0984195	0.13815
Lsat_1_v5_gn_3_63660	0.837396	0.201504	0.156661	0.445905	0.515922	0.0535574
Lactuca_sativa_newGene_7426	0.837377	0.548487	0.397885	0.138488	0.237343	0.0667824
Lsat_1_v5_gn_4_72700	0.837296	0.16909	0.25109	0.495022	0.38084	0.0597611
Lsat_1_v5_gn_3_57741	0.837295	0.173111	0.528015	0.488549	0.149637	0.174539
Lsat_1_v5_gn_5_154461	0.837264	0.688533	0.671905	0.0781135	0.0837779	0.0502479
Lsat_1_v5_gn_5_60900	0.837116	0.717683	0.652674	0.0691556	0.090756	0.0538633
Lsat_1_v5_gn_9_77100	0.83707	0.194177	0.271564	0.455977	0.356634	0.057614
Lsat_1_v5_gn_4_78640	0.837005	0.380792	0.774776	0.250757	0.055953	0.18493
Lsat_1_v5_gn_5_187500	0.836992	0.652424	0.365431	0.0907803	0.263759	0.114045
Lsat_1_v5_gn_5_132941	0.836989	0.738927	0.598385	0.0635135	0.113464	0.0676818
Lsat_1_v5_gn_9_15381	0.836904	0.619256	0.357116	0.10415	0.270916	0.102831
Lactuca_sativa_newGene_6567	0.836882	0.316286	0.153842	0.309089	0.519961	0.085219
Lsat_1_v5_gn_6_85001	0.836848	0.163211	0.21821	0.503963	0.421917	0.0549263
Lsat_1_v5_gn_1_91580	0.836762	0.415427	0.512903	0.222982	0.157826	0.0569682
Lsat_1_v5_gn_0_3100	0.836654	0.578057	0.670786	0.122825	0.0838572	0.056915
Lsat_1_v5_gn_8_89861	0.836491	0.478839	0.753753	0.178441	0.0599457	0.114625
Lsat_1_v5_gn_4_18460	0.836444	0.727647	0.539525	0.0661939	0.142504	0.0798748
Lsat_1_v5_gn_9_99081	0.836441	0.0719571	0.0844704	0.707064	0.668742	0.051347
Lsat_1_v5_gn_1_77640	0.836416	0.372204	0.161959	0.257204	0.505355	0.102319
Lsat_1_v5_gn_1_56061	0.836362	0.436391	0.707147	0.207073	0.0718996	0.108664
Lsat_1_v5_gn_9_69640	0.836313	0.659401	0.591169	0.0877851	0.116312	0.0537322
Lsat_1_v5_gn_2_23920	0.836307	0.0775926	0.0661099	0.688756	0.727782	0.0514847
Lsat_1_v5_gn_1_64901	0.836292	0.553883	0.509511	0.134725	0.159374	0.0514298
Lsat_1_v5_gn_8_112021	0.836265	0.192739	0.37658	0.456799	0.253321	0.086256
Lsat_1_v5_gn_1_66921	0.836237	0.684393	0.590672	0.0789918	0.116489	0.0572349
Lsat_1_v5_gn_1_48181	0.836228	0.456393	0.741846	0.192973	0.0625688	0.118109
Lsat_1_v5_gn_6_55380	0.836222	0.56438	0.751113	0.129274	0.0604463	0.0810137
Lsat_1_v5_gn_6_89121	0.836147	0.454003	0.715739	0.194513	0.0693284	0.105403
Lactuca_sativa_newGene_5529	0.836131	0.354374	0.0881111	0.272315	0.658248	0.173775
Lsat_1_v5_gn_1_64300	0.836083	0.539725	0.708555	0.14208	0.0713701	0.0734494
Lsat_1_v5_gn_2_101421	0.836032	0.334594	0.27668	0.29025	0.349348	0.0531676
Lsat_1_v5_gn_8_133760	0.83595	0.481604	0.748511	0.176121	0.0609467	0.110494
Lsat_1_v5_gn_1_78921	0.835905	0.19935	0.357297	0.446603	0.269426	0.0769617
Lactuca_sativa_newGene_5517	0.835854	0.580102	0.433759	0.12122	0.208382	0.0657513
Lsat_1_v5_gn_4_28800	0.835836	0.595659	0.587125	0.113885	0.117858	0.0500553
Lsat_1_v5_gn_9_125121	0.835817	0.60251	0.731316	0.110759	0.0650266	0.0647224
Lactuca_sativa_newGene_725	0.835771	0.461859	0.132968	0.188796	0.556435	0.17726
Lsat_1_v5_gn_2_20881	0.835695	0.468277	0.302936	0.184463	0.320841	0.0721673
Lsat_1_v5_gn_1_69401	0.835671	0.55718	0.688376	0.132501	0.0774206	0.0639431
Lsat_1_v5_gn_6_41981	0.835652	0.0909046	0.0604693	0.650091	0.750277	0.0596762
Lsat_1_v5_gn_3_15700	0.83555	0.271429	0.701825	0.354499	0.0731545	0.206959
Lsat_1_v5_gn_2_101461	0.835485	0.778114	0.597938	0.0550783	0.112592	0.0812461
Lsat_1_v5_gn_4_15480	0.835451	0.30301	0.198087	0.320415	0.447696	0.0630025
Lsat_1_v5_gn_1_118280	0.83545	0.154564	0.134915	0.516397	0.552174	0.0509299
Lsat_1_v5_gn_4_145920	0.835331	0.554299	0.515191	0.13371	0.155151	0.0511116
Lsat_1_v5_gn_6_4621	0.835231	0.606395	0.313869	0.10862	0.309143	0.117542
Lsat_1_v5_gn_6_43640	0.835209	0.582775	0.698329	0.119452	0.074074	0.061126
Lsat_1_v5_gn_4_6101	0.835187	0.426954	0.771109	0.212552	0.056208	0.152726
Lsat_1_v5_gn_0_16801	0.835145	0.0836464	0.158599	0.669175	0.508979	0.0699733
Lsat_1_v5_gn_9_63420	0.835105	0.668169	0.731488	0.0839801	0.0647428	0.0538227
Lsat_1_v5_gn_5_171060	0.835042	0.226844	0.693037	0.407664	0.075647	0.241468
Lsat_1_v5_gn_6_88380	0.835024	0.261069	0.665306	0.365562	0.0849529	0.187603
Lsat_1_v5_gn_1_79880	0.834968	0.189181	0.0846777	0.459999	0.665997	0.0826851
Lsat_1_v5_gn_5_10520	0.834931	0.647271	0.652818	0.0915687	0.0894684	0.0500257
Lsat_1_v5_gn_1_58740	0.834916	0.322359	0.705114	0.30037	0.0719062	0.170328
Lsat_1_v5_gn_8_59861	0.834821	0.568335	0.684515	0.126177	0.078282	0.0609555
Lsat_1_v5_gn_7_57100	0.834737	0.122566	0.0706205	0.575556	0.709269	0.0650378
Lsat_1_v5_gn_8_16701	0.834651	0.57478	0.734127	0.122878	0.0639349	0.072132
Lsat_1_v5_gn_1_43420	0.83458	0.436993	0.764266	0.204626	0.0573256	0.142098
Lsat_1_v5_gn_5_67180	0.834469	0.442649	0.734237	0.200514	0.0638485	0.120222
Lsat_1_v5_gn_8_2340	0.834425	0.576027	0.658695	0.1221	0.0870193	0.0554213
Lsat_1_v5_gn_2_131440	0.834418	0.342348	0.601076	0.280863	0.110426	0.101642
Lsat_1_v5_gn_8_152241	0.834346	0.616472	0.669216	0.103656	0.0832239	0.0522979
Lsat_1_v5_gn_3_51421	0.834295	0.0807435	0.24066	0.676363	0.388957	0.114695
Lsat_1_v5_gn_1_37160	0.834233	0.671306	0.743902	0.0824414	0.0614876	0.0551599
Lsat_1_v5_gn_7_20241	0.834197	0.529805	0.682447	0.145858	0.0786675	0.0685074
Lsat_1_v5_gn_7_4380	0.834112	0.118619	0.0639086	0.582807	0.733521	0.0698999
Lsat_1_v5_gn_8_8241	0.834099	0.207505	0.69319	0.432201	0.0751815	0.262709
Lsat_1_v5_gn_5_75620	0.834	0.0863531	0.114125	0.659904	0.59227	0.0536716
Lsat_1_v5_gn_5_98900	0.833936	0.537236	0.495593	0.141569	0.165434	0.0512533
Lsat_1_v5_gn_4_29860	0.83377	0.649336	0.700234	0.0901282	0.0728847	0.0522985
Lsat_1_v5_gn_2_67640	0.833734	0.0690977	0.291654	0.71326	0.329756	0.171115
Lactuca_sativa_newGene_6076	0.833729	0.388849	0.136616	0.240045	0.546188	0.130721
Lsat_1_v5_gn_9_37320	0.833706	0.0795693	0.0814108	0.679016	0.673546	0.0500266
Lsat_1_v5_gn_5_149681	0.833684	0.505962	0.778101	0.158997	0.0547356	0.116683
Lsat_1_v5_gn_6_50161	0.833672	0.178958	0.606164	0.473512	0.107661	0.222623
Lsat_1_v5_gn_8_42680	0.833641	0.587092	0.762186	0.116261	0.0574998	0.0783143
Lsat_1_v5_gn_3_26381	0.833574	0.649674	0.605133	0.0898916	0.108047	0.0515911
Lsat_1_v5_gn_8_92521	0.833521	0.0818999	0.0827293	0.671847	0.66944	0.0500051
Lsat_1_v5_gn_8_82341	0.833519	0.395534	0.106395	0.234456	0.60883	0.170761
Lsat_1_v5_gn_1_112881	0.833513	0.15936	0.122126	0.505072	0.574541	0.0535271
Lactuca_sativa_newGene_594	0.833495	0.547032	0.307131	0.135978	0.313432	0.0955158
Lsat_1_v5_gn_7_32861	0.833488	0.388097	0.652659	0.240354	0.0887302	0.103956
Lsat_1_v5_gn_4_184621	0.833348	0.237682	0.684295	0.391211	0.0776697	0.223156
Lsat_1_v5_gn_2_135921	0.833347	0.454888	0.785827	0.190883	0.0535339	0.147922
Lsat_1_v5_gn_8_32820	0.833337	0.207812	0.266565	0.430575	0.356702	0.0542627
Lsat_1_v5_gn_8_42261	0.83317	0.64559	0.66994	0.0912078	0.0823804	0.0505039
Lsat_1_v5_gn_8_48980	0.833142	0.304329	0.565743	0.31577	0.126149	0.104167
Lsat_1_v5_gn_8_102841	0.832844	0.564238	0.573664	0.126663	0.122043	0.0500659
Lsat_1_v5_gn_7_34041	0.832817	0.663353	0.547755	0.0845005	0.135038	0.0604903
Lsat_1_v5_gn_1_124981	0.832808	0.231178	0.538634	0.398609	0.139852	0.132753
Lsat_1_v5_gn_8_147740	0.832783	0.234497	0.547261	0.39435	0.135268	0.134966
Lsat_1_v5_gn_1_72761	0.832779	0.673406	0.68969	0.0810042	0.0756944	0.0502386
Lsat_1_v5_gn_7_4680	0.832778	0.395242	0.782514	0.233787	0.0539083	0.181879
Lsat_1_v5_gn_4_184360	0.832757	0.488602	0.666112	0.168554	0.0835007	0.0743443
Lsat_1_v5_gn_7_93120	0.832752	0.549513	0.375909	0.13407	0.249412	0.0725639
Lsat_1_v5_gn_1_56280	0.832723	0.144776	0.252715	0.529421	0.371914	0.0686119
Lsat_1_v5_gn_4_98620	0.832709	0.673301	0.676789	0.0810057	0.0798347	0.0500108
Lsat_1_v5_gn_9_34380	0.832703	0.375993	0.729663	0.249282	0.0644029	0.153033
Lsat_1_v5_gn_5_84581	0.832671	0.634898	0.433996	0.0950613	0.204617	0.0804424
Lsat_1_v5_gn_5_96401	0.832567	0.388013	0.561175	0.239288	0.127975	0.0723299
Lsat_1_v5_gn_6_74900	0.832537	0.30751	0.428134	0.311698	0.208668	0.0619948
Lsat_1_v5_gn_7_71780	0.832535	0.102982	0.382542	0.615294	0.243679	0.167536
Lsat_1_v5_gn_2_36961	0.832486	0.272589	0.313076	0.348646	0.306073	0.0516072
Lsat_1_v5_gn_9_31040	0.832431	0.0985409	0.401306	0.62585	0.228626	0.187099
Lsat_1_v5_gn_9_20601	0.832406	0.289791	0.714947	0.329809	0.0681346	0.202331
Lsat_1_v5_gn_5_2901	0.832358	0.118966	0.206286	0.579334	0.431167	0.0661528
Lsat_1_v5_gn_5_29640	0.832249	0.457646	0.758979	0.187867	0.0577839	0.127794
Lsat_1_v5_gn_1_52561	0.832245	0.666261	0.437776	0.0831895	0.20147	0.0902334
Lactuca_sativa_newGene_6026	0.832222	0.690015	0.21278	0.0753474	0.421991	0.25386
Lsat_1_v5_gn_2_48100	0.832205	0.48148	0.463528	0.172426	0.183929	0.0502334
Lsat_1_v5_gn_7_41980	0.832136	0.316106	0.406975	0.3026	0.223914	0.0568367
Lsat_1_v5_gn_2_241	0.832105	0.72502	0.688192	0.0653717	0.075866	0.0513148
Lsat_1_v5_gn_0_12340	0.832086	0.632291	0.625342	0.0957445	0.0985353	0.0500387
Lactuca_sativa_newGene_3478	0.832012	0.116124	0.141365	0.584853	0.534558	0.0518679
Lsat_1_v5_gn_6_4181	0.831899	0.362315	0.714938	0.259828	0.0679509	0.151306
Lsat_1_v5_gn_4_170061	0.83175	0.240211	0.668639	0.385622	0.082122	0.208182
Lactuca_sativa_newGene_2885	0.831749	0.418243	0.750874	0.214999	0.0592811	0.143175
Lsat_1_v5_gn_6_44241	0.831698	0.257422	0.452421	0.364821	0.190789	0.0831633
Lsat_1_v5_gn_8_57300	0.831675	0.594632	0.702401	0.111414	0.0713873	0.059815
Lsat_1_v5_gn_7_77321	0.831404	0.655069	0.416846	0.086724	0.215637	0.093491
Lsat_1_v5_gn_1_101761	0.83136	0.596768	0.731958	0.11024	0.0634094	0.0661541
Lsat_1_v5_gn_3_7240	0.831344	0.273223	0.611191	0.346264	0.103951	0.143821
Lsat_1_v5_gn_5_160741	0.83134	0.622136	0.150975	0.0993839	0.51612	0.272029
Lsat_1_v5_gn_9_15561	0.831208	0.677309	0.689142	0.0789532	0.0751761	0.0501265
Lsat_1_v5_gn_5_180820	0.831204	0.146643	0.50926	0.523632	0.154775	0.191512
Lsat_1_v5_gn_7_45260	0.831181	0.137323	0.374241	0.54082	0.248832	0.122551
Lsat_1_v5_gn_1_27540	0.83108	0.433943	0.633678	0.202888	0.0946043	0.0800679
Lsat_1_v5_gn_8_119901	0.831072	0.180742	0.61356	0.466627	0.102774	0.226274
Lsat_1_v5_gn_3_39581	0.831027	0.387416	0.711638	0.237884	0.0685284	0.134864
Lsat_1_v5_gn_1_16860	0.830931	0.623545	0.781949	0.0985577	0.053681	0.0750089
Lsat_1_v5_gn_7_69161	0.830855	0.31065	0.467881	0.306211	0.17971	0.069868
Lsat_1_v5_gn_8_64401	0.83081	0.603215	0.722689	0.10703	0.0655276	0.0625049
Lsat_1_v5_gn_4_185021	0.830605	0.584723	0.744191	0.115175	0.0603894	0.0727037
Lsat_1_v5_gn_2_108901	0.830597	0.512432	0.234969	0.152404	0.390418	0.117592
Lsat_1_v5_gn_7_106541	0.830581	0.232299	0.453011	0.393771	0.189212	0.0943926
Lsat_1_v5_gn_3_90761	0.83057	0.30335	0.236048	0.313143	0.389021	0.0548553
Lsat_1_v5_gn_5_169160	0.830444	0.647639	0.42487	0.0889273	0.208672	0.0877876
Lsat_1_v5_gn_2_83781	0.830413	0.578184	0.748732	0.118083	0.0593757	0.0760331
Lsat_1_v5_gn_2_121360	0.830389	0.587313	0.736179	0.113833	0.0621179	0.0695668
Lsat_1_v5_gn_7_49741	0.830385	0.423349	0.691714	0.209708	0.0740334	0.106788
Lsat_1_v5_gn_7_5161	0.83031	0.583771	0.587358	0.115404	0.113757	0.0500097
Lsat_1_v5_gn_4_1681	0.83027	0.675646	0.653138	0.0790612	0.0868234	0.050437
Lsat_1_v5_gn_0_14601	0.830223	0.401798	0.620055	0.225629	0.0995458	0.0859159
Lsat_1_v5_gn_8_154821	0.830115	0.071118	0.421062	0.701186	0.211068	0.266071
Lsat_1_v5_gn_4_162801	0.830097	0.603335	0.680401	0.106506	0.0774396	0.0549159
Lsat_1_v5_gn_7_102501	0.83001	0.312793	0.307819	0.302923	0.307861	0.0500229
Lsat_1_v5_gn_2_86980	0.829966	0.514768	0.525315	0.150512	0.144638	0.0500803
Lsat_1_v5_gn_5_72101	0.829933	0.384166	0.676698	0.239169	0.0785607	0.117131
Lsat_1_v5_gn_8_159861	0.829878	0.313285	0.745406	0.302258	0.0599312	0.209206
Lsat_1_v5_gn_8_23381	0.82982	0.348053	0.52672	0.269633	0.143744	0.0743668
Lsat_1_v5_gn_9_31960	0.829706	0.20775	0.615614	0.425004	0.101054	0.199171
Lsat_1_v5_gn_5_132821	0.829688	0.0656644	0.147538	0.720663	0.519633	0.0834662
Lsat_1_v5_gn_7_107421	0.829447	0.187625	0.691172	0.453608	0.0738025	0.284895
Lsat_1_v5_gn_2_55700	0.829435	0.336739	0.358769	0.279364	0.259742	0.0504093
Lsat_1_v5_gn_9_65700	0.829429	0.528731	0.722881	0.142316	0.0650165	0.0814366
Lsat_1_v5_gn_1_68460	0.829421	0.567438	0.256983	0.122474	0.361957	0.130705
Lsat_1_v5_gn_1_109500	0.829341	0.129795	0.572049	0.552505	0.120201	0.262223
Lsat_1_v5_gn_9_5220	0.829328	0.0882596	0.364376	0.647815	0.254803	0.1803
Lsat_1_v5_gn_8_163421	0.82922	0.116359	0.30446	0.580029	0.310141	0.107453
Lsat_1_v5_gn_3_29680	0.829207	0.125177	0.142257	0.56156	0.528491	0.0507985
Lsat_1_v5_gn_2_67600	0.829182	0.558338	0.413154	0.12675	0.215837	0.0655176
Lsat_1_v5_gn_9_111061	0.829177	0.152823	0.0558052	0.509462	0.766141	0.108183
Lsat_1_v5_gn_1_75561	0.829168	0.636806	0.766824	0.092294	0.0556881	0.0665688
Lsat_1_v5_gn_6_12720	0.829152	0.629161	0.652838	0.0952491	0.0863442	0.0504601
Lsat_1_v5_gn_8_78141	0.829147	0.0561756	0.0973646	0.763943	0.623826	0.0688535
Lsat_1_v5_gn_2_124621	0.829093	0.574779	0.782112	0.118726	0.053366	0.0908537
Lsat_1_v5_gn_9_2021	0.828902	0.743186	0.697463	0.0601403	0.0717139	0.0521242
Lsat_1_v5_gn_1_18740	0.828877	0.507253	0.216691	0.153819	0.41154	0.12679
Lsat_1_v5_gn_8_52100	0.828816	0.0794079	0.238785	0.672523	0.382963	0.115599
Lsat_1_v5_gn_4_82740	0.828751	0.0690048	0.0590229	0.706824	0.74836	0.0517979
Lsat_1_v5_gn_9_119461	0.82867	0.744304	0.545503	0.059841	0.132833	0.0843309
Lsat_1_v5_gn_5_41441	0.828667	0.581311	0.703839	0.115372	0.0698019	0.0625863
Lsat_1_v5_gn_4_37561	0.82855	0.211615	0.635292	0.417906	0.0925236	0.209881
Lsat_1_v5_gn_1_29701	0.828499	0.157904	0.598194	0.499618	0.107684	0.242393
Lactuca_sativa_newGene_6363	0.828416	0.318644	0.439584	0.295045	0.196054	0.0618151
Lactuca_sativa_newGene_363	0.828412	0.141728	0.179473	0.528224	0.464418	0.0529448
Lsat_1_v5_gn_4_21421	0.828353	0.138959	0.260826	0.533298	0.35593	0.0738601
Lsat_1_v5_gn_4_36140	0.828326	0.177568	0.556235	0.467248	0.127135	0.18834
Lsat_1_v5_gn_5_9321	0.828264	0.332245	0.42054	0.281968	0.209375	0.056276
Lsat_1_v5_gn_1_3200	0.828258	0.223084	0.0745858	0.402128	0.686941	0.113874
Lsat_1_v5_gn_5_10500	0.828252	0.524537	0.580368	0.143594	0.115514	0.0522912
Lsat_1_v5_gn_1_71221	0.828212	0.652876	0.759948	0.0858428	0.0566794	0.0613008
Lsat_1_v5_gn_4_86440	0.828184	0.476651	0.578581	0.171488	0.116292	0.0575953
Lsat_1_v5_gn_8_2141	0.82818	0.192306	0.428614	0.444687	0.203481	0.106663
Lsat_1_v5_gn_8_99360	0.828143	0.125763	0.173474	0.558722	0.473417	0.0552872
Lsat_1_v5_gn_3_29360	0.828083	0.136411	0.263605	0.537701	0.35235	0.0761215
Lsat_1_v5_gn_4_109081	0.828062	0.0832506	0.122036	0.660047	0.566242	0.0569502
Lsat_1_v5_gn_8_89001	0.828	0.0758348	0.0846822	0.682533	0.655849	0.0506214
Lsat_1_v5_gn_6_106180	0.827995	0.106299	0.371956	0.60062	0.246784	0.156085
Lsat_1_v5_gn_7_98920	0.827985	0.460238	0.584818	0.181752	0.11329	0.0613836
Lsat_1_v5_gn_2_11660	0.827976	0.641639	0.404053	0.08981	0.221292	0.0930174
Lsat_1_v5_gn_9_83921	0.827915	0.454454	0.664326	0.185477	0.0817151	0.0838752
Lsat_1_v5_gn_5_67880	0.827888	0.500968	0.688949	0.156557	0.0738207	0.077992
Lsat_1_v5_gn_9_58521	0.827861	0.612032	0.586583	0.101387	0.112404	0.0504971
Lsat_1_v5_gn_7_18141	0.827754	0.427992	0.244416	0.203457	0.374466	0.0805863
Lsat_1_v5_gn_3_36180	0.827734	0.447974	0.358495	0.189615	0.257828	0.056189
Lsat_1_v5_gn_3_122300	0.827708	0.426371	0.719931	0.204562	0.0651869	0.119915
Lsat_1_v5_gn_9_13960	0.827694	0.326245	0.706628	0.286825	0.0686668	0.168742
Lsat_1_v5_gn_9_50600	0.827596	0.338333	0.137872	0.275496	0.534167	0.104963
Lsat_1_v5_gn_7_8160	0.827556	0.130756	0.0673565	0.547833	0.711316	0.07216
Lsat_1_v5_gn_7_93220	0.827499	0.543409	0.334934	0.132973	0.278479	0.0835015
Lsat_1_v5_gn_5_188620	0.827388	0.163995	0.438445	0.48763	0.195743	0.131843
Lsat_1_v5_gn_6_34600	0.827374	0.266671	0.144923	0.347842	0.520738	0.0728356
Lsat_1_v5_gn_3_33580	0.827313	0.445351	0.758315	0.190946	0.0567753	0.133613
Lsat_1_v5_gn_5_24781	0.827132	0.103797	0.0792803	0.60518	0.670525	0.0534997
Lsat_1_v5_gn_4_184300	0.827021	0.578241	0.505923	0.115626	0.152918	0.0538283
Lsat_1_v5_gn_5_149600	0.826988	0.751291	0.473346	0.0580082	0.172389	0.115706
Lsat_1_v5_gn_7_10920	0.826881	0.271645	0.5762	0.341563	0.11647	0.126191
Lsat_1_v5_gn_8_85820	0.826829	0.29821	0.73798	0.313182	0.0606937	0.214981
Lsat_1_v5_gn_8_54121	0.826819	0.759003	0.393369	0.0565454	0.228165	0.163745
Lsat_1_v5_gn_7_14141	0.82681	0.636182	0.47354	0.0912131	0.172094	0.0699302
Lsat_1_v5_gn_7_19480	0.82675	0.280604	0.624847	0.33157	0.0955438	0.146811
Lactuca_sativa_newGene_2062	0.826702	0.498508	0.494501	0.156913	0.159262	0.0500116
Lsat_1_v5_gn_3_99700	0.826598	0.159117	0.0820873	0.494585	0.661347	0.0714191
Lsat_1_v5_gn_3_35460	0.826588	0.441252	0.549191	0.192972	0.129313	0.0584896
Lsat_1_v5_gn_4_161660	0.826568	0.125681	0.301483	0.556456	0.309495	0.0980996
Lsat_1_v5_gn_2_45361	0.826449	0.558128	0.771524	0.12477	0.0544281	0.0918273
Lsat_1_v5_gn_7_44361	0.826443	0.40661	0.441414	0.217611	0.192709	0.0509075
Lsat_1_v5_gn_5_121061	0.826404	0.360108	0.542173	0.254784	0.132736	0.0750624
Lsat_1_v5_gn_7_65120	0.826358	0.434431	0.767394	0.197427	0.055047	0.145732
Lsat_1_v5_gn_4_95281	0.826338	0.522069	0.535572	0.143315	0.136106	0.050132
Lsat_1_v5_gn_1_45940	0.826275	0.457656	0.17892	0.181707	0.461956	0.129516
Lsat_1_v5_gn_4_122120	0.826138	0.656465	0.721048	0.0835341	0.0643985	0.0538507
Lsat_1_v5_gn_2_66260	0.82612	0.266463	0.650359	0.346273	0.0856621	0.172882
Lsat_1_v5_gn_8_164240	0.826082	0.186942	0.702597	0.449415	0.0691756	0.29694
Lsat_1_v5_gn_7_5261	0.826067	0.353072	0.618943	0.260425	0.0974827	0.104465
Lsat_1_v5_gn_5_71940	0.826041	0.711185	0.558753	0.06686	0.124158	0.0693827
Lsat_1_v5_gn_5_67680	0.826019	0.415361	0.441607	0.210654	0.192134	0.0505135
Lsat_1_v5_gn_5_51720	0.825944	0.166437	0.0689848	0.481358	0.703107	0.0893731
Lsat_1_v5_gn_1_43380	0.825936	0.536673	0.191576	0.135206	0.442301	0.162404
Lactuca_sativa_newGene_5088	0.8259	0.364967	0.604366	0.250047	0.103359	0.0936441
Lactuca_sativa_newGene_3015	0.825873	0.364758	0.710668	0.250189	0.0669363	0.147044
Lsat_1_v5_gn_4_139401	0.825847	0.797927	0.520853	0.0512314	0.143562	0.122465
Lsat_1_v5_gn_4_131761	0.825815	0.509531	0.683851	0.149806	0.0744943	0.0740015
Lsat_1_v5_gn_1_66000	0.825792	0.166551	0.532955	0.480936	0.137036	0.184544
Lsat_1_v5_gn_3_55860	0.825777	0.70069	0.664825	0.0695883	0.0805269	0.051163
Lsat_1_v5_gn_4_183140	0.825763	0.553239	0.352585	0.126657	0.260467	0.0806139
Lsat_1_v5_gn_2_106641	0.825733	0.290646	0.732681	0.319486	0.0615528	0.216673
Lsat_1_v5_gn_5_32880	0.825526	0.579298	0.604725	0.114096	0.102974	0.0504918
Lactuca_sativa_newGene_6269	0.825389	0.73399	0.636344	0.061165	0.0903735	0.0587867
Lsat_1_v5_gn_5_164920	0.825217	0.121775	0.10712	0.562414	0.594528	0.0507731
Lsat_1_v5_gn_2_18260	0.825133	0.148948	0.445303	0.510005	0.188717	0.149391
Lsat_1_v5_gn_8_60161	0.824946	0.67077	0.706969	0.0782022	0.0675845	0.0512048
Lsat_1_v5_gn_9_77980	0.824941	0.234043	0.211325	0.383111	0.412814	0.0506815
Lsat_1_v5_gn_7_87081	0.82492	0.577858	0.296514	0.114333	0.312297	0.113256
Lactuca_sativa_newGene_3560	0.824859	0.541033	0.732563	0.132099	0.0613307	0.0812153
Lsat_1_v5_gn_1_69381	0.824572	0.59548	0.669562	0.106291	0.0784219	0.0544604
Lsat_1_v5_gn_3_48441	0.824552	0.64241	0.336349	0.0876985	0.273371	0.123599
Lsat_1_v5_gn_4_76441	0.824531	0.433862	0.478401	0.195887	0.166908	0.0514502
Lactuca_sativa_newGene_3862	0.824247	0.799402	0.531812	0.050974	0.136384	0.118293
Lsat_1_v5_gn_2_58201	0.824239	0.543083	0.56136	0.130572	0.121565	0.0502448
Lsat_1_v5_gn_4_40001	0.824165	0.481354	0.763498	0.164769	0.0552507	0.11917
Lsat_1_v5_gn_4_89161	0.823995	0.114273	0.19797	0.576587	0.430049	0.0657912
Lsat_1_v5_gn_9_99500	0.823994	0.622093	0.619424	0.0950303	0.0960764	0.0500056
Lsat_1_v5_gn_8_42040	0.82397	0.403805	0.775223	0.216927	0.0534933	0.170068
Lsat_1_v5_gn_4_28860	0.823966	0.446971	0.565268	0.186408	0.119508	0.0602197
Lsat_1_v5_gn_4_153101	0.823951	0.440963	0.743618	0.190425	0.0587708	0.12656
Lsat_1_v5_gn_5_78801	0.823922	0.626251	0.761804	0.0933813	0.0554769	0.0676177
Lactuca_sativa_newGene_1033	0.823902	0.26155	0.356901	0.348677	0.254431	0.058575
Lactuca_sativa_newGene_783	0.823892	0.646988	0.779591	0.0857208	0.0529189	0.0679318
Lsat_1_v5_gn_5_139480	0.823793	0.627257	0.346584	0.092924	0.263251	0.111124
Lsat_1_v5_gn_5_82100	0.823779	0.750277	0.401442	0.0574527	0.218489	0.152365
Lsat_1_v5_gn_0_19660	0.823735	0.771484	0.585829	0.0539704	0.109949	0.0823703
Lsat_1_v5_gn_5_137740	0.823672	0.110663	0.0883576	0.584122	0.639322	0.0523859
Lsat_1_v5_gn_9_97261	0.823671	0.670999	0.746008	0.0775593	0.0582351	0.0555282
Lsat_1_v5_gn_6_104541	0.823665	0.490319	0.757758	0.158957	0.0560987	0.111786
Lsat_1_v5_gn_4_121261	0.823622	0.0775354	0.111103	0.671006	0.583057	0.0562421
Lsat_1_v5_gn_3_90620	0.823608	0.392665	0.523456	0.224998	0.14029	0.0626791
Lsat_1_v5_gn_9_36320	0.823514	0.611185	0.552544	0.0990816	0.125302	0.0525934
Lsat_1_v5_gn_1_97241	0.82346	0.3239	0.10989	0.283472	0.585548	0.123955
Lsat_1_v5_gn_2_125000	0.823444	0.495419	0.0919016	0.155777	0.629438	0.271454
Lsat_1_v5_gn_4_2241	0.823425	0.332215	0.0799302	0.275704	0.66331	0.174677
Lsat_1_v5_gn_5_171281	0.823366	0.144767	0.0735471	0.514821	0.683629	0.0725401
Lsat_1_v5_gn_3_19561	0.823337	0.425875	0.696238	0.200196	0.0699101	0.107871
Lsat_1_v5_gn_8_80041	0.82333	0.368162	0.128739	0.244264	0.54533	0.127579
Lsat_1_v5_gn_2_52580	0.823272	0.0930206	0.107877	0.626242	0.58986	0.0510289
Lsat_1_v5_gn_9_15721	0.823025	0.493072	0.77944	0.156768	0.0528159	0.123563
Lsat_1_v5_gn_1_78000	0.823002	0.642803	0.751472	0.0867537	0.0570602	0.0613103
Lsat_1_v5_gn_8_62240	0.822996	0.640505	0.561469	0.087576	0.12061	0.0548349
Lsat_1_v5_gn_9_115760	0.822983	0.204549	0.725939	0.419212	0.0622783	0.29827
Lsat_1_v5_gn_8_143020	0.822952	0.786326	0.469136	0.0520269	0.17113	0.140476
Lsat_1_v5_gn_5_145481	0.822927	0.53098	0.317533	0.135761	0.288817	0.0857136
Lsat_1_v5_gn_8_2981	0.822849	0.13907	0.0518196	0.524578	0.788235	0.114483
Lactuca_sativa_newGene_1427	0.822808	0.728715	0.437034	0.0616038	0.191914	0.119755
Lsat_1_v5_gn_8_110081	0.822746	0.419728	0.752443	0.203925	0.0568301	0.143425
Lsat_1_v5_gn_2_78320	0.822696	0.440847	0.720183	0.189215	0.0635285	0.113353
Lsat_1_v5_gn_8_122660	0.822597	0.055953	0.143654	0.757334	0.515677	0.100971
Lsat_1_v5_gn_6_261	0.822553	0.591534	0.771573	0.106688	0.0537657	0.0806024
Lsat_1_v5_gn_4_169820	0.822445	0.162391	0.131407	0.482664	0.538692	0.0522698
Lsat_1_v5_gn_9_99860	0.822377	0.0884401	0.0528588	0.637227	0.778347	0.0700101
Lsat_1_v5_gn_4_72040	0.82234	0.524675	0.504052	0.138605	0.149876	0.0503069
Lsat_1_v5_gn_2_54340	0.822259	0.52625	0.693477	0.137706	0.0702738	0.0724537
Lsat_1_v5_gn_7_32261	0.822152	0.0961095	0.14663	0.616634	0.509577	0.0585625
Lsat_1_v5_gn_5_135261	0.822093	0.419709	0.75533	0.203239	0.0561893	0.145433
Lsat_1_v5_gn_4_4161	0.822011	0.0696932	0.214137	0.695236	0.404622	0.116955
Lsat_1_v5_gn_9_84601	0.821959	0.275025	0.138041	0.330913	0.525157	0.0792271
Lactuca_sativa_newGene_6547	0.821947	0.460434	0.702671	0.175643	0.067665	0.096805
Lsat_1_v5_gn_8_126320	0.8219	0.238472	0.590837	0.373154	0.106569	0.156446
Lsat_1_v5_gn_2_5940	0.821885	0.705782	0.500808	0.0668316	0.151315	0.0839143
Lsat_1_v5_gn_5_91020	0.821757	0.620909	0.597459	0.0942194	0.103666	0.0504278
Lsat_1_v5_gn_6_116360	0.821505	0.658893	0.567055	0.0804949	0.116928	0.0566574
Lsat_1_v5_gn_1_69961	0.821499	0.113054	0.462664	0.575514	0.173798	0.205782
Lsat_1_v5_gn_5_30240	0.821481	0.066669	0.0698278	0.70588	0.694036	0.0501329
Lsat_1_v5_gn_3_139941	0.821431	0.596748	0.534899	0.103761	0.132555	0.0528423
Lsat_1_v5_gn_2_113261	0.821414	0.487965	0.588484	0.158312	0.10727	0.0574172
Lsat_1_v5_gn_1_127701	0.821402	0.526631	0.526777	0.136817	0.136741	0.05
Lsat_1_v5_gn_8_33021	0.821373	0.194955	0.0859588	0.430433	0.642707	0.0841706
Lsat_1_v5_gn_4_1480	0.821344	0.347976	0.546795	0.258991	0.126507	0.0801528
Lsat_1_v5_gn_6_87200	0.821314	0.0758401	0.521461	0.673226	0.13948	0.338267
Lsat_1_v5_gn_3_55680	0.821274	0.255071	0.722152	0.352401	0.0626424	0.239401
Lactuca_sativa_newGene_924	0.821269	0.323044	0.757544	0.281444	0.055654	0.212304
Lactuca_sativa_newGene_6036	0.821189	0.537295	0.67827	0.131145	0.074255	0.0657654
Lsat_1_v5_gn_5_152080	0.821187	0.516273	0.629198	0.14216	0.0907629	0.0596214
Lsat_1_v5_gn_2_44781	0.821097	0.478622	0.745938	0.163582	0.0576475	0.110397
Lactuca_sativa_newGene_6562	0.82109	0.550632	0.739849	0.124436	0.0588131	0.0809792
Lsat_1_v5_gn_8_78100	0.821009	0.0544307	0.0905897	0.765102	0.629407	0.0678327
Lsat_1_v5_gn_9_86901	0.820915	0.70728	0.685995	0.0661214	0.071878	0.0504254
Lsat_1_v5_gn_5_97440	0.820897	0.253971	0.177693	0.353147	0.455633	0.0581291
Lsat_1_v5_gn_9_81040	0.820782	0.232019	0.191184	0.379561	0.435049	0.0523549
Lsat_1_v5_gn_2_104921	0.820697	0.655935	0.52568	0.0810975	0.136753	0.0631123
Lsat_1_v5_gn_6_80720	0.820642	0.253793	0.507993	0.352994	0.146231	0.105131
Lsat_1_v5_gn_7_66720	0.820616	0.0682065	0.115137	0.698858	0.569604	0.0638073
Lsat_1_v5_gn_4_131680	0.820612	0.391975	0.737492	0.22213	0.0591635	0.148953
Lsat_1_v5_gn_4_174621	0.820493	0.289936	0.400301	0.313064	0.215686	0.0604985
Lactuca_sativa_newGene_595	0.820436	0.473134	0.703781	0.166299	0.0668543	0.0925617
Lsat_1_v5_gn_1_55500	0.82042	0.603308	0.67087	0.100428	0.076186	0.0537371
Lsat_1_v5_gn_3_121180	0.820355	0.526269	0.749793	0.136173	0.0567851	0.0933114
Lsat_1_v5_gn_7_99581	0.820245	0.328313	0.697697	0.27524	0.0683846	0.161138
Lsat_1_v5_gn_0_16580	0.820202	0.203169	0.596974	0.416984	0.102906	0.190471
Lsat_1_v5_gn_8_154661	0.820107	0.368153	0.700826	0.240443	0.0675088	0.138912
Lsat_1_v5_gn_1_5301	0.820084	0.175955	0.307832	0.457119	0.294489	0.0717928
Lsat_1_v5_gn_5_120581	0.820072	0.176942	0.136193	0.455556	0.525801	0.053574
Lsat_1_v5_gn_5_6101	0.820005	0.0866609	0.486875	0.638772	0.157693	0.276943
Lactuca_sativa_newGene_2759	0.819998	0.764854	0.478331	0.0542938	0.162752	0.121414
Lsat_1_v5_gn_4_21741	0.819974	0.579353	0.22564	0.110322	0.386498	0.159487
Lsat_1_v5_gn_9_2360	0.819941	0.648034	0.393815	0.0834003	0.219972	0.0995885
Lsat_1_v5_gn_4_154821	0.819919	0.593526	0.722227	0.104175	0.0622306	0.0643834
Lsat_1_v5_gn_9_121101	0.81991	0.698086	0.765632	0.0681625	0.054167	0.0548584
Lsat_1_v5_gn_6_102161	0.819853	0.416168	0.639031	0.203382	0.0864919	0.0876788
Lsat_1_v5_gn_1_75540	0.819806	0.718082	0.62439	0.0631465	0.0918149	0.057788
Lsat_1_v5_gn_4_180241	0.819781	0.597852	0.783125	0.102283	0.0519905	0.0833868
Lsat_1_v5_gn_4_120561	0.819665	0.0726249	0.085448	0.681713	0.641725	0.0513728
Lsat_1_v5_gn_9_4461	0.819645	0.299741	0.699619	0.301932	0.0676647	0.182579
Lsat_1_v5_gn_9_54860	0.819641	0.694643	0.227572	0.0689888	0.383539	0.24213
Lsat_1_v5_gn_4_65500	0.819514	0.420852	0.700578	0.199699	0.0673688	0.112228
Lactuca_sativa_newGene_5106	0.819498	0.281746	0.678161	0.320308	0.0735992	0.180517
Lsat_1_v5_gn_8_121240	0.819471	0.45765	0.52829	0.175029	0.134425	0.0536136
Lsat_1_v5_gn_6_49181	0.819125	0.256826	0.132494	0.347345	0.531522	0.0758981
Lsat_1_v5_gn_1_1361	0.819095	0.304725	0.296499	0.29625	0.304472	0.0500645
Lsat_1_v5_gn_8_81380	0.818947	0.804864	0.533345	0.0503126	0.131427	0.121233
Lsat_1_v5_gn_6_37461	0.818894	0.332306	0.635483	0.269891	0.0872678	0.122196
Lsat_1_v5_gn_4_36541	0.81886	0.619789	0.694454	0.0930375	0.0687598	0.0547622
Lsat_1_v5_gn_4_131340	0.818845	0.315128	0.614271	0.285824	0.0951484	0.120689
Lsat_1_v5_gn_0_9380	0.818743	0.422455	0.699378	0.19777	0.0674158	0.11091
Lsat_1_v5_gn_6_66261	0.81873	0.494302	0.618319	0.152285	0.0935258	0.0614748
Lsat_1_v5_gn_9_53401	0.818692	0.473518	0.276487	0.164462	0.324839	0.0825075
Lsat_1_v5_gn_2_132660	0.818675	0.278567	0.70906	0.322581	0.064949	0.20681
Lsat_1_v5_gn_3_107180	0.818652	0.61804	0.676699	0.0935895	0.0736906	0.0528706
Lsat_1_v5_gn_4_3481	0.818648	0.32837	0.769805	0.273175	0.0533967	0.219521
Lsat_1_v5_gn_3_117761	0.818631	0.704637	0.58766	0.0660321	0.105853	0.0615368
Lsat_1_v5_gn_1_68261	0.818622	0.180759	0.5189	0.447465	0.13867	0.161571
Lactuca_sativa_newGene_802	0.818563	0.511444	0.588138	0.142618	0.105607	0.054328
Lactuca_sativa_newGene_7617	0.81853	0.14541	0.20921	0.506278	0.406157	0.0573863
Lsat_1_v5_gn_2_68820	0.818463	0.564145	0.751827	0.116164	0.0560436	0.0813626
Lsat_1_v5_gn_0_11001	0.818454	0.714978	0.741288	0.0634649	0.0579106	0.0507214
Lsat_1_v5_gn_4_23880	0.818255	0.73134	0.72856	0.059815	0.060392	0.0500081
Lsat_1_v5_gn_5_60580	0.818226	0.647406	0.427745	0.0827914	0.193567	0.0867178
Lsat_1_v5_gn_8_94641	0.818224	0.489457	0.772018	0.154625	0.0530533	0.120583
Lactuca_sativa_newGene_4733	0.81821	0.330029	0.673168	0.271109	0.0745622	0.144327
Lsat_1_v5_gn_6_111720	0.818159	0.712885	0.730844	0.0638681	0.0598922	0.0503284
Lsat_1_v5_gn_4_89180	0.818037	0.115253	0.469286	0.565497	0.166435	0.207002
Lsat_1_v5_gn_4_137721	0.817982	0.763864	0.561888	0.0540984	0.116875	0.0870417
Lsat_1_v5_gn_5_118640	0.817934	0.547785	0.783167	0.123512	0.05178	0.101669
Lsat_1_v5_gn_8_81220	0.817849	0.339952	0.787545	0.261749	0.0513688	0.227742
Lsat_1_v5_gn_2_134840	0.81782	0.542677	0.68781	0.125918	0.0701914	0.0669256
Lsat_1_v5_gn_3_90900	0.817787	0.302255	0.512068	0.296986	0.141648	0.0851877
Lsat_1_v5_gn_6_80140	0.817732	0.250134	0.664508	0.353179	0.0770097	0.196203
Lsat_1_v5_gn_6_65760	0.817724	0.793162	0.364617	0.0509137	0.240555	0.213933
Lsat_1_v5_gn_2_34600	0.817652	0.478582	0.78808	0.160485	0.0513046	0.136739
Lsat_1_v5_gn_3_35861	0.817647	0.250607	0.50284	0.352503	0.146572	0.104659
Lsat_1_v5_gn_5_130160	0.817579	0.675978	0.643765	0.0734729	0.0837203	0.0508865
Lsat_1_v5_gn_4_29421	0.817504	0.594863	0.766575	0.102137	0.053649	0.0776499
Lsat_1_v5_gn_7_16080	0.817451	0.664878	0.757708	0.0767743	0.0549109	0.0585902
Lsat_1_v5_gn_5_131541	0.817433	0.485612	0.764614	0.156161	0.0539045	0.117867
Lsat_1_v5_gn_5_29201	0.817252	0.345103	0.786382	0.256505	0.0514129	0.222385
Lsat_1_v5_gn_4_151760	0.817243	0.152926	0.0593184	0.490938	0.732531	0.0985951
Lsat_1_v5_gn_9_87441	0.817223	0.307204	0.74529	0.291387	0.0569096	0.214043
Lsat_1_v5_gn_7_50661	0.817221	0.467935	0.13795	0.166511	0.51815	0.175045
Lsat_1_v5_gn_2_89321	0.817214	0.0943024	0.535465	0.614101	0.129043	0.299835
Lactuca_sativa_newGene_6418	0.817159	0.473306	0.639445	0.163196	0.0850043	0.0708432
Lsat_1_v5_gn_5_74000	0.817159	0.213825	0.570477	0.397909	0.112409	0.163707
Lsat_1_v5_gn_8_91060	0.817096	0.149983	0.267187	0.495899	0.332829	0.0706776
Lsat_1_v5_gn_9_50321	0.81709	0.732597	0.686214	0.0592671	0.0703627	0.0521072
Lsat_1_v5_gn_7_50080	0.816917	0.268734	0.654756	0.330875	0.079751	0.174123
Lsat_1_v5_gn_4_180981	0.816765	0.372008	0.359811	0.23344	0.243411	0.0501209
Lactuca_sativa_newGene_4283	0.816736	0.590757	0.752998	0.103374	0.0555145	0.0739812
Lsat_1_v5_gn_1_106881	0.816708	0.368542	0.741624	0.236172	0.0574545	0.166287
Lsat_1_v5_gn_9_33260	0.816695	0.313069	0.577135	0.285043	0.109162	0.10484
Lsat_1_v5_gn_5_154881	0.816541	0.663071	0.567037	0.0769466	0.113544	0.0573095
Lsat_1_v5_gn_3_75120	0.816524	0.753446	0.708294	0.055403	0.0644591	0.0521518
Lsat_1_v5_gn_5_121160	0.816488	0.585499	0.743984	0.105431	0.056983	0.0724309
Lsat_1_v5_gn_5_108701	0.816469	0.142218	0.402594	0.509028	0.209614	0.132604
Lsat_1_v5_gn_2_35900	0.81632	0.574867	0.51749	0.109913	0.137584	0.0524108
Lsat_1_v5_gn_9_87901	0.816273	0.0744187	0.0586807	0.671007	0.734566	0.0538871
Lsat_1_v5_gn_6_32200	0.816186	0.181245	0.579822	0.443087	0.10767	0.200693
Lsat_1_v5_gn_4_167520	0.816167	0.0734972	0.213778	0.673979	0.396535	0.110062
Lsat_1_v5_gn_1_23561	0.816143	0.21256	0.55731	0.398134	0.117729	0.156849
Lsat_1_v5_gn_1_30101	0.81601	0.56498	0.638731	0.114119	0.0846909	0.0542111
Lsat_1_v5_gn_5_99841	0.815777	0.545483	0.565669	0.123068	0.113651	0.0502993
Lsat_1_v5_gn_1_51660	0.815669	0.221002	0.509044	0.386278	0.141562	0.124788
Lsat_1_v5_gn_3_30661	0.815637	0.215241	0.272592	0.393815	0.324919	0.0539295
Lsat_1_v5_gn_3_45220	0.81556	0.612985	0.778322	0.0938179	0.0519994	0.076725
Lsat_1_v5_gn_7_107500	0.815503	0.543914	0.634991	0.123629	0.0857425	0.0563416
Lsat_1_v5_gn_3_65081	0.815468	0.376282	0.0925758	0.228566	0.616127	0.180495
Lactuca_sativa_newGene_3802	0.815434	0.752273	0.481352	0.0553839	0.156896	0.112672
Lsat_1_v5_gn_4_123600	0.815292	0.72747	0.691519	0.0598504	0.0682818	0.0512645
Lsat_1_v5_gn_2_79961	0.815286	0.555302	0.775046	0.118072	0.0523124	0.09456
Lsat_1_v5_gn_8_68960	0.815272	0.680773	0.7162	0.071201	0.0622548	0.0511864
Lsat_1_v5_gn_6_26200	0.81524	0.195125	0.710523	0.421088	0.0635411	0.294331
Lsat_1_v5_gn_9_11520	0.815198	0.204754	0.622561	0.407421	0.09004	0.207214
Lsat_1_v5_gn_6_87300	0.815016	0.194305	0.513686	0.421943	0.138563	0.146803
Lsat_1_v5_gn_5_146820	0.815008	0.592776	0.773515	0.101498	0.0524465	0.0809963
Lsat_1_v5_gn_9_111721	0.814948	0.177031	0.705799	0.447756	0.0645696	0.313548
Lsat_1_v5_gn_4_165741	0.814932	0.355645	0.765776	0.244748	0.0533649	0.194829
Lsat_1_v5_gn_2_90600	0.814846	0.44053	0.197656	0.181621	0.416883	0.108442
Lsat_1_v5_gn_8_115640	0.814823	0.652646	0.564909	0.0794948	0.113359	0.0560332
Lsat_1_v5_gn_1_113361	0.814756	0.305773	0.687341	0.28962	0.0692065	0.169361
Lsat_1_v5_gn_8_131861	0.814704	0.447596	0.774197	0.176902	0.0523336	0.143343
Lactuca_sativa_newGene_2690	0.814625	0.561866	0.776524	0.114603	0.0520769	0.0928533
Lsat_1_v5_gn_6_80780	0.814603	0.597216	0.785446	0.0994567	0.0512464	0.084612
Lsat_1_v5_gn_3_47760	0.814542	0.396297	0.702531	0.212207	0.0652338	0.124944
Lsat_1_v5_gn_9_48021	0.814525	0.144826	0.0684356	0.501326	0.689924	0.0782083
Lsat_1_v5_gn_6_19780	0.814522	0.239642	0.264868	0.361218	0.331904	0.050727
Lsat_1_v5_gn_8_148521	0.814474	0.424651	0.778519	0.191895	0.0518587	0.159812
Lsat_1_v5_gn_4_133401	0.814462	0.624576	0.734047	0.0889243	0.0583527	0.0609082
Lsat_1_v5_gn_4_185081	0.814416	0.607382	0.792473	0.0953391	0.0507198	0.0843485
Lsat_1_v5_gn_3_80721	0.814406	0.574806	0.128022	0.10871	0.533321	0.267415
Lactuca_sativa_newGene_6171	0.814398	0.248502	0.692873	0.350455	0.0676194	0.220041
Lsat_1_v5_gn_2_75201	0.814397	0.636514	0.791007	0.0846734	0.0508144	0.0746579
Lsat_1_v5_gn_8_2381	0.814394	0.485958	0.769566	0.153334	0.0528208	0.120712
Lsat_1_v5_gn_8_70441	0.814365	0.773366	0.607598	0.0523827	0.0952273	0.0764415
Lsat_1_v5_gn_1_29320	0.814364	0.715706	0.534117	0.062108	0.127596	0.077306
Lsat_1_v5_gn_2_59281	0.814316	0.113496	0.0565754	0.563859	0.743702	0.0784041
Lsat_1_v5_gn_6_111521	0.814288	0.465207	0.675504	0.165505	0.0723205	0.0843567
Lsat_1_v5_gn_6_92860	0.814219	0.48485	0.492513	0.15382	0.149465	0.0500423
Lsat_1_v5_gn_3_4041	0.814217	0.414903	0.779117	0.198404	0.0517727	0.166266
Lsat_1_v5_gn_6_11080	0.814191	0.372346	0.596387	0.230253	0.0995502	0.0879793
Lactuca_sativa_newGene_5753	0.814177	0.400211	0.655587	0.208925	0.0782728	0.100186
Lsat_1_v5_gn_8_17420	0.814083	0.600647	0.798473	0.0977876	0.0503705	0.0895068
Lsat_1_v5_gn_6_87820	0.814065	0.73333	0.6199	0.0583965	0.090425	0.0616423
Lsat_1_v5_gn_3_102381	0.814023	0.583038	0.752678	0.104948	0.0550614	0.0760345
Lsat_1_v5_gn_1_8881	0.813973	0.322303	0.461953	0.272947	0.167209	0.065512
Lsat_1_v5_gn_4_22580	0.81396	0.462733	0.817892	0.166719	0.050025	0.17034
Lsat_1_v5_gn_8_2041	0.813882	0.564086	0.730958	0.113107	0.0588087	0.0739737
Lsat_1_v5_gn_6_53100	0.81385	0.425926	0.648493	0.190401	0.0804038	0.0877341
Lsat_1_v5_gn_3_131120	0.813842	0.267703	0.0997475	0.327849	0.595393	0.105737
Lsat_1_v5_gn_2_22481	0.813737	0.193433	0.215934	0.421336	0.390166	0.0507428
Lsat_1_v5_gn_7_86800	0.813704	0.144839	0.0544719	0.50008	0.756258	0.106777
Lsat_1_v5_gn_4_73540	0.813621	0.24909	0.769473	0.348694	0.0527286	0.293719
Lsat_1_v5_gn_5_19200	0.813575	0.553937	0.78945	0.117531	0.0508602	0.102634
Lsat_1_v5_gn_6_21441	0.813561	0.0985086	0.365929	0.598079	0.234696	0.163771
Lsat_1_v5_gn_5_180640	0.813559	0.650687	0.780289	0.0795637	0.0515944	0.0672379
Lsat_1_v5_gn_2_120781	0.81354	0.446773	0.566045	0.176328	0.112006	0.0603915
Lsat_1_v5_gn_1_63140	0.813431	0.461794	0.688939	0.166814	0.0683153	0.0905827
Lsat_1_v5_gn_5_24121	0.813421	0.540288	0.730494	0.123889	0.0587888	0.0806791
Lsat_1_v5_gn_9_88361	0.813378	0.242984	0.690665	0.355596	0.0678451	0.223392
Lactuca_sativa_newGene_5208	0.813313	0.564048	0.722236	0.112749	0.0604199	0.0712674
Lsat_1_v5_gn_1_85921	0.813311	0.543293	0.639867	0.122363	0.0830132	0.0571564
Lsat_1_v5_gn_9_13500	0.813276	0.66615	0.634633	0.0746532	0.0847801	0.0508313
Lsat_1_v5_gn_2_28400	0.813163	0.64898	0.760467	0.079938	0.0537952	0.062205
Lsat_1_v5_gn_4_91421	0.81314	0.290528	0.173726	0.302741	0.45027	0.0678117
Lsat_1_v5_gn_7_24341	0.813091	0.495446	0.78964	0.146891	0.050812	0.12921
Lsat_1_v5_gn_8_96880	0.813083	0.564282	0.141305	0.112494	0.505669	0.238462
Lsat_1_v5_gn_8_88561	0.813075	0.446953	0.77212	0.175775	0.0523603	0.142205
Lsat_1_v5_gn_2_72821	0.812993	0.35914	0.632228	0.239599	0.085475	0.107578
Lactuca_sativa_newGene_6301	0.812967	0.405874	0.711805	0.203541	0.0625835	0.125363
Lsat_1_v5_gn_8_68041	0.812958	0.586374	0.773268	0.102908	0.0522226	0.0829354
Lsat_1_v5_gn_5_130420	0.812955	0.473964	0.508916	0.159069	0.139466	0.0508816
Lsat_1_v5_gn_4_92200	0.812945	0.195514	0.524157	0.417183	0.131536	0.151687
Lsat_1_v5_gn_8_85341	0.812944	0.125926	0.0842902	0.5354	0.635596	0.0576544
Lsat_1_v5_gn_1_71460	0.812919	0.596056	0.794399	0.0989467	0.0505133	0.0891579
Lsat_1_v5_gn_4_166540	0.812862	0.0608436	0.350828	0.719651	0.246391	0.245613
Lsat_1_v5_gn_3_7001	0.812843	0.632185	0.236518	0.0854172	0.362686	0.184652
Lsat_1_v5_gn_2_82201	0.812801	0.653604	0.425767	0.0783023	0.189468	0.0896814
Lsat_1_v5_gn_2_95660	0.81272	0.600534	0.76524	0.097059	0.0531135	0.0755081
Lsat_1_v5_gn_5_146120	0.812717	0.0593666	0.0855755	0.726679	0.631552	0.0581967
Lsat_1_v5_gn_6_86141	0.812662	0.0882754	0.416431	0.62383	0.195752	0.217516
Lsat_1_v5_gn_2_124880	0.812589	0.15434	0.562212	0.481528	0.113097	0.219297
Lsat_1_v5_gn_5_117161	0.812577	0.072308	0.0906056	0.67325	0.617297	0.0525998
Lsat_1_v5_gn_8_160460	0.812551	0.245133	0.143204	0.351891	0.501365	0.0670636
Lsat_1_v5_gn_7_47441	0.812549	0.272601	0.174171	0.320782	0.448699	0.0631205
Lsat_1_v5_gn_7_42880	0.812543	0.785625	0.548513	0.0510558	0.119352	0.102719
Lsat_1_v5_gn_8_65360	0.812447	0.70229	0.767699	0.0646378	0.0527803	0.0546084
Lsat_1_v5_gn_6_79160	0.812439	0.584757	0.696547	0.103267	0.0660362	0.0604039
Lsat_1_v5_gn_9_8360	0.812425	0.101449	0.0996732	0.589152	0.593532	0.0500146
Lsat_1_v5_gn_3_115620	0.812398	0.645741	0.629573	0.080646	0.0861093	0.0502131
Lsat_1_v5_gn_9_4320	0.812355	0.226272	0.270282	0.374791	0.323039	0.0522599
Lsat_1_v5_gn_3_46260	0.81223	0.169863	0.46107	0.455085	0.166172	0.13869
Lsat_1_v5_gn_3_24101	0.812226	0.128788	0.484525	0.528554	0.152313	0.197773
Lsat_1_v5_gn_1_25201	0.812218	0.242355	0.366198	0.354746	0.232962	0.0648411
Lsat_1_v5_gn_9_44740	0.812094	0.0743112	0.0690475	0.665703	0.684414	0.0503098
Lsat_1_v5_gn_9_38300	0.812086	0.0902072	0.0557198	0.617686	0.746187	0.0652404
Lsat_1_v5_gn_4_180801	0.812053	0.524447	0.80396	0.130722	0.0501006	0.124877
Lsat_1_v5_gn_7_58180	0.812013	0.610309	0.672391	0.0929097	0.0723377	0.0531786
Lsat_1_v5_gn_2_4981	0.811871	0.20798	0.06284	0.39819	0.709276	0.127807
Lsat_1_v5_gn_4_6701	0.811867	0.490211	0.690646	0.148798	0.0673384	0.081796
Lsat_1_v5_gn_1_36080	0.811839	0.253928	0.088824	0.340641	0.621143	0.111138
Lsat_1_v5_gn_5_141920	0.811822	0.64013	0.711845	0.082232	0.0622505	0.0545942
Lsat_1_v5_gn_9_41940	0.811786	0.0878043	0.373027	0.623913	0.227033	0.187157
Lsat_1_v5_gn_8_12740	0.811777	0.288056	0.386901	0.303507	0.216294	0.0585457
Lsat_1_v5_gn_0_47681	0.811749	0.618802	0.70155	0.0896264	0.0646003	0.0558999
Lsat_1_v5_gn_4_174821	0.811687	0.768817	0.699186	0.0525531	0.0651497	0.0552086
Lsat_1_v5_gn_6_44121	0.811678	0.751431	0.51719	0.0548328	0.134143	0.0974711
Lsat_1_v5_gn_4_160720	0.811655	0.599897	0.31866	0.0967102	0.273472	0.112098
Lsat_1_v5_gn_4_142741	0.811585	0.776551	0.652433	0.0517393	0.0781461	0.0657148
Lsat_1_v5_gn_6_50280	0.811571	0.31969	0.640195	0.272413	0.0820949	0.131538
Lsat_1_v5_gn_6_71181	0.811503	0.398705	0.782398	0.207218	0.0512193	0.179463
Lsat_1_v5_gn_5_39040	0.811493	0.0701913	0.394242	0.679384	0.210493	0.246946
Lsat_1_v5_gn_5_1800	0.811491	0.164881	0.262847	0.462102	0.330076	0.063751
Lsat_1_v5_gn_6_115580	0.81145	0.57615	0.759213	0.106281	0.0536983	0.0805036
Lsat_1_v5_gn_2_72140	0.811435	0.517168	0.713061	0.133969	0.0618748	0.081433
Lactuca_sativa_newGene_1891	0.81126	0.605037	0.786085	0.0945043	0.050921	0.082318
Lsat_1_v5_gn_6_59080	0.811144	0.197887	0.272027	0.411193	0.319545	0.0569041
Lsat_1_v5_gn_4_96261	0.811118	0.359541	0.747388	0.237135	0.0553485	0.176693
Lsat_1_v5_gn_2_105900	0.811118	0.61783	0.767948	0.0896557	0.0525786	0.0716752
Lsat_1_v5_gn_4_41960	0.811107	0.40391	0.749299	0.203033	0.0550528	0.150225
Lsat_1_v5_gn_8_380	0.811104	0.670328	0.729012	0.072579	0.0585272	0.0532788
Lsat_1_v5_gn_3_109020	0.810995	0.0661641	0.261787	0.69416	0.330596	0.157275
Lsat_1_v5_gn_9_118341	0.810948	0.509525	0.733047	0.137574	0.0577403	0.0919071
Lsat_1_v5_gn_2_67061	0.81094	0.754658	0.67101	0.0542402	0.0723219	0.0569909
Lsat_1_v5_gn_3_34481	0.810935	0.343801	0.557648	0.250136	0.114062	0.0850066
Lsat_1_v5_gn_8_140221	0.810902	0.395069	0.391147	0.20926	0.21217	0.050012
Lsat_1_v5_gn_8_48020	0.810833	0.0649617	0.338431	0.698863	0.254668	0.21935
Lsat_1_v5_gn_5_19701	0.810792	0.151361	0.112388	0.484081	0.561171	0.0543191
Lsat_1_v5_gn_4_861	0.810689	0.312673	0.694573	0.277899	0.0659634	0.169577
Lsat_1_v5_gn_4_89360	0.810683	0.0970367	0.50893	0.597674	0.137682	0.271121
Lactuca_sativa_newGene_5615	0.810671	0.248674	0.679288	0.345149	0.0699215	0.208853
Lactuca_sativa_newGene_862	0.810488	0.619604	0.725036	0.0886934	0.059148	0.0599221
Lsat_1_v5_gn_8_150700	0.810377	0.215341	0.592471	0.386183	0.0989202	0.176294
Lsat_1_v5_gn_9_23261	0.810285	0.174648	0.0661003	0.444638	0.693497	0.0988852
Lsat_1_v5_gn_4_181860	0.810238	0.0939925	0.0932445	0.604925	0.6069	0.050003
Lsat_1_v5_gn_6_5080	0.810215	0.068414	0.420081	0.684338	0.190791	0.274445
Lactuca_sativa_newGene_7539	0.810185	0.142554	0.236886	0.499071	0.358559	0.0650062
Lsat_1_v5_gn_2_133060	0.810143	0.139213	0.117057	0.50524	0.54993	0.0514482
Lsat_1_v5_gn_6_108800	0.810092	0.313677	0.699527	0.276218	0.0645752	0.172385
Lsat_1_v5_gn_4_30740	0.810061	0.100836	0.448663	0.587255	0.171895	0.216534
Lsat_1_v5_gn_9_15261	0.809976	0.794923	0.541927	0.0503364	0.120682	0.110898
Lsat_1_v5_gn_2_20000	0.80995	0.255564	0.345367	0.33622	0.247652	0.0578015
Lsat_1_v5_gn_8_115061	0.809828	0.598827	0.138845	0.0961112	0.505472	0.270286
Lsat_1_v5_gn_8_135021	0.809783	0.296663	0.489916	0.292281	0.147251	0.0802484
Lsat_1_v5_gn_8_30701	0.809781	0.7293	0.638995	0.0581688	0.0816733	0.0574783
Lsat_1_v5_gn_9_92641	0.809619	0.15889	0.0584818	0.469358	0.727434	0.104769
Lsat_1_v5_gn_4_117200	0.809618	0.405498	0.244166	0.200373	0.349028	0.0740921
Lsat_1_v5_gn_2_94200	0.809523	0.650212	0.74135	0.0779601	0.0560094	0.0578781
Lsat_1_v5_gn_4_103420	0.809493	0.446495	0.208475	0.17274	0.394137	0.104478
Lsat_1_v5_gn_5_136361	0.809486	0.108597	0.105423	0.567908	0.575337	0.0500411
Lsat_1_v5_gn_1_27900	0.809283	0.0525678	0.233279	0.765975	0.361743	0.190606
Lsat_1_v5_gn_2_6461	0.809201	0.274364	0.0602028	0.314493	0.718171	0.185698
Lsat_1_v5_gn_6_115360	0.809157	0.447238	0.0704937	0.171964	0.675186	0.290388
Lsat_1_v5_gn_3_61260	0.809134	0.414312	0.616138	0.193694	0.0892573	0.0805394
Lsat_1_v5_gn_2_126361	0.809117	0.169026	0.125283	0.451882	0.531092	0.05455
Lsat_1_v5_gn_6_15541	0.809095	0.2732	0.597311	0.3156	0.0962951	0.13617
Lsat_1_v5_gn_8_87260	0.80907	0.372716	0.555127	0.224299	0.113976	0.0749703
Lactuca_sativa_newGene_2588	0.80891	0.710414	0.267856	0.0617594	0.321136	0.217203
Lactuca_sativa_newGene_1180	0.808899	0.0935946	0.0593271	0.604076	0.722166	0.0622163
Lsat_1_v5_gn_4_31900	0.808871	0.351547	0.733316	0.241201	0.0572407	0.171201
Lsat_1_v5_gn_3_32080	0.808843	0.235409	0.491483	0.358522	0.145623	0.108076
Lsat_1_v5_gn_2_60440	0.808843	0.255765	0.775517	0.334511	0.0515562	0.293366
Lsat_1_v5_gn_4_108320	0.808784	0.49955	0.491165	0.141188	0.14575	0.0500507
Lsat_1_v5_gn_9_125181	0.808724	0.513098	0.119523	0.134015	0.542562	0.232304
Lsat_1_v5_gn_4_155900	0.808709	0.80055	0.510815	0.0501001	0.135183	0.129185
Lsat_1_v5_gn_0_43840	0.808681	0.697485	0.725563	0.0646308	0.0586191	0.0507757
Lsat_1_v5_gn_2_15941	0.808555	0.681824	0.77286	0.0685028	0.0517713	0.0587397
Lsat_1_v5_gn_4_35260	0.808518	0.555754	0.72766	0.113334	0.0581876	0.0751817
Lsat_1_v5_gn_8_23200	0.808502	0.0595165	0.21452	0.720718	0.384637	0.142048
Lsat_1_v5_gn_0_18301	0.808501	0.352808	0.774921	0.239733	0.051576	0.20524
Lsat_1_v5_gn_2_104420	0.808454	0.719538	0.673736	0.0597393	0.0706364	0.0519749
Lsat_1_v5_gn_8_89640	0.808324	0.135493	0.522889	0.509656	0.128757	0.215548
Lsat_1_v5_gn_5_117460	0.808166	0.554259	0.594899	0.113777	0.0967197	0.0512342
Lsat_1_v5_gn_2_90560	0.808151	0.458831	0.77201	0.163905	0.0518097	0.135783
Lsat_1_v5_gn_7_114400	0.808088	0.285007	0.102261	0.301912	0.580932	0.111892
Lsat_1_v5_gn_8_49101	0.808065	0.303592	0.358392	0.283349	0.234647	0.0526432
Lsat_1_v5_gn_2_99200	0.808063	0.308664	0.405912	0.278479	0.19851	0.0579098
Lsat_1_v5_gn_5_139440	0.808056	0.788578	0.622021	0.0505496	0.0866288	0.0780139
Lsat_1_v5_gn_3_94020	0.808037	0.0958337	0.103976	0.596999	0.576708	0.0503112
Lsat_1_v5_gn_1_95341	0.80803	0.187531	0.138226	0.42174	0.504009	0.0549535
Lsat_1_v5_gn_9_32460	0.807897	0.625154	0.695077	0.0854632	0.0649655	0.0542011
Lsat_1_v5_gn_3_76001	0.807847	0.146113	0.571881	0.489137	0.105887	0.237603
Lsat_1_v5_gn_2_78480	0.807796	0.239801	0.367615	0.351769	0.226933	0.0658636
Lsat_1_v5_gn_8_167261	0.807742	0.779059	0.557248	0.0511599	0.112166	0.0958257
Lsat_1_v5_gn_4_154921	0.807683	0.665138	0.790653	0.0727564	0.0504222	0.0668941
Lactuca_sativa_newGene_5374	0.807473	0.0584496	0.225863	0.724984	0.368521	0.154339
Lactuca_sativa_newGene_918	0.807405	0.719486	0.7573	0.0594926	0.0533458	0.0515517
Lsat_1_v5_gn_1_2220	0.807396	0.638408	0.561286	0.0807939	0.110165	0.054595
Lsat_1_v5_gn_1_34401	0.807374	0.414574	0.093401	0.191779	0.602435	0.205753
Lsat_1_v5_gn_4_115841	0.807349	0.698249	0.635306	0.0640508	0.0817862	0.0534532
Lsat_1_v5_gn_5_128101	0.807336	0.22808	0.0766016	0.365538	0.651647	0.11362
Lsat_1_v5_gn_5_104780	0.807316	0.359452	0.323623	0.232953	0.263685	0.051099
Lsat_1_v5_gn_7_105821	0.807302	0.152293	0.614591	0.477339	0.0888905	0.263648
Lsat_1_v5_gn_6_8820	0.807148	0.735012	0.337499	0.0565909	0.251185	0.182201
Lsat_1_v5_gn_7_5021	0.807113	0.424989	0.809339	0.184469	0.0500076	0.186607
Lactuca_sativa_newGene_873	0.806972	0.471113	0.718273	0.155603	0.0596271	0.0996833
Lsat_1_v5_gn_3_12060	0.806951	0.189793	0.249363	0.416869	0.339343	0.054814
Lsat_1_v5_gn_1_86321	0.806913	0.521155	0.801669	0.128597	0.0500413	0.12488
Lsat_1_v5_gn_6_116540	0.806897	0.0603212	0.374989	0.714733	0.220187	0.268654
Lsat_1_v5_gn_1_97221	0.806862	0.392624	0.0890417	0.206866	0.613556	0.198554
Lsat_1_v5_gn_2_17540	0.806822	0.716052	0.769846	0.0600344	0.0518761	0.0532083
Lsat_1_v5_gn_3_95361	0.806798	0.745372	0.731422	0.0548831	0.0571349	0.0502106
Lsat_1_v5_gn_9_15841	0.806758	0.424902	0.721527	0.184189	0.0589403	0.12151
Lsat_1_v5_gn_8_25940	0.806725	0.811637	0.571926	0.0500373	0.10519	0.108208
Lsat_1_v5_gn_6_12141	0.806644	0.35588	0.803759	0.23512	0.0500126	0.231944
Lsat_1_v5_gn_9_6280	0.806558	0.643461	0.610423	0.0788121	0.0900204	0.0508738
Lactuca_sativa_newGene_7466	0.806501	0.67683	0.788259	0.0691105	0.0504794	0.0634684
Lsat_1_v5_gn_3_70480	0.806454	0.142198	0.127247	0.494277	0.523211	0.0506038
Lsat_1_v5_gn_4_130881	0.806435	0.504486	0.784656	0.136754	0.0506763	0.121488
Lsat_1_v5_gn_1_127780	0.806342	0.758771	0.730486	0.0530171	0.0572026	0.050889
Lsat_1_v5_gn_4_21041	0.806278	0.570333	0.802128	0.105591	0.0500258	0.103136
Lsat_1_v5_gn_4_25161	0.806263	0.133894	0.420467	0.509745	0.186689	0.150971
Lsat_1_v5_gn_2_100821	0.806209	0.4644	0.746153	0.158889	0.0546678	0.116864
Lsat_1_v5_gn_6_20120	0.806173	0.428628	0.792715	0.18117	0.050264	0.169084
Lsat_1_v5_gn_8_27601	0.806168	0.55001	0.769348	0.114392	0.0518545	0.093756
Lsat_1_v5_gn_9_99900	0.806152	0.194094	0.474668	0.409497	0.152866	0.126576
Lsat_1_v5_gn_6_86541	0.806129	0.604602	0.177505	0.0919368	0.434185	0.223108
Lsat_1_v5_gn_6_50720	0.806122	0.237551	0.114868	0.35222	0.548889	0.0794125
Lsat_1_v5_gn_4_150561	0.806121	0.250772	0.168192	0.336611	0.448894	0.059941
Lactuca_sativa_newGene_309	0.805997	0.55009	0.668621	0.114244	0.0711508	0.0610993
Lsat_1_v5_gn_3_4640	0.805988	0.701589	0.723289	0.0628935	0.0584281	0.0504645
Lsat_1_v5_gn_7_109361	0.805971	0.210896	0.60018	0.385934	0.0935069	0.185411
Lsat_1_v5_gn_2_108920	0.805945	0.686129	0.483432	0.066537	0.147744	0.0823218
Lsat_1_v5_gn_3_20581	0.805922	0.456334	0.80525	0.163464	0.0500007	0.162879
Lsat_1_v5_gn_1_117561	0.805885	0.505399	0.775571	0.13586	0.0512763	0.115405
Lactuca_sativa_newGene_4860	0.805838	0.423489	0.3019	0.184258	0.282252	0.0623135
Lsat_1_v5_gn_2_94140	0.805818	0.453424	0.637822	0.16514	0.0802864	0.0756464
Lsat_1_v5_gn_8_149701	0.805771	0.684418	0.493067	0.0669086	0.142316	0.0788117
Lsat_1_v5_gn_9_41461	0.805631	0.108697	0.154471	0.562128	0.471124	0.0560237
Lsat_1_v5_gn_2_96600	0.805623	0.717651	0.503125	0.0594227	0.136849	0.087722
Lsat_1_v5_gn_4_3040	0.805576	0.290816	0.614032	0.292852	0.0882311	0.134314
Lsat_1_v5_gn_8_69540	0.805541	0.430019	0.757472	0.179667	0.0530637	0.141206
Lsat_1_v5_gn_8_115821	0.805442	0.740138	0.517751	0.0554343	0.12923	0.092061
Lsat_1_v5_gn_5_29420	0.805429	0.459885	0.32294	0.160903	0.262076	0.0649206
Lsat_1_v5_gn_5_21360	0.80533	0.604549	0.775547	0.091543	0.0512298	0.0781766
Lsat_1_v5_gn_4_146041	0.805258	0.658141	0.728264	0.0738403	0.0573637	0.0546033
Lsat_1_v5_gn_9_43440	0.805241	0.0524914	0.144001	0.762117	0.489199	0.114765
Lsat_1_v5_gn_7_73641	0.805212	0.0691669	0.0876278	0.674932	0.615229	0.0529604
Lactuca_sativa_newGene_6930	0.805196	0.75659	0.332543	0.0531229	0.253255	0.203986
Lactuca_sativa_newGene_2217	0.805088	0.713697	0.502216	0.0600775	0.136919	0.0864656
Lsat_1_v5_gn_5_154020	0.805082	0.702075	0.390477	0.0625316	0.206619	0.127645
Lsat_1_v5_gn_1_28060	0.805072	0.734271	0.536534	0.0563015	0.11987	0.0832738
Lsat_1_v5_gn_3_27741	0.805041	0.432056	0.791846	0.177878	0.0502522	0.166212
Lsat_1_v5_gn_9_121300	0.804984	0.0721622	0.1045	0.663653	0.571089	0.0568105
Lsat_1_v5_gn_6_116920	0.804917	0.125598	0.0894681	0.524347	0.609661	0.0554326
Lsat_1_v5_gn_9_24201	0.804913	0.446721	0.637254	0.168463	0.0800737	0.0773825
Lsat_1_v5_gn_2_118200	0.804874	0.731555	0.687238	0.0567156	0.0659237	0.0519231
Lsat_1_v5_gn_5_175601	0.804817	0.404307	0.628883	0.196411	0.0827621	0.0881616
Lsat_1_v5_gn_9_27161	0.804771	0.125716	0.0681971	0.523895	0.678066	0.068751
Lsat_1_v5_gn_8_161140	0.804693	0.576963	0.814006	0.101906	0.0501344	0.107525
Lsat_1_v5_gn_2_66341	0.80463	0.586083	0.668347	0.0982137	0.070732	0.0554566
Lsat_1_v5_gn_9_32220	0.80457	0.185946	0.415639	0.419169	0.188333	0.10513
Lsat_1_v5_gn_6_80961	0.804531	0.0541536	0.0593893	0.747849	0.716481	0.0510415
Lsat_1_v5_gn_5_146360	0.804366	0.446253	0.247528	0.168268	0.338044	0.0851662
Lsat_1_v5_gn_8_2401	0.804314	0.705147	0.670659	0.061654	0.0699927	0.0510904
Lsat_1_v5_gn_5_35300	0.804284	0.569579	0.741168	0.104715	0.0550709	0.0758547
Lsat_1_v5_gn_4_135621	0.804224	0.332201	0.776989	0.252437	0.0510289	0.223415
Lsat_1_v5_gn_0_37261	0.804154	0.772711	0.4907	0.0513559	0.142332	0.120428
Lsat_1_v5_gn_4_85040	0.804136	0.381553	0.7312	0.212277	0.0566268	0.150768
Lsat_1_v5_gn_6_80160	0.80404	0.578343	0.676094	0.100971	0.068462	0.0577303
Lsat_1_v5_gn_4_75941	0.804021	0.590032	0.66571	0.0963363	0.0712359	0.0546175
Lsat_1_v5_gn_3_8800	0.803983	0.431417	0.777495	0.177317	0.0509738	0.154989
Lsat_1_v5_gn_4_6680	0.803946	0.189555	0.645331	0.412968	0.0771349	0.241592
Lsat_1_v5_gn_4_45420	0.803869	0.54174	0.49351	0.116651	0.140598	0.0516826
Lsat_1_v5_gn_9_100280	0.803846	0.232282	0.477097	0.355582	0.149595	0.103794
Lsat_1_v5_gn_3_46860	0.803819	0.510925	0.722301	0.131487	0.0581233	0.0869493
Lsat_1_v5_gn_1_33941	0.803798	0.567779	0.625101	0.105179	0.0835582	0.05252
Lsat_1_v5_gn_5_165321	0.803672	0.347505	0.775835	0.23874	0.0510698	0.210152
Lsat_1_v5_gn_3_9661	0.803658	0.121145	0.425576	0.531796	0.180827	0.169341
Lsat_1_v5_gn_7_102521	0.80365	0.0507454	0.130562	0.780559	0.512511	0.115211
Lsat_1_v5_gn_9_48121	0.803519	0.247736	0.556761	0.336688	0.109716	0.131124
Lsat_1_v5_gn_7_29201	0.803512	0.453555	0.805328	0.163052	0.050005	0.164631
Lsat_1_v5_gn_9_46880	0.803367	0.421152	0.435239	0.183482	0.174299	0.0501479
Lactuca_sativa_newGene_5001	0.803336	0.167433	0.572705	0.446133	0.102863	0.211041
Lsat_1_v5_gn_4_12441	0.803293	0.570893	0.772561	0.103585	0.0512914	0.0877986
Lsat_1_v5_gn_1_21441	0.803226	0.0537066	0.225773	0.749692	0.362847	0.176284
Lsat_1_v5_gn_1_128660	0.803225	0.584953	0.790922	0.0978793	0.0502175	0.0914541
Lsat_1_v5_gn_6_56420	0.803024	0.373052	0.299933	0.217584	0.280735	0.0546583
Lsat_1_v5_gn_3_98161	0.802955	0.496807	0.372664	0.138147	0.21781	0.0615979
Lsat_1_v5_gn_3_59460	0.802851	0.705546	0.777078	0.0611837	0.0509179	0.0556621
Lsat_1_v5_gn_5_44521	0.802824	0.536447	0.802691	0.118403	0.05	0.118315
Lsat_1_v5_gn_9_23900	0.802782	0.120729	0.0680742	0.531418	0.675962	0.0664938
Lsat_1_v5_gn_8_137141	0.80275	0.552495	0.80174	0.111102	0.0500015	0.110473
Lsat_1_v5_gn_5_171121	0.802649	0.732526	0.738509	0.0561168	0.0551825	0.0500383
Lsat_1_v5_gn_7_31721	0.802636	0.234959	0.050821	0.35069	0.778291	0.21004
Lsat_1_v5_gn_6_49500	0.802618	0.333815	0.114127	0.249199	0.545507	0.124592
Lsat_1_v5_gn_6_57280	0.802609	0.167503	0.267095	0.444985	0.313824	0.063932
Lsat_1_v5_gn_7_112340	0.802494	0.601202	0.768975	0.0913199	0.0515187	0.0766783
Lsat_1_v5_gn_7_73901	0.802493	0.146161	0.0646741	0.481309	0.689408	0.0841682
Lsat_1_v5_gn_1_71481	0.802492	0.055865	0.287503	0.73391	0.292367	0.216296
Lactuca_sativa_newGene_1079	0.802482	0.496278	0.741457	0.138068	0.0547191	0.100774
Lsat_1_v5_gn_4_65361	0.802409	0.243037	0.502766	0.340723	0.134625	0.108669
Lsat_1_v5_gn_7_2520	0.802355	0.263836	0.745252	0.317044	0.0541651	0.252883
Lsat_1_v5_gn_6_3960	0.802333	0.0736447	0.108793	0.654931	0.557203	0.0574716
Lsat_1_v5_gn_7_12200	0.802326	0.253523	0.426632	0.32849	0.178903	0.0767882
Lsat_1_v5_gn_4_14920	0.802316	0.149226	0.53875	0.475558	0.117004	0.208726
Lsat_1_v5_gn_5_81661	0.802206	0.693619	0.784188	0.0636156	0.0504564	0.0590475
Lsat_1_v5_gn_2_30500	0.802175	0.127895	0.0915317	0.51573	0.600182	0.055284
Lsat_1_v5_gn_7_20501	0.802152	0.253938	0.0830507	0.327796	0.624371	0.11902
Lsat_1_v5_gn_2_130641	0.802141	0.282118	0.662484	0.297411	0.0714439	0.169342
Lsat_1_v5_gn_7_109900	0.802132	0.572761	0.619147	0.102144	0.0847986	0.0516471
Lsat_1_v5_gn_3_5900	0.802064	0.352099	0.600485	0.233179	0.0913639	0.0972855
Lsat_1_v5_gn_4_99201	0.802019	0.05895	0.223017	0.715688	0.364705	0.150366
Lsat_1_v5_gn_3_35820	0.802013	0.306739	0.758277	0.273012	0.0525151	0.226444
Lsat_1_v5_gn_6_109401	0.802	0.464373	0.083724	0.155362	0.622148	0.265737
Lsat_1_v5_gn_4_42380	0.801968	0.657298	0.177763	0.0728307	0.427879	0.266281
Lsat_1_v5_gn_9_121380	0.801942	0.291098	0.577907	0.288093	0.099957	0.116107
Lsat_1_v5_gn_5_149640	0.801877	0.0649399	0.154669	0.687498	0.465393	0.0887606
Lsat_1_v5_gn_5_182420	0.801833	0.736968	0.765814	0.0552706	0.0517365	0.0509514
Lsat_1_v5_gn_4_121681	0.801783	0.616629	0.79934	0.0854952	0.0500088	0.0843605
Lsat_1_v5_gn_5_177800	0.801771	0.617059	0.777618	0.0853422	0.0508047	0.0752743
Lsat_1_v5_gn_1_7381	0.801686	0.728235	0.752314	0.0566342	0.0531578	0.0506327
Lsat_1_v5_gn_5_173341	0.801638	0.595656	0.570438	0.0929321	0.102809	0.0504788
Lsat_1_v5_gn_1_91820	0.801632	0.145226	0.359274	0.481772	0.226912	0.108725
Lsat_1_v5_gn_1_88361	0.801627	0.0874596	0.206591	0.610753	0.385744	0.0882517
Lsat_1_v5_gn_7_1760	0.801622	0.408001	0.752159	0.190731	0.0531675	0.149878
Lsat_1_v5_gn_9_62200	0.801618	0.0807137	0.0565867	0.630788	0.728438	0.0586552
Lsat_1_v5_gn_4_74980	0.801594	0.281923	0.74098	0.296933	0.0546391	0.231824
Lsat_1_v5_gn_2_38600	0.801594	0.0543596	0.417857	0.742961	0.184019	0.343886
Lsat_1_v5_gn_8_157461	0.801584	0.403768	0.748877	0.193628	0.0535696	0.15001
Lsat_1_v5_gn_3_28221	0.801564	0.364961	0.0842744	0.222334	0.619916	0.188569
Lactuca_sativa_newGene_1633	0.801527	0.737856	0.330727	0.0550836	0.250651	0.18938
Lactuca_sativa_newGene_7471	0.801522	0.582588	0.799836	0.09787	0.0500042	0.0969512
Lsat_1_v5_gn_8_30300	0.801447	0.647885	0.794643	0.0753585	0.0500669	0.0727734
Lsat_1_v5_gn_1_83160	0.801423	0.605891	0.74018	0.0890833	0.0547255	0.0662864
Lsat_1_v5_gn_7_74401	0.801396	0.57341	0.755285	0.101459	0.0527712	0.0798343
Lsat_1_v5_gn_9_61840	0.801342	0.742387	0.660057	0.0543991	0.0718251	0.0565202
Lsat_1_v5_gn_5_34601	0.801326	0.17386	0.363604	0.433041	0.22315	0.0915023
Lsat_1_v5_gn_0_840	0.801306	0.302504	0.0519757	0.276197	0.762709	0.258569
Lactuca_sativa_newGene_4893	0.801282	0.280435	0.0512544	0.298077	0.770836	0.246525
Lsat_1_v5_gn_9_54880	0.801227	0.525178	0.156549	0.122638	0.461235	0.190498
Lsat_1_v5_gn_7_109981	0.801192	0.397396	0.761293	0.19773	0.0521033	0.163002
Lsat_1_v5_gn_4_65140	0.801184	0.270936	0.69658	0.307901	0.0626644	0.203159
Lsat_1_v5_gn_1_37841	0.801096	0.125969	0.56336	0.518101	0.105428	0.261345
Lsat_1_v5_gn_5_170380	0.801083	0.574564	0.758444	0.100814	0.0523851	0.0806951
Lsat_1_v5_gn_8_5261	0.801021	0.601645	0.734996	0.0904131	0.0554257	0.0658616
Lsat_1_v5_gn_9_65040	0.800972	0.358719	0.105078	0.226648	0.564019	0.149725
Lsat_1_v5_gn_5_178661	0.800948	0.402907	0.691576	0.193614	0.0637195	0.115867
Lsat_1_v5_gn_8_15080	0.800921	0.616031	0.403453	0.0852958	0.193207	0.0839895
Lsat_1_v5_gn_3_98920	0.800823	0.138659	0.504118	0.492785	0.132764	0.198033
Lsat_1_v5_gn_6_17181	0.800795	0.567029	0.730325	0.103724	0.0561177	0.0729806
Lsat_1_v5_gn_9_111580	0.800781	0.34817	0.133512	0.23501	0.502598	0.113127
Lsat_1_v5_gn_5_26000	0.800766	0.486616	0.725115	0.141913	0.0569758	0.096833
Lsat_1_v5_gn_1_105000	0.800698	0.445781	0.205797	0.165347	0.385553	0.105746
Lsat_1_v5_gn_6_93360	0.800611	0.350565	0.609431	0.232856	0.0874334	0.101544
Lsat_1_v5_gn_2_86580	0.800514	0.785366	0.560917	0.050322	0.10611	0.0976572
Lsat_1_v5_gn_5_149981	0.800508	0.660613	0.797559	0.0713692	0.0500126	0.0703253
Lsat_1_v5_gn_3_9940	0.80039	0.100767	0.0970371	0.573707	0.583139	0.0500666
Lsat_1_v5_gn_6_54241	0.800372	0.735862	0.716575	0.0551798	0.0584086	0.0503847
Lsat_1_v5_gn_5_117101	0.800327	0.246624	0.666483	0.333809	0.0697187	0.200752
Lsat_1_v5_gn_7_32880	0.800327	0.714268	0.754951	0.058829	0.0526732	0.0517707
Lsat_1_v5_gn_2_83060	0.800274	0.421633	0.805314	0.180291	0.0500378	0.185
Lsat_1_v5_gn_5_32481	0.800274	0.744613	0.651569	0.0539285	0.073828	0.0582734
Lsat_1_v5_gn_5_116300	0.800235	0.619807	0.716436	0.083702	0.0584036	0.0582267
Lsat_1_v5_gn_8_102701	0.800199	0.217215	0.477812	0.369706	0.146283	0.112712
Lsat_1_v5_gn_3_72820	0.800167	0.654945	0.773987	0.0728245	0.0509321	0.0644224
Lsat_1_v5_gn_8_133541	0.800155	0.765129	0.329485	0.0516313	0.250185	0.214186
Lsat_1_v5_gn_2_80160	0.800134	0.354783	0.727427	0.228913	0.0564622	0.164711
Lsat_1_v5_gn_8_120760	0.800132	0.454825	0.7664	0.159411	0.0515177	0.134063
Lsat_1_v5_gn_8_44380	0.800086	0.567145	0.764947	0.103265	0.0516409	0.0857373
Lsat_1_v5_gn_5_48061	0.799982	0.787573	0.704814	0.050217	0.0606011	0.0577639
Lsat_1_v5_gn_1_48480	0.79997	0.609256	0.810198	0.0871868	0.0501578	0.0923382
Lsat_1_v5_gn_6_7620	0.799968	0.627759	0.146775	0.0809706	0.476596	0.283243
Lsat_1_v5_gn_7_21320	0.799955	0.585021	0.68579	0.0960752	0.0647674	0.0583441
Lactuca_sativa_newGene_6156	0.799928	0.146099	0.512934	0.477759	0.127691	0.194659
Lsat_1_v5_gn_7_51000	0.799915	0.401029	0.775228	0.193928	0.0508308	0.171851
Lsat_1_v5_gn_8_147281	0.799907	0.358207	0.60554	0.225924	0.0884644	0.0967811
Lsat_1_v5_gn_1_120800	0.799833	0.396743	0.592328	0.196866	0.0932397	0.0785818
Lactuca_sativa_newGene_1944	0.799772	0.371017	0.0556961	0.215765	0.731778	0.290781
Lsat_1_v5_gn_7_39020	0.799763	0.707149	0.789169	0.0600761	0.0501588	0.057688
Lsat_1_v5_gn_5_168880	0.799751	0.145537	0.0588377	0.478526	0.713523	0.0947268
Lsat_1_v5_gn_9_71481	0.799731	0.526568	0.680471	0.120965	0.0659687	0.0687514
Lsat_1_v5_gn_9_71340	0.799626	0.590241	0.801719	0.0939149	0.0500064	0.0950178
Lsat_1_v5_gn_6_1600	0.799551	0.29784	0.735798	0.278594	0.0550468	0.213365
Lsat_1_v5_gn_5_122201	0.799518	0.770163	0.722344	0.0511583	0.0571953	0.0525665
Lsat_1_v5_gn_6_60880	0.799493	0.0814758	0.237333	0.625555	0.343675	0.11172
Lsat_1_v5_gn_4_135460	0.79943	0.606629	0.667821	0.0878487	0.0690596	0.0530633
Lsat_1_v5_gn_5_39440	0.799364	0.676752	0.569185	0.0667649	0.102015	0.0593146
Lsat_1_v5_gn_9_99621	0.799363	0.509439	0.52773	0.129028	0.120172	0.0502416
Lsat_1_v5_gn_8_45140	0.799358	0.0678129	0.113261	0.672566	0.54281	0.0633093
Lsat_1_v5_gn_5_169961	0.799352	0.1744	0.657917	0.429425	0.0716949	0.271196
Lactuca_sativa_newGene_4650	0.799257	0.288193	0.106631	0.287727	0.557914	0.108904
Lsat_1_v5_gn_1_52760	0.799233	0.77422	0.70431	0.050849	0.060516	0.0553609
Lsat_1_v5_gn_9_4341	0.799181	0.446565	0.736164	0.163565	0.0549296	0.119469
Lsat_1_v5_gn_9_40060	0.79912	0.289017	0.46462	0.28674	0.152855	0.0754933
Lsat_1_v5_gn_8_119040	0.799119	0.511681	0.757789	0.127742	0.0522249	0.102804
Lsat_1_v5_gn_6_39480	0.799067	0.193394	0.749094	0.400627	0.0531876	0.337951
Lsat_1_v5_gn_5_91381	0.798981	0.0838878	0.374799	0.617546	0.212074	0.196394
Lsat_1_v5_gn_5_40001	0.79896	0.178142	0.429702	0.423083	0.173872	0.116589
Lsat_1_v5_gn_8_11721	0.798925	0.359493	0.812676	0.223863	0.0502866	0.238945
Lsat_1_v5_gn_1_50780	0.798813	0.508713	0.768675	0.129001	0.0512138	0.109921
Lsat_1_v5_gn_0_38321	0.798803	0.63294	0.761254	0.0788299	0.0518501	0.0658872
Lsat_1_v5_gn_5_13720	0.798765	0.353466	0.737381	0.228514	0.054684	0.173002
Lsat_1_v5_gn_2_73301	0.798757	0.316028	0.0867357	0.260596	0.608891	0.151059
Lsat_1_v5_gn_1_2380	0.798685	0.535448	0.804493	0.116154	0.0500498	0.119988
Lsat_1_v5_gn_8_95280	0.798679	0.604818	0.299006	0.0881242	0.276434	0.124771
Lsat_1_v5_gn_3_49981	0.798659	0.422151	0.499534	0.178476	0.133534	0.0543836
Lsat_1_v5_gn_7_110921	0.798629	0.504381	0.756401	0.131044	0.0523118	0.105063
Lsat_1_v5_gn_6_84181	0.798575	0.297625	0.111377	0.277642	0.545957	0.108859
Lsat_1_v5_gn_3_30521	0.798524	0.74067	0.670266	0.0541875	0.0681253	0.0548173
Lsat_1_v5_gn_7_6521	0.798508	0.338457	0.6918	0.240639	0.0629804	0.150772
Lsat_1_v5_gn_1_126440	0.798471	0.456183	0.301965	0.157223	0.273354	0.0694214
Lsat_1_v5_gn_2_93681	0.798464	0.350615	0.708281	0.230504	0.0595406	0.154028
Lsat_1_v5_gn_4_107401	0.798427	0.495557	0.719035	0.135417	0.0575435	0.0909078
Lsat_1_v5_gn_5_137340	0.798405	0.602308	0.769159	0.0888803	0.0511431	0.0764237
Lsat_1_v5_gn_4_164560	0.798308	0.64915	0.724764	0.0737777	0.0565439	0.0552646
Lsat_1_v5_gn_1_50121	0.798305	0.535953	0.619107	0.11568	0.0830628	0.0552103
Lsat_1_v5_gn_4_27800	0.798283	0.481541	0.734356	0.142749	0.0550412	0.103197
Lsat_1_v5_gn_5_151221	0.798262	0.130715	0.344022	0.504512	0.235707	0.113572
Lsat_1_v5_gn_9_64001	0.798193	0.678917	0.73927	0.0658707	0.0543265	0.0535735
Lsat_1_v5_gn_2_88741	0.798181	0.659822	0.725413	0.0707558	0.0564125	0.0540168
Lsat_1_v5_gn_6_108381	0.798144	0.600752	0.67028	0.0893078	0.067997	0.0539473
Lsat_1_v5_gn_6_25840	0.798085	0.119732	0.43443	0.526858	0.170106	0.176861
Lsat_1_v5_gn_8_121961	0.798049	0.303384	0.318831	0.271512	0.25725	0.0502206
Lsat_1_v5_gn_4_66781	0.797987	0.686559	0.393139	0.0640134	0.197631	0.117899
Lsat_1_v5_gn_0_47300	0.797939	0.218856	0.641894	0.36456	0.0757532	0.207769
Lsat_1_v5_gn_5_168561	0.797937	0.702214	0.738379	0.0606179	0.0544087	0.0513269
Lsat_1_v5_gn_7_111120	0.797897	0.410072	0.687115	0.185799	0.0638607	0.110365
Lsat_1_v5_gn_8_70480	0.797881	0.426628	0.768112	0.174878	0.0511795	0.15068
Lsat_1_v5_gn_5_174940	0.797872	0.58696	0.779571	0.094236	0.0504592	0.0854497
Lsat_1_v5_gn_2_109060	0.797838	0.321709	0.616258	0.254434	0.0838004	0.118217
Lsat_1_v5_gn_2_35600	0.797767	0.373171	0.76924	0.212072	0.0510858	0.185395
Lsat_1_v5_gn_9_34440	0.797748	0.712476	0.331206	0.0585794	0.245999	0.169556
Lsat_1_v5_gn_1_71961	0.797745	0.690497	0.696618	0.0630576	0.06173	0.0500348
Lsat_1_v5_gn_8_141900	0.797722	0.438499	0.78362	0.167254	0.0502755	0.155614
Lsat_1_v5_gn_1_36841	0.797714	0.302686	0.667374	0.271781	0.0685999	0.158134
Lsat_1_v5_gn_5_109081	0.79769	0.165401	0.654354	0.441463	0.0720793	0.280109
Lsat_1_v5_gn_8_81960	0.797684	0.0600651	0.059172	0.704656	0.709246	0.0500204
Lsat_1_v5_gn_2_83960	0.797624	0.623678	0.767984	0.0812676	0.051168	0.0701569
Lsat_1_v5_gn_8_97580	0.797539	0.0630127	0.146516	0.690442	0.473623	0.0870847
Lactuca_sativa_newGene_1707	0.797477	0.611067	0.806852	0.085387	0.0501302	0.0899361
Lsat_1_v5_gn_9_3041	0.79741	0.092276	0.591392	0.591575	0.0923436	0.355973
Lsat_1_v5_gn_5_158120	0.797359	0.0890533	0.161436	0.600389	0.447532	0.0672735
Lsat_1_v5_gn_6_96600	0.797267	0.350187	0.642715	0.229574	0.0752477	0.116705
Lsat_1_v5_gn_6_104401	0.797232	0.225784	0.204885	0.354844	0.382087	0.0506008
Lsat_1_v5_gn_4_67821	0.79721	0.708668	0.739165	0.0591724	0.0541862	0.050955
Lsat_1_v5_gn_4_165541	0.797151	0.719674	0.656867	0.0571682	0.0711942	0.0536356
Lsat_1_v5_gn_5_113361	0.797047	0.50458	0.77984	0.129818	0.0504052	0.118391
Lactuca_sativa_newGene_3661	0.797018	0.760071	0.743485	0.0517771	0.0535921	0.0503147
Lsat_1_v5_gn_3_84440	0.796943	0.582857	0.385486	0.0953046	0.202116	0.079173
Lsat_1_v5_gn_5_117761	0.796939	0.360029	0.670704	0.221363	0.0674988	0.126062
Lsat_1_v5_gn_4_185601	0.796938	0.0689981	0.0860315	0.664836	0.608452	0.0525962
Lsat_1_v5_gn_4_29721	0.796925	0.159231	0.60128	0.450615	0.0885264	0.243115
Lsat_1_v5_gn_8_152141	0.796844	0.342985	0.0553895	0.235036	0.730343	0.267626
Lsat_1_v5_gn_3_53161	0.796725	0.0681113	0.0514896	0.668007	0.763004	0.0591324
Lsat_1_v5_gn_3_22861	0.796659	0.651102	0.799114	0.0726101	0.0500087	0.0735229
Lsat_1_v5_gn_1_59360	0.79664	0.0523279	0.0570456	0.75403	0.719784	0.0512646
Lsat_1_v5_gn_3_20400	0.796631	0.245589	0.708999	0.330251	0.0589765	0.236723
Lsat_1_v5_gn_5_144600	0.796609	0.274759	0.0511699	0.298211	0.766861	0.242339
Lsat_1_v5_gn_8_34100	0.796447	0.178411	0.389873	0.419189	0.198468	0.0991243
Lsat_1_v5_gn_3_118161	0.796415	0.705591	0.78438	0.0595778	0.0502003	0.056991
Lsat_1_v5_gn_4_166600	0.79623	0.273407	0.674441	0.299158	0.0663507	0.184316
Lsat_1_v5_gn_9_15821	0.796183	0.496514	0.779491	0.133288	0.05038	0.121952
Lsat_1_v5_gn_8_46161	0.796122	0.765643	0.46856	0.0512228	0.148227	0.126627
Lactuca_sativa_newGene_1401	0.796054	0.635328	0.782369	0.0769709	0.0502573	0.0718679
Lsat_1_v5_gn_5_148140	0.796036	0.589056	0.558827	0.0925086	0.10436	0.0506819
Lsat_1_v5_gn_1_32600	0.796026	0.750039	0.723188	0.0526823	0.0563597	0.0507758
Lactuca_sativa_newGene_3777	0.79594	0.0744929	0.0624855	0.643551	0.690854	0.0519476
Lsat_1_v5_gn_2_81280	0.795914	0.571951	0.812914	0.0989819	0.0504344	0.109003
Lsat_1_v5_gn_1_90081	0.795909	0.264961	0.651173	0.307723	0.0723166	0.174587
Lsat_1_v5_gn_9_74961	0.795843	0.176606	0.0648424	0.421128	0.680271	0.102432
Lsat_1_v5_gn_1_37441	0.795821	0.36156	0.507179	0.219006	0.127664	0.0660567
Lsat_1_v5_gn_0_10920	0.795782	0.166621	0.151632	0.436823	0.46206	0.0504669
Lactuca_sativa_newGene_7279	0.795693	0.815592	0.432701	0.0506	0.169105	0.187548
Lsat_1_v5_gn_4_141661	0.795594	0.088852	0.196601	0.598545	0.391338	0.0822172
Lsat_1_v5_gn_8_18261	0.795586	0.686899	0.780086	0.0632575	0.0503276	0.0593833
Lactuca_sativa_newGene_5732	0.795584	0.674476	0.729664	0.0661426	0.0552703	0.0529193
Lsat_1_v5_gn_8_99941	0.795577	0.676538	0.777517	0.0656449	0.0504418	0.0607805
Lsat_1_v5_gn_2_27601	0.795542	0.424484	0.771253	0.174174	0.0507861	0.154277
Lsat_1_v5_gn_4_88540	0.795527	0.435548	0.236492	0.167189	0.339534	0.0862824
Lsat_1_v5_gn_2_66720	0.79552	0.566501	0.571161	0.100935	0.0990786	0.0500161
Lsat_1_v5_gn_4_30101	0.795442	0.249824	0.131324	0.323884	0.499329	0.0741225
Lsat_1_v5_gn_8_126841	0.795423	0.242173	0.345502	0.332682	0.231438	0.0606047
Lsat_1_v5_gn_6_43520	0.795403	0.514487	0.795579	0.123812	0.05	0.123931
Lsat_1_v5_gn_3_76320	0.795293	0.539639	0.180851	0.112132	0.413892	0.174223
Lsat_1_v5_gn_9_15900	0.795241	0.103099	0.589084	0.560782	0.0920965	0.327803
Lsat_1_v5_gn_1_26001	0.795193	0.300748	0.206284	0.270685	0.377454	0.0603435
Lsat_1_v5_gn_8_17860	0.795134	0.625247	0.76116	0.0797031	0.0514987	0.0676697
Lsat_1_v5_gn_8_64660	0.795052	0.154994	0.617786	0.455205	0.0820566	0.262533
Lsat_1_v5_gn_6_57180	0.794982	0.371808	0.789122	0.210294	0.0500479	0.204525
Lsat_1_v5_gn_4_138740	0.794973	0.600482	0.507276	0.0878702	0.127028	0.0564273
Lsat_1_v5_gn_3_3661	0.794948	0.67383	0.655013	0.0661038	0.0709209	0.0503054
Lactuca_sativa_newGene_6662	0.794793	0.53458	0.555718	0.114072	0.104933	0.0503261
Lsat_1_v5_gn_0_17361	0.794786	0.0645855	0.225888	0.680045	0.351511	0.135901
Lsat_1_v5_gn_8_133141	0.794784	0.472034	0.782058	0.145255	0.0502215	0.135874
Lsat_1_v5_gn_5_154760	0.794781	0.0500112	0.0683674	0.797576	0.664508	0.0692987
Lsat_1_v5_gn_4_91301	0.794766	0.101957	0.0500122	0.562925	0.791822	0.100324
Lsat_1_v5_gn_4_55080	0.794758	0.792157	0.560331	0.0500095	0.103009	0.101549
Lsat_1_v5_gn_2_70080	0.794731	0.0918203	0.167003	0.589139	0.434748	0.0675815
Lsat_1_v5_gn_5_106640	0.794699	0.600236	0.61234	0.0878263	0.0836927	0.0501135
Lsat_1_v5_gn_9_83701	0.794668	0.448345	0.741962	0.158709	0.0534484	0.121972
Lsat_1_v5_gn_8_100120	0.794644	0.725517	0.671419	0.0557333	0.0665959	0.0527739
Lsat_1_v5_gn_5_146681	0.794638	0.233092	0.58117	0.342479	0.0947401	0.154788
Lsat_1_v5_gn_9_68460	0.794626	0.558057	0.81478	0.103868	0.0506119	0.11645
Lsat_1_v5_gn_8_6481	0.794567	0.0514471	0.0738476	0.761156	0.643991	0.0634161
Lsat_1_v5_gn_8_54241	0.794555	0.476959	0.119493	0.14239	0.522405	0.205908
Lactuca_sativa_newGene_2422	0.794475	0.70921	0.737761	0.0584534	0.0539551	0.0508355
Lsat_1_v5_gn_4_135540	0.794379	0.132372	0.103626	0.495774	0.558302	0.0528397
Lsat_1_v5_gn_8_142860	0.794348	0.258628	0.0606115	0.312677	0.697839	0.171884
Lsat_1_v5_gn_7_74080	0.794299	0.187604	0.717692	0.402493	0.056929	0.311436
Lsat_1_v5_gn_3_7221	0.794286	0.633756	0.737532	0.0767393	0.0539568	0.0599565
Lsat_1_v5_gn_8_80301	0.794268	0.568657	0.643182	0.0993847	0.0739671	0.0543247
Lsat_1_v5_gn_1_88300	0.794244	0.80034	0.538077	0.0500535	0.112174	0.116025
Lsat_1_v5_gn_1_101600	0.794196	0.534719	0.776676	0.113637	0.0504132	0.10344
Lsat_1_v5_gn_8_109221	0.794162	0.470378	0.818049	0.145689	0.0508677	0.165779
Lsat_1_v5_gn_8_78840	0.794139	0.244206	0.392296	0.328685	0.194533	0.0705561
Lsat_1_v5_gn_3_97601	0.794139	0.1683	0.102655	0.431842	0.56034	0.0620868
Lsat_1_v5_gn_8_48680	0.794135	0.765676	0.543215	0.0510602	0.109859	0.0945092
Lsat_1_v5_gn_3_6160	0.794118	0.293057	0.670228	0.276822	0.0667238	0.166666
Lsat_1_v5_gn_6_50001	0.79411	0.61923	0.723914	0.0811812	0.055885	0.0597609
Lsat_1_v5_gn_4_63920	0.79408	0.40738	0.774116	0.18409	0.0505328	0.166903
Lsat_1_v5_gn_6_4840	0.794059	0.694349	0.200983	0.0612519	0.383169	0.27142
Lsat_1_v5_gn_1_52700	0.793993	0.484501	0.68577	0.137937	0.0630675	0.081863
Lsat_1_v5_gn_4_53760	0.793988	0.132061	0.319468	0.495838	0.252114	0.101062
Lsat_1_v5_gn_9_20900	0.793982	0.790364	0.609255	0.0500183	0.0844009	0.0827941
Lsat_1_v5_gn_1_3881	0.793972	0.0943006	0.342337	0.581422	0.232501	0.155387
Lsat_1_v5_gn_9_35161	0.793971	0.137301	0.366094	0.485679	0.213618	0.118521
Lsat_1_v5_gn_4_157020	0.793965	0.0817068	0.486341	0.617407	0.136948	0.289496
Lsat_1_v5_gn_3_31320	0.793958	0.791265	0.620116	0.0500101	0.0808323	0.0796983
Lsat_1_v5_gn_8_33880	0.793901	0.764676	0.641692	0.0511145	0.0742566	0.0648458
Lsat_1_v5_gn_8_114280	0.793899	0.455114	0.120645	0.154115	0.519031	0.189197
Lsat_1_v5_gn_4_65340	0.793895	0.446782	0.814702	0.159	0.0506506	0.177423
Lsat_1_v5_gn_7_55820	0.7938	0.395379	0.767079	0.19205	0.050937	0.168825
Lsat_1_v5_gn_7_97260	0.793775	0.477748	0.826109	0.141374	0.0516322	0.168806
Lsat_1_v5_gn_6_26100	0.793732	0.432017	0.797474	0.167842	0.0500199	0.171088
Lsat_1_v5_gn_1_130281	0.793729	0.475804	0.570273	0.14239	0.0984552	0.0565054
Lsat_1_v5_gn_8_73481	0.793644	0.343188	0.208856	0.231452	0.371946	0.0694055
Lsat_1_v5_gn_5_132980	0.79361	0.099415	0.294397	0.567673	0.274931	0.120144
Lsat_1_v5_gn_9_74581	0.793483	0.701527	0.581054	0.059674	0.094187	0.0621286
Lsat_1_v5_gn_5_131021	0.793406	0.309104	0.615132	0.260832	0.0822021	0.124366
Lsat_1_v5_gn_6_64760	0.793368	0.132579	0.291197	0.493953	0.277758	0.0887281
Lsat_1_v5_gn_1_76041	0.793354	0.757023	0.324497	0.0516888	0.246982	0.21067
Lsat_1_v5_gn_4_57061	0.793318	0.465094	0.823096	0.147974	0.0513681	0.173802
Lsat_1_v5_gn_2_59260	0.793264	0.426593	0.110857	0.170838	0.539711	0.184421
Lsat_1_v5_gn_2_130620	0.793264	0.768639	0.336841	0.0507977	0.23632	0.211656
Lsat_1_v5_gn_7_46921	0.793234	0.665508	0.760515	0.0676142	0.0513806	0.0590566
Lsat_1_v5_gn_5_55261	0.793119	0.803175	0.499481	0.0501462	0.129609	0.136907
Lsat_1_v5_gn_9_70560	0.793089	0.60581	0.73575	0.0851563	0.0540109	0.0651353
Lsat_1_v5_gn_4_150721	0.79306	0.421963	0.217862	0.173606	0.359403	0.0900639
Lsat_1_v5_gn_9_113420	0.793051	0.427369	0.685416	0.170165	0.0628878	0.102191
Lsat_1_v5_gn_5_100040	0.792995	0.662097	0.493701	0.0683992	0.132442	0.0718515
Lsat_1_v5_gn_6_117861	0.792989	0.0855265	0.177255	0.604584	0.416216	0.0764526
Lsat_1_v5_gn_4_172320	0.792898	0.279244	0.0586887	0.28912	0.706029	0.195711
Lsat_1_v5_gn_8_19860	0.792865	0.396615	0.48688	0.190315	0.135864	0.0560516
Lsat_1_v5_gn_2_92701	0.79277	0.120345	0.593686	0.518094	0.089214	0.297096
Lsat_1_v5_gn_2_94701	0.792744	0.743709	0.752563	0.0529806	0.0520412	0.0500882
Lsat_1_v5_gn_5_14080	0.792705	0.528734	0.741282	0.115395	0.0532604	0.0886944
Lsat_1_v5_gn_2_82541	0.792663	0.603297	0.136218	0.0858152	0.48592	0.278275
Lsat_1_v5_gn_8_100381	0.79266	0.0999431	0.450373	0.565034	0.155875	0.219445
Lsat_1_v5_gn_8_63180	0.792654	0.433702	0.82692	0.16588	0.0518322	0.198534
Lsat_1_v5_gn_5_140720	0.792569	0.65838	0.793774	0.0692157	0.050002	0.0696199
Lsat_1_v5_gn_5_23200	0.792548	0.349458	0.784111	0.225207	0.0500973	0.216659
Lsat_1_v5_gn_8_49161	0.792523	0.493816	0.767428	0.132048	0.0508242	0.115789
Lsat_1_v5_gn_9_38960	0.792517	0.724754	0.759671	0.0554701	0.0513858	0.0513428
Lsat_1_v5_gn_9_50520	0.79248	0.523975	0.202693	0.117424	0.378719	0.145753
Lactuca_sativa_newGene_4599	0.792378	0.162294	0.0682204	0.439194	0.662012	0.0881315
Lsat_1_v5_gn_5_154320	0.792321	0.257664	0.731806	0.311234	0.0544223	0.24589
Lsat_1_v5_gn_9_121260	0.792307	0.122255	0.297948	0.513409	0.270018	0.0992756
Lsat_1_v5_gn_4_26380	0.792276	0.162665	0.063471	0.438441	0.681811	0.0962464
Lsat_1_v5_gn_6_51360	0.792269	0.745806	0.669103	0.0526849	0.0664261	0.0557636
Lsat_1_v5_gn_6_31920	0.792169	0.635685	0.769997	0.0753411	0.0506469	0.0677739
Lsat_1_v5_gn_4_48140	0.792142	0.407437	0.65759	0.182289	0.0692782	0.0981331
Lsat_1_v5_gn_9_69440	0.79208	0.494609	0.46298	0.131333	0.148195	0.0507236
Lsat_1_v5_gn_1_27801	0.792054	0.68828	0.769071	0.0620051	0.0506933	0.0568939
Lsat_1_v5_gn_8_152321	0.792031	0.137835	0.392552	0.48196	0.192364	0.131495
Lsat_1_v5_gn_6_31460	0.791876	0.175149	0.68589	0.417947	0.0624688	0.296289
Lsat_1_v5_gn_5_10340	0.791851	0.637181	0.675934	0.0747843	0.0646839	0.0512744
Lsat_1_v5_gn_4_13761	0.791782	0.505232	0.780624	0.125845	0.0501682	0.118578
Lsat_1_v5_gn_4_84821	0.791725	0.0613684	0.0521188	0.690916	0.750641	0.0536401
Lsat_1_v5_gn_3_46341	0.791706	0.721618	0.74844	0.055804	0.0523381	0.0507694
Lsat_1_v5_gn_2_10641	0.791631	0.283757	0.6951	0.283074	0.0604943	0.191496
Lsat_1_v5_gn_2_120280	0.791364	0.393528	0.716871	0.191059	0.0564918	0.134751
Lsat_1_v5_gn_7_24160	0.791361	0.29946	0.702888	0.267502	0.0589277	0.185245
Lactuca_sativa_newGene_781	0.791199	0.560996	0.722842	0.100752	0.0555267	0.0722378
Lsat_1_v5_gn_8_139140	0.791197	0.716604	0.76443	0.0565032	0.0509276	0.0525077
Lsat_1_v5_gn_0_18100	0.791186	0.426299	0.738365	0.169234	0.053405	0.130741
Lsat_1_v5_gn_2_71200	0.79115	0.638453	0.112956	0.0741543	0.532014	0.353708
Lsat_1_v5_gn_1_125781	0.791102	0.735645	0.776442	0.0537313	0.0502867	0.0519459
Lsat_1_v5_gn_5_10060	0.791084	0.11424	0.57496	0.529048	0.0952499	0.292074
Lsat_1_v5_gn_6_84940	0.791058	0.609737	0.803862	0.0829393	0.0502362	0.0889145
Lsat_1_v5_gn_8_55141	0.791055	0.222964	0.743621	0.350335	0.0527761	0.294786
Lsat_1_v5_gn_7_102740	0.791048	0.52675	0.378757	0.115253	0.20128	0.0663622
Lsat_1_v5_gn_4_157340	0.790968	0.266854	0.612319	0.299672	0.0820582	0.148737
Lsat_1_v5_gn_1_8361	0.790965	0.660983	0.4102	0.068025	0.179399	0.0984608
Lactuca_sativa_newGene_2906	0.790945	0.237854	0.665769	0.33208	0.06683	0.208117
Lsat_1_v5_gn_8_20061	0.790916	0.391495	0.622804	0.19206	0.0787183	0.0905384
Lsat_1_v5_gn_8_157680	0.790877	0.202373	0.671885	0.377035	0.0653425	0.249466
Lactuca_sativa_newGene_5076	0.790861	0.569693	0.655651	0.0971494	0.0693554	0.0558226
Lsat_1_v5_gn_2_64261	0.790848	0.336645	0.667315	0.233916	0.066424	0.136979
Lsat_1_v5_gn_5_137421	0.790844	0.225888	0.649419	0.346422	0.0709984	0.20674
Lsat_1_v5_gn_1_3320	0.79078	0.0584644	0.0739097	0.704708	0.638828	0.0538314
Lsat_1_v5_gn_7_27300	0.790774	0.308084	0.814257	0.258811	0.05082	0.286743
Lsat_1_v5_gn_1_77821	0.790771	0.530072	0.330249	0.113588	0.239223	0.0809314
Lsat_1_v5_gn_7_8200	0.790762	0.358125	0.665351	0.216529	0.0668756	0.124194
Lsat_1_v5_gn_7_85360	0.790646	0.777606	0.299812	0.0502272	0.266357	0.252036
Lsat_1_v5_gn_4_38841	0.790612	0.712131	0.704205	0.0571287	0.0585191	0.0500611
Lsat_1_v5_gn_2_111881	0.790588	0.224603	0.175441	0.347688	0.415746	0.0536817
Lsat_1_v5_gn_4_106880	0.790564	0.0660417	0.0585372	0.668544	0.704048	0.0511506
Lsat_1_v5_gn_7_8261	0.790528	0.818504	0.489824	0.0511792	0.13267	0.154657
Lsat_1_v5_gn_8_85260	0.790495	0.814469	0.465911	0.0508546	0.145345	0.165241
Lsat_1_v5_gn_5_30281	0.790475	0.657248	0.69073	0.0688161	0.0610917	0.0509906
Lsat_1_v5_gn_4_55901	0.790452	0.494272	0.790658	0.130362	0.0500001	0.130506
Lsat_1_v5_gn_3_13301	0.790433	0.150238	0.579327	0.457083	0.0932787	0.237749
Lsat_1_v5_gn_0_34000	0.790384	0.211959	0.413203	0.363566	0.176914	0.0897864
Lsat_1_v5_gn_5_33201	0.790321	0.395714	0.688288	0.188581	0.0615559	0.117565
Lsat_1_v5_gn_7_80501	0.79031	0.479571	0.806331	0.137836	0.0503717	0.150224
Lsat_1_v5_gn_4_63061	0.790261	0.110662	0.0828638	0.536	0.608905	0.0539787
Lsat_1_v5_gn_3_20620	0.790228	0.669064	0.688561	0.0658165	0.0614755	0.0503397
Lsat_1_v5_gn_2_93920	0.790223	0.214487	0.424519	0.360063	0.169529	0.0926426
Lsat_1_v5_gn_1_56301	0.790209	0.0500001	0.0634723	0.789904	0.679233	0.0633882
Lsat_1_v5_gn_7_103000	0.790169	0.356718	0.793095	0.217028	0.0500119	0.219999
Lsat_1_v5_gn_9_11781	0.790116	0.227367	0.152682	0.343667	0.452369	0.0592381
Lsat_1_v5_gn_4_71481	0.790103	0.786077	0.69515	0.0500221	0.0601158	0.0591845
Lsat_1_v5_gn_4_33580	0.790056	0.644021	0.785603	0.0721916	0.050027	0.0706438
Lsat_1_v5_gn_3_24581	0.790036	0.730535	0.715771	0.0542388	0.0564169	0.0502229
Lsat_1_v5_gn_7_106001	0.789958	0.193933	0.117158	0.387556	0.521058	0.0632487
Lactuca_sativa_newGene_3404	0.78994	0.361793	0.540608	0.212875	0.10848	0.0741471
Lsat_1_v5_gn_8_26440	0.789913	0.180392	0.0565643	0.40728	0.714715	0.12632
Lsat_1_v5_gn_1_8940	0.789901	0.337487	0.7364	0.23222	0.0534673	0.183311
Lsat_1_v5_gn_9_88540	0.789843	0.696309	0.763068	0.0598287	0.0509216	0.054706
Lsat_1_v5_gn_1_49720	0.789724	0.191577	0.0556741	0.390599	0.720149	0.138367
Lsat_1_v5_gn_5_47620	0.789722	0.205427	0.668776	0.371378	0.0657339	0.243356
Lsat_1_v5_gn_2_94520	0.789684	0.36534	0.386292	0.209918	0.19457	0.0503506
Lsat_1_v5_gn_1_117141	0.789627	0.0556074	0.0504876	0.720476	0.770319	0.0527797
Lsat_1_v5_gn_2_31000	0.78962	0.75259	0.606714	0.0517192	0.0833025	0.0696553
Lactuca_sativa_newGene_549	0.789529	0.102126	0.327917	0.555297	0.239886	0.135526
Lsat_1_v5_gn_4_41841	0.789299	0.0572007	0.327062	0.710147	0.240373	0.242932
Lsat_1_v5_gn_4_21060	0.789262	0.0859374	0.0976373	0.59837	0.566252	0.0507764
Lsat_1_v5_gn_7_51040	0.789108	0.605562	0.347602	0.0834575	0.223155	0.10122
Lsat_1_v5_gn_2_65401	0.789102	0.270635	0.0666362	0.29347	0.664235	0.162403
Lsat_1_v5_gn_4_20261	0.789061	0.739832	0.490199	0.0529504	0.131448	0.102402
Lsat_1_v5_gn_7_9261	0.789043	0.474377	0.783856	0.139665	0.0500364	0.135921
Lsat_1_v5_gn_8_54660	0.788986	0.676578	0.692935	0.0637251	0.0602844	0.0502428
Lsat_1_v5_gn_8_147781	0.788966	0.765275	0.673088	0.0507237	0.0645084	0.0587031
Lsat_1_v5_gn_6_96340	0.788947	0.0879249	0.163803	0.592185	0.43202	0.0689541
Lsat_1_v5_gn_1_104941	0.788918	0.170953	0.537827	0.420494	0.10907	0.183064
Lsat_1_v5_gn_1_89100	0.788909	0.348974	0.774073	0.221856	0.05029	0.207361
Lactuca_sativa_newGene_1483	0.788837	0.514909	0.730935	0.119285	0.0540048	0.0891143
Lsat_1_v5_gn_1_84721	0.788786	0.175405	0.454451	0.413371	0.150448	0.130669
Lsat_1_v5_gn_3_116821	0.788757	0.676801	0.717291	0.0636118	0.0559398	0.0515441
Lsat_1_v5_gn_4_160741	0.788696	0.163854	0.476171	0.431597	0.138457	0.15244
Lsat_1_v5_gn_9_47681	0.788672	0.519137	0.50798	0.117225	0.122443	0.0500898
Lsat_1_v5_gn_9_90540	0.78867	0.714917	0.776358	0.0562967	0.0502008	0.0542401
Lsat_1_v5_gn_4_59781	0.788646	0.0908674	0.36728	0.583494	0.207439	0.177464
Lactuca_sativa_newGene_5379	0.788646	0.663413	0.778415	0.0666961	0.0501394	0.0637493
Lsat_1_v5_gn_1_96821	0.788592	0.289372	0.375806	0.274014	0.201076	0.0565918
Lsat_1_v5_gn_5_153780	0.788588	0.2035	0.778116	0.372498	0.0501459	0.359102
Lactuca_sativa_newGene_239	0.788556	0.663964	0.769991	0.0665351	0.0504491	0.0614812
Lsat_1_v5_gn_5_45700	0.788437	0.636415	0.803806	0.0737301	0.0503376	0.0798612
Lsat_1_v5_gn_8_62941	0.788408	0.213053	0.639497	0.359579	0.0728542	0.211645
Lsat_1_v5_gn_9_11741	0.788362	0.307996	0.55594	0.256212	0.101223	0.0985556
Lsat_1_v5_gn_5_45480	0.788332	0.349816	0.789668	0.220601	0.0500024	0.221959
Lsat_1_v5_gn_4_162340	0.788254	0.731209	0.63201	0.0538835	0.0749227	0.0589843
Lsat_1_v5_gn_8_19121	0.788249	0.247992	0.515745	0.317013	0.118521	0.111544
Lsat_1_v5_gn_3_115260	0.788244	0.447374	0.750928	0.154088	0.0517329	0.127863
Lsat_1_v5_gn_7_81821	0.788197	0.104058	0.155143	0.548745	0.445498	0.0577593
Lsat_1_v5_gn_4_166580	0.788173	0.0638033	0.439098	0.675218	0.158898	0.309128
Lsat_1_v5_gn_7_6780	0.788163	0.213202	0.579452	0.359069	0.0920998	0.169804
Lsat_1_v5_gn_2_32401	0.788105	0.80702	0.63147	0.050516	0.0750227	0.0829076
Lsat_1_v5_gn_2_92421	0.788087	0.195818	0.13308	0.38243	0.485654	0.0579848
Lsat_1_v5_gn_8_144841	0.788055	0.731574	0.751184	0.0538078	0.0516919	0.0504214
Lsat_1_v5_gn_7_91560	0.788017	0.708515	0.744619	0.05722	0.0523102	0.0513522
Lsat_1_v5_gn_3_1680	0.788016	0.538631	0.308262	0.108195	0.255588	0.091953
Lactuca_sativa_newGene_765	0.787935	0.423504	0.354896	0.168222	0.216207	0.053698
Lsat_1_v5_gn_2_5001	0.787924	0.085978	0.0525233	0.596463	0.742457	0.0691614
Lsat_1_v5_gn_4_59940	0.787909	0.659505	0.680431	0.0674258	0.0625888	0.0503827
Lsat_1_v5_gn_3_17760	0.787904	0.646173	0.778549	0.0708551	0.0501163	0.0678106
Lsat_1_v5_gn_9_97361	0.787897	0.723033	0.788377	0.0549362	0.0500003	0.0550156
Lactuca_sativa_newGene_1382	0.787804	0.666259	0.795573	0.0657592	0.0500841	0.06818
Lsat_1_v5_gn_5_172221	0.787766	0.620637	0.802889	0.0781105	0.0503254	0.0846442
Lsat_1_v5_gn_1_58621	0.787749	0.290707	0.774034	0.271758	0.050247	0.256672
Lsat_1_v5_gn_4_124200	0.7877	0.275253	0.229858	0.287058	0.337569	0.0523594
Lsat_1_v5_gn_6_39681	0.787651	0.550767	0.631745	0.102924	0.0747726	0.0550148
Lsat_1_v5_gn_7_93780	0.787624	0.339468	0.0508552	0.228219	0.761714	0.308528
Lsat_1_v5_gn_6_11341	0.787572	0.647606	0.697325	0.0703612	0.0591141	0.0521802
Lactuca_sativa_newGene_3190	0.787563	0.628942	0.721888	0.0755527	0.0550448	0.057745
Lsat_1_v5_gn_4_85000	0.787531	0.0721122	0.0782324	0.641051	0.619929	0.0503591
Lsat_1_v5_gn_8_16621	0.787364	0.735323	0.550687	0.0532518	0.102797	0.0792928
Lsat_1_v5_gn_4_55060	0.787347	0.0779499	0.188901	0.620615	0.391299	0.0898065
Lactuca_sativa_newGene_3484	0.787321	0.553768	0.706425	0.101526	0.0574346	0.0692628
Lsat_1_v5_gn_8_72401	0.787286	0.673191	0.291269	0.0640107	0.27069	0.169953
Lsat_1_v5_gn_0_11561	0.787282	0.668357	0.736257	0.0651142	0.0531314	0.0544339
Lsat_1_v5_gn_7_30960	0.78724	0.672001	0.249598	0.0642665	0.313972	0.202346
Lsat_1_v5_gn_2_118460	0.787236	0.516322	0.7958	0.117612	0.050102	0.123198
Lsat_1_v5_gn_6_28160	0.787233	0.196085	0.0578353	0.380934	0.703999	0.133786
Lsat_1_v5_gn_8_13101	0.78723	0.621843	0.8202	0.077532	0.0516315	0.0929943
Lsat_1_v5_gn_4_92901	0.787223	0.392508	0.698746	0.187953	0.0587736	0.124743
Lsat_1_v5_gn_7_21481	0.787215	0.562325	0.541982	0.0980821	0.106312	0.0503033
Lsat_1_v5_gn_8_33061	0.787184	0.686215	0.786316	0.0611918	0.050001	0.060977
Lsat_1_v5_gn_5_8840	0.787156	0.306779	0.730531	0.255993	0.0538105	0.201589
Lsat_1_v5_gn_9_119261	0.78715	0.149276	0.0505491	0.454283	0.766495	0.134408
Lsat_1_v5_gn_6_74981	0.787143	0.506443	0.549882	0.122173	0.103002	0.0513683
Lsat_1_v5_gn_9_109860	0.787115	0.427883	0.454526	0.164819	0.149112	0.0505235
Lsat_1_v5_gn_2_48500	0.787046	0.374298	0.280966	0.200703	0.280526	0.057798
Lsat_1_v5_gn_9_80320	0.787009	0.65152	0.75445	0.0691524	0.0513255	0.0603134
Lsat_1_v5_gn_5_103860	0.786993	0.179688	0.0591392	0.404434	0.696494	0.117701
Lactuca_sativa_newGene_2495	0.786988	0.58753	0.770344	0.0886356	0.0503597	0.0813643
Lsat_1_v5_gn_7_86941	0.786968	0.272202	0.79645	0.289333	0.0501252	0.300689
Lsat_1_v5_gn_3_83381	0.78696	0.570647	0.797211	0.0947649	0.0501467	0.100215
Lsat_1_v5_gn_8_27280	0.786934	0.0829205	0.54762	0.60431	0.103811	0.340483
Lsat_1_v5_gn_5_36660	0.7868	0.64199	0.442788	0.0715998	0.155616	0.0800339
Lsat_1_v5_gn_4_49061	0.786799	0.456799	0.786641	0.147592	0.05	0.147472
Lsat_1_v5_gn_7_93760	0.786728	0.242252	0.0557565	0.321702	0.716115	0.178875
Lsat_1_v5_gn_5_168160	0.786697	0.306447	0.813226	0.255793	0.0510309	0.287024
Lactuca_sativa_newGene_4515	0.786686	0.569412	0.815073	0.095091	0.0511873	0.11151
Lsat_1_v5_gn_9_6521	0.786659	0.69884	0.707459	0.058633	0.0571275	0.0500711
Lactuca_sativa_newGene_5372	0.786631	0.384028	0.684195	0.193326	0.0614671	0.121087
Lsat_1_v5_gn_3_47940	0.786545	0.068591	0.0784536	0.653127	0.617913	0.0510081
Lsat_1_v5_gn_9_64361	0.786543	0.685339	0.780955	0.0612108	0.0500416	0.0598745
Lsat_1_v5_gn_2_35801	0.786513	0.46205	0.0533716	0.144463	0.733357	0.394933
Lsat_1_v5_gn_2_66440	0.786505	0.39567	0.809979	0.185138	0.0507985	0.207854
Lsat_1_v5_gn_8_151441	0.786394	0.445193	0.700677	0.153893	0.0582451	0.101895
Lsat_1_v5_gn_5_175680	0.786343	0.309116	0.0660647	0.252981	0.663141	0.192754
Lsat_1_v5_gn_1_17080	0.786249	0.720726	0.764004	0.0549937	0.0506315	0.0520671
Lsat_1_v5_gn_4_25401	0.786245	0.211734	0.404179	0.358518	0.179199	0.0867281
Lsat_1_v5_gn_2_24640	0.786241	0.494835	0.60438	0.127195	0.082598	0.0588822
Lsat_1_v5_gn_8_140561	0.786221	0.654557	0.753097	0.0681266	0.0513649	0.0594638
Lsat_1_v5_gn_5_54420	0.786165	0.792909	0.615287	0.0500626	0.0791078	0.0819359
Lsat_1_v5_gn_7_96181	0.786139	0.289178	0.788401	0.271412	0.050007	0.273985
Lsat_1_v5_gn_8_166540	0.786123	0.641518	0.201913	0.0714923	0.371448	0.224714
Lactuca_sativa_newGene_6202	0.786114	0.36654	0.162495	0.205539	0.430333	0.0995866
Lsat_1_v5_gn_7_55861	0.78605	0.612685	0.62352	0.0798696	0.0765687	0.0500925
Lsat_1_v5_gn_7_49061	0.786029	0.547575	0.785934	0.103325	0.05	0.103272
Lsat_1_v5_gn_6_38661	0.786025	0.345714	0.630606	0.221536	0.0744939	0.113093
Lsat_1_v5_gn_4_109201	0.785999	0.418352	0.793012	0.169825	0.0500676	0.175887
Lsat_1_v5_gn_6_33820	0.785931	0.130965	0.519915	0.486856	0.11516	0.219822
Lsat_1_v5_gn_5_10240	0.785925	0.188286	0.0728434	0.390314	0.636332	0.096188
Lsat_1_v5_gn_8_133561	0.785814	0.699762	0.767397	0.0582848	0.0504359	0.0549035
Lsat_1_v5_gn_8_155641	0.785779	0.388406	0.826523	0.189476	0.0525353	0.231708
Lsat_1_v5_gn_8_142140	0.785752	0.773266	0.445592	0.0502033	0.153158	0.143773
Lsat_1_v5_gn_2_51320	0.785701	0.0851597	0.225138	0.595919	0.34083	0.10019
Lsat_1_v5_gn_1_53221	0.785691	0.0993696	0.187935	0.556973	0.390515	0.0705962
Lsat_1_v5_gn_7_48300	0.785613	0.576266	0.768715	0.0920098	0.050368	0.0843164
Lsat_1_v5_gn_8_58281	0.785599	0.738464	0.733014	0.0526728	0.0532895	0.0500318
Lsat_1_v5_gn_5_172860	0.785564	0.489955	0.660222	0.129155	0.0665297	0.0722885
Lsat_1_v5_gn_1_71501	0.785521	0.527826	0.74238	0.111393	0.0522573	0.0894758
Lsat_1_v5_gn_1_1740	0.785494	0.279237	0.230126	0.280471	0.334486	0.0527382
Lsat_1_v5_gn_9_43580	0.785482	0.162039	0.0511109	0.430233	0.755658	0.139853
Lsat_1_v5_gn_3_105260	0.785445	0.694796	0.690246	0.0591091	0.0599716	0.0500192
Lsat_1_v5_gn_9_47361	0.785408	0.620205	0.807793	0.0773081	0.0507189	0.0871377
Lsat_1_v5_gn_5_191360	0.785406	0.734355	0.764831	0.0531074	0.0505401	0.051054
Lsat_1_v5_gn_9_48840	0.78539	0.474056	0.0824043	0.137183	0.603853	0.277213
Lsat_1_v5_gn_1_70140	0.785365	0.638804	0.751467	0.0719653	0.051421	0.0621005
Lsat_1_v5_gn_8_130461	0.785348	0.0850446	0.29374	0.595794	0.266142	0.139865
Lsat_1_v5_gn_3_9900	0.785333	0.737078	0.673549	0.0527914	0.0633934	0.0539144
Lsat_1_v5_gn_9_2221	0.785319	0.427667	0.573973	0.163469	0.0927057	0.0657393
Lsat_1_v5_gn_3_45161	0.785254	0.648946	0.746723	0.0692406	0.0518163	0.0591426
Lsat_1_v5_gn_3_23500	0.785131	0.223375	0.550212	0.342296	0.101761	0.144428
Lsat_1_v5_gn_2_25400	0.784987	0.373573	0.0580292	0.199285	0.70022	0.279048
Lsat_1_v5_gn_3_89301	0.784907	0.178561	0.388399	0.403369	0.188687	0.098438
Lsat_1_v5_gn_7_15900	0.784879	0.682655	0.462213	0.0613444	0.143156	0.0879936
Lsat_1_v5_gn_7_60060	0.78485	0.718905	0.587998	0.0550232	0.0874765	0.0647431
Lsat_1_v5_gn_4_41921	0.78483	0.684293	0.701884	0.0609999	0.0577071	0.0502875
Lsat_1_v5_gn_1_89581	0.784808	0.101442	0.256169	0.550566	0.303774	0.0983229
Lsat_1_v5_gn_4_17160	0.784767	0.470529	0.179734	0.138599	0.401414	0.135461
Lactuca_sativa_newGene_4329	0.784765	0.647863	0.61428	0.0693597	0.0788528	0.0509094
Lsat_1_v5_gn_4_178600	0.784721	0.164881	0.162149	0.424566	0.42903	0.0500149
Lsat_1_v5_gn_1_4221	0.784668	0.595179	0.737185	0.0849482	0.0526988	0.0679507
Lsat_1_v5_gn_9_37081	0.784663	0.115108	0.193952	0.518299	0.380573	0.0641612
Lsat_1_v5_gn_3_121560	0.784637	0.781005	0.730403	0.0500175	0.0534723	0.0529955
Lsat_1_v5_gn_3_109100	0.784607	0.237691	0.679153	0.324397	0.0619998	0.218918
Lsat_1_v5_gn_7_84100	0.784564	0.671481	0.677522	0.0636399	0.0623321	0.0500322
Lsat_1_v5_gn_3_72480	0.784537	0.120275	0.0665825	0.506896	0.658713	0.0677591
Lsat_1_v5_gn_3_61961	0.784535	0.510517	0.702285	0.118586	0.0575779	0.0796558
Lsat_1_v5_gn_8_90261	0.784526	0.0668452	0.148832	0.657613	0.451506	0.0824981
Lsat_1_v5_gn_4_125340	0.784504	0.653632	0.807907	0.0678159	0.0507841	0.0762328
Lsat_1_v5_gn_8_144861	0.784478	0.766172	0.747939	0.0504279	0.0516344	0.0503892
Lsat_1_v5_gn_3_54560	0.784446	0.129289	0.0522007	0.488163	0.741761	0.104192
Lsat_1_v5_gn_3_31441	0.784442	0.760597	0.70504	0.0507163	0.0570945	0.053289
Lsat_1_v5_gn_1_124800	0.784369	0.637504	0.611292	0.0719718	0.0796168	0.0505474
Lactuca_sativa_newGene_5190	0.784325	0.511535	0.799471	0.117984	0.05032	0.128063
Lsat_1_v5_gn_4_140101	0.784242	0.101847	0.051379	0.548796	0.750775	0.0858853
Lsat_1_v5_gn_4_94840	0.78422	0.540351	0.59786	0.105292	0.0838596	0.0524631
Lsat_1_v5_gn_9_32321	0.784197	0.57058	0.82012	0.0934021	0.0519196	0.114353
Lactuca_sativa_newGene_5872	0.784189	0.713771	0.649283	0.0556642	0.0688093	0.0537639
Lsat_1_v5_gn_3_33541	0.784112	0.138643	0.428598	0.469555	0.161916	0.150511
Lsat_1_v5_gn_8_29501	0.78409	0.445812	0.0798535	0.151738	0.610165	0.260699
Lsat_1_v5_gn_2_122641	0.784079	0.211786	0.277644	0.355691	0.280449	0.0551764
Lsat_1_v5_gn_6_33020	0.784075	0.413006	0.76163	0.171589	0.0506356	0.153816
Lsat_1_v5_gn_8_67081	0.78407	0.347	0.376607	0.218554	0.196235	0.0507186
Lsat_1_v5_gn_6_79821	0.784067	0.584519	0.657211	0.0883237	0.066803	0.054208
Lactuca_sativa_newGene_1314	0.784009	0.683368	0.785312	0.060985	0.0500023	0.0613064
Lsat_1_v5_gn_3_10401	0.783978	0.461692	0.812127	0.142774	0.0511477	0.1657
Lsat_1_v5_gn_5_125561	0.783969	0.0715795	0.0645535	0.638439	0.666672	0.05067
Lsat_1_v5_gn_4_71501	0.783907	0.484735	0.82919	0.130641	0.0531441	0.167468
Lsat_1_v5_gn_9_4400	0.78384	0.143641	0.161979	0.459916	0.42813	0.0507437
Lactuca_sativa_newGene_2319	0.783807	0.219088	0.629775	0.345996	0.0739158	0.198565
Lsat_1_v5_gn_1_112341	0.783804	0.703894	0.799081	0.05716	0.0503247	0.0605625
Lsat_1_v5_gn_9_11721	0.783802	0.208087	0.685318	0.360187	0.0605463	0.254885
Lactuca_sativa_newGene_3206	0.783773	0.702064	0.772851	0.0574618	0.0501546	0.0554582
Lsat_1_v5_gn_5_121700	0.783762	0.559979	0.804068	0.0971852	0.0505822	0.108661
Lsat_1_v5_gn_5_162440	0.783685	0.383303	0.797727	0.191128	0.0502732	0.204483
Lsat_1_v5_gn_4_27681	0.783642	0.667995	0.293192	0.064163	0.264765	0.165078
Lsat_1_v5_gn_5_104540	0.783595	0.746364	0.779265	0.0516872	0.0500247	0.0513033
Lsat_1_v5_gn_4_143700	0.783584	0.361659	0.807125	0.206766	0.0507895	0.230958
Lactuca_sativa_newGene_4258	0.783568	0.0580335	0.0720862	0.698509	0.636058	0.0534033
Lactuca_sativa_newGene_4922	0.78356	0.647401	0.176276	0.0690862	0.405068	0.259498
Lsat_1_v5_gn_2_64281	0.783524	0.0622884	0.0500253	0.676454	0.779142	0.0611886
Lsat_1_v5_gn_3_54600	0.783514	0.249078	0.108967	0.310054	0.530695	0.0884511
Lsat_1_v5_gn_8_12301	0.783459	0.534097	0.535805	0.107484	0.106762	0.0500021
Lsat_1_v5_gn_8_73460	0.783361	0.34436	0.8086	0.219945	0.050911	0.246955
Lsat_1_v5_gn_2_68540	0.783295	0.722955	0.484154	0.0542217	0.130515	0.0967898
Lsat_1_v5_gn_4_123261	0.783281	0.0682645	0.0864209	0.650292	0.588986	0.0529817
Lsat_1_v5_gn_2_102120	0.783227	0.720031	0.766469	0.0546044	0.0503576	0.05239
Lsat_1_v5_gn_3_55881	0.783224	0.0520856	0.0764217	0.741599	0.620344	0.0634975
Lsat_1_v5_gn_9_39781	0.78322	0.428973	0.285358	0.160966	0.271834	0.0675044
Lsat_1_v5_gn_7_115500	0.783174	0.514191	0.74341	0.116052	0.0519105	0.0948326
Lactuca_sativa_newGene_2508	0.783164	0.395421	0.820899	0.182331	0.0521175	0.21982
Lsat_1_v5_gn_6_17640	0.783149	0.262406	0.240517	0.295109	0.319335	0.0505491
Lsat_1_v5_gn_8_25621	0.783091	0.448408	0.808685	0.149489	0.0509364	0.170799
Lsat_1_v5_gn_9_85720	0.783066	0.740255	0.543199	0.052199	0.103473	0.0834708
Lactuca_sativa_newGene_5327	0.783024	0.187771	0.384075	0.387264	0.189987	0.0915167
Lsat_1_v5_gn_4_26220	0.782976	0.758377	0.484292	0.0507555	0.130228	0.114815
Lsat_1_v5_gn_8_47261	0.782938	0.278312	0.701611	0.278476	0.0573716	0.200996
Lactuca_sativa_newGene_7059	0.782925	0.728772	0.407257	0.0534359	0.174307	0.134742
Lsat_1_v5_gn_5_118860	0.782866	0.780181	0.650467	0.0500095	0.06809	0.0672586
Lsat_1_v5_gn_7_18201	0.782855	0.137047	0.0503961	0.470871	0.765183	0.125203
Lsat_1_v5_gn_2_117121	0.782788	0.653527	0.717781	0.067309	0.0548462	0.0537786
Lsat_1_v5_gn_1_47980	0.782785	0.476657	0.826128	0.133985	0.0528409	0.169499
Lsat_1_v5_gn_2_97741	0.782773	0.185148	0.257986	0.390755	0.299396	0.0571573
Lsat_1_v5_gn_2_72380	0.78276	0.455936	0.445868	0.145028	0.150681	0.0500742
Lsat_1_v5_gn_5_174381	0.782753	0.673111	0.805904	0.0627989	0.0507589	0.0698943
Lsat_1_v5_gn_9_46261	0.78275	0.11326	0.138964	0.519828	0.467105	0.0520086
Lsat_1_v5_gn_3_25621	0.782745	0.0504282	0.118913	0.76435	0.50738	0.108081
Lsat_1_v5_gn_5_182240	0.782736	0.0608569	0.0727882	0.682462	0.632434	0.0521308
Lsat_1_v5_gn_5_69300	0.782716	0.417474	0.749205	0.167626	0.0513724	0.142466
Lsat_1_v5_gn_5_33400	0.782686	0.603416	0.684619	0.0814019	0.0604181	0.0554858
Lsat_1_v5_gn_6_104420	0.782656	0.307619	0.119432	0.250344	0.506145	0.106167
Lsat_1_v5_gn_2_1100	0.782643	0.708956	0.750448	0.0561254	0.05127	0.0518082
Lactuca_sativa_newGene_6591	0.782642	0.651144	0.174111	0.0678512	0.407186	0.265552
Lsat_1_v5_gn_8_18160	0.782603	0.799055	0.651863	0.0503754	0.0676609	0.0732833
Lsat_1_v5_gn_6_48860	0.782571	0.675213	0.797726	0.0623043	0.0503172	0.0666282
Lsat_1_v5_gn_8_63481	0.78257	0.51208	0.547416	0.11664	0.101494	0.0509054
Lsat_1_v5_gn_3_25440	0.782421	0.449729	0.758393	0.148234	0.0507198	0.131411
Lsat_1_v5_gn_4_123620	0.782404	0.711565	0.679842	0.0556842	0.0613037	0.0509431
Lsat_1_v5_gn_8_36401	0.782394	0.311768	0.711439	0.246354	0.0557014	0.182542
Lsat_1_v5_gn_3_76420	0.782334	0.54768	0.805156	0.101261	0.050735	0.114786
Lsat_1_v5_gn_2_85980	0.782306	0.270509	0.754897	0.285667	0.0509289	0.256049
Lsat_1_v5_gn_6_45461	0.782301	0.731558	0.752644	0.0530289	0.051082	0.0504887
Lactuca_sativa_newGene_4309	0.782298	0.676856	0.729875	0.0618907	0.053222	0.0527041
Lsat_1_v5_gn_3_131960	0.782242	0.689053	0.779088	0.0594638	0.050013	0.0587687
Lsat_1_v5_gn_3_79320	0.782116	0.159561	0.246802	0.429833	0.31093	0.0615932
Lsat_1_v5_gn_1_113040	0.782111	0.503496	0.161721	0.120325	0.426247	0.170842
Lsat_1_v5_gn_8_141500	0.782101	0.445076	0.782101	0.150628	0.05	0.150628
Lsat_1_v5_gn_9_82540	0.782099	0.726162	0.673524	0.0536398	0.0625395	0.0526365
Lsat_1_v5_gn_7_45180	0.782019	0.79601	0.707631	0.0502686	0.0562186	0.0590928
Lsat_1_v5_gn_9_108920	0.782009	0.235419	0.195746	0.323891	0.374631	0.0521704
Lsat_1_v5_gn_9_2400	0.781899	0.271227	0.701245	0.284464	0.0572275	0.206661
Lactuca_sativa_newGene_592	0.78188	0.713105	0.776598	0.055366	0.0500363	0.0545158
Lsat_1_v5_gn_2_90740	0.781827	0.23543	0.785455	0.323655	0.0500175	0.3281
Lsat_1_v5_gn_1_3221	0.781796	0.620935	0.751125	0.0757072	0.0511518	0.0658361
Lactuca_sativa_newGene_1854	0.781786	0.631382	0.308806	0.0727427	0.248346	0.133023
Lsat_1_v5_gn_3_44541	0.781764	0.768598	0.728125	0.050221	0.053357	0.0518523
Lsat_1_v5_gn_6_96620	0.781757	0.763628	0.741082	0.0504141	0.051982	0.0505832
Lsat_1_v5_gn_7_44381	0.781754	0.120133	0.399041	0.503423	0.17868	0.154392
Lactuca_sativa_newGene_2782	0.781725	0.101283	0.318872	0.546806	0.239426	0.13144
Lactuca_sativa_newGene_2554	0.78171	0.592844	0.756984	0.084424	0.0507584	0.0747681
Lsat_1_v5_gn_0_141	0.781649	0.627982	0.779814	0.0736395	0.0500044	0.0729857
Lsat_1_v5_gn_6_66241	0.781645	0.559783	0.622457	0.0961724	0.0752097	0.0529949
Lsat_1_v5_gn_5_36381	0.781627	0.0778822	0.0516729	0.613379	0.744382	0.0657227
Lsat_1_v5_gn_8_45561	0.781621	0.190997	0.727921	0.380817	0.0533622	0.317723
Lsat_1_v5_gn_8_11140	0.781607	0.612354	0.764423	0.0781842	0.0503727	0.0719624
Lsat_1_v5_gn_7_19080	0.781569	0.350277	0.793322	0.213523	0.0501879	0.225352
Lsat_1_v5_gn_1_61681	0.781508	0.111981	0.42045	0.521042	0.164781	0.1787
Lsat_1_v5_gn_9_35421	0.781487	0.421816	0.77635	0.163922	0.0500343	0.159806
Lsat_1_v5_gn_6_107960	0.781482	0.679581	0.804634	0.0611299	0.0507534	0.0677614
Lsat_1_v5_gn_9_81581	0.781441	0.720958	0.729467	0.0542065	0.0531577	0.0500746
Lsat_1_v5_gn_1_50041	0.781388	0.760465	0.726577	0.050547	0.0534915	0.0512713
Lsat_1_v5_gn_8_31281	0.781378	0.173352	0.253556	0.406698	0.302565	0.0591362
Lsat_1_v5_gn_3_24280	0.781368	0.422725	0.292776	0.163267	0.262649	0.0642455
Lsat_1_v5_gn_1_9840	0.781359	0.477899	0.523798	0.132359	0.110687	0.0515208
Lsat_1_v5_gn_3_60520	0.781343	0.734995	0.744631	0.0525385	0.0516252	0.050101
Lsat_1_v5_gn_6_112720	0.781307	0.519505	0.703084	0.112538	0.0568101	0.0772925
Lsat_1_v5_gn_2_106121	0.781286	0.707313	0.732139	0.0561349	0.0528375	0.0506232
Lsat_1_v5_gn_5_187101	0.781274	0.611649	0.735305	0.0782672	0.0524983	0.0637712
Lsat_1_v5_gn_9_55940	0.781271	0.739837	0.379312	0.0520488	0.191739	0.158185
Lsat_1_v5_gn_1_46861	0.78126	0.1408	0.468789	0.461669	0.13701	0.172218
Lsat_1_v5_gn_5_15061	0.781238	0.443994	0.588667	0.150586	0.0856138	0.0654075
Lsat_1_v5_gn_4_41580	0.78123	0.700006	0.677756	0.0573028	0.0614378	0.0504546
Lsat_1_v5_gn_7_108681	0.781222	0.728525	0.752097	0.0532385	0.0510394	0.0506065
Lactuca_sativa_newGene_1843	0.781208	0.832391	0.463154	0.0540318	0.139964	0.184369
Lsat_1_v5_gn_2_82280	0.78118	0.458783	0.767831	0.142303	0.0502265	0.132976
Lsat_1_v5_gn_6_110620	0.781071	0.116502	0.42036	0.510354	0.16448	0.172251
Lsat_1_v5_gn_1_94121	0.781049	0.405807	0.462558	0.173648	0.140169	0.0523949
Lsat_1_v5_gn_1_94701	0.781046	0.798336	0.585578	0.0504119	0.0865758	0.0950023
Lsat_1_v5_gn_2_106480	0.781031	0.217418	0.608841	0.344636	0.0790281	0.185366
Lsat_1_v5_gn_3_57720	0.780958	0.677608	0.524544	0.0614007	0.110129	0.0684785
Lsat_1_v5_gn_7_57600	0.780883	0.761114	0.771165	0.0504885	0.0501209	0.0501233
Lsat_1_v5_gn_7_111841	0.780859	0.759112	0.738282	0.0505882	0.0521542	0.05049
Lactuca_sativa_newGene_986	0.780833	0.498798	0.626154	0.121726	0.0738587	0.0621693
Lsat_1_v5_gn_7_53840	0.780827	0.612963	0.827449	0.077695	0.0532837	0.100747
Lsat_1_v5_gn_8_31300	0.780815	0.665765	0.75144	0.0638815	0.0510547	0.0572358
Lsat_1_v5_gn_4_124821	0.78077	0.762943	0.714614	0.0503988	0.0549653	0.0525433
Lsat_1_v5_gn_7_34821	0.780759	0.740249	0.772822	0.0519576	0.050081	0.0512414
Lsat_1_v5_gn_3_67840	0.780758	0.11909	0.138787	0.504311	0.464754	0.0511309
Lsat_1_v5_gn_4_59280	0.780706	0.686482	0.638574	0.0596008	0.070437	0.0519762
Lsat_1_v5_gn_2_69281	0.780682	0.749672	0.765211	0.0511704	0.0503019	0.0502831
Lsat_1_v5_gn_8_59160	0.780669	0.050108	0.0807272	0.771486	0.602907	0.0771153
Lsat_1_v5_gn_7_33721	0.780615	0.810351	0.665077	0.051262	0.0639795	0.0738053
Lsat_1_v5_gn_3_51501	0.780563	0.529676	0.635036	0.107701	0.0713268	0.0584437
Lsat_1_v5_gn_5_92000	0.780551	0.0692434	0.376712	0.642983	0.192924	0.235788
Lsat_1_v5_gn_5_14521	0.780546	0.61766	0.344236	0.0761926	0.217257	0.107889
Lsat_1_v5_gn_4_50521	0.780542	0.720486	0.757811	0.0541345	0.0506403	0.0515163
Lsat_1_v5_gn_8_121540	0.78053	0.652001	0.813172	0.066992	0.0515339	0.0789724
Lsat_1_v5_gn_5_76141	0.780486	0.652419	0.624656	0.0668777	0.074156	0.0506298
Lsat_1_v5_gn_7_106841	0.780485	0.803609	0.683916	0.0507473	0.0600393	0.0663403
Lsat_1_v5_gn_8_17440	0.78048	0.745371	0.683118	0.0514855	0.0601918	0.0538689
[truncated: 29,642 more rows]

## Sheet: Table S5
Table S5 Proteins interacting with LsWRKY transcription factors.
Name of LsWRKY in lettuce	STRING protein from Arabidopsis	Name of interaction proteins	Annotation of interaction proteins
LsWRKY1/41	WRKY20	SIB1(AT3G56710.1)	Sigma factor binding protein 1
LsWRKY20/56	WRKY57	SIB1(AT3G56710.1)	Sigma factor binding protein 1
		SIB2(AT2G41180.1)	Sigma factor binding protein 2
LsWRKY2/14/54/19	WRKY75	SIB1(AT3G56710.1)	Sigma factor binding protein 1
		WRKY6(AT1G62300.1)	WRKY family transcription factor
LsWRKY27/31/43/52/64	WRKY6	SIB1(AT3G56710.1)	Sigma factor binding protein 1
		WRKY54(AT2G40750.1)	Probable WRKY transcription factor 54
		WRKY70(AT3G56400.1)	Arabidopsis thaliana wrky dna-binding protein 70
		WRKY53(AT4G23810.1,)	Probable WRKY transcription factor 53
		WRKY33(AT2G38470.1)	Probable WRKY transcription factor 33
		WRKY48(AT5G49520.1)	Arabidopsis thaliana wrky dna-binding protein 48
		MPK3(AT3G45640.1)	Mitogen-activated protein kinase 3
		WRKY75(AT5G13080.1)	Arabidopsis thaliana wrky dna-binding protein 75
LsWRKY9/72	WRKY54	WRKY6(AT1G62300.1)	WRKY family transcription factor
		WRKY70(AT3G56400.1)	Arabidopsis thaliana wrky dna-binding protein 70
		WRKY46(AT2G46400.1)	Probable WRKY transcription factor 46
		WRKY40(AT1G80840.1)	Probable WRKY transcription factor 40
		WRKY18(AT4G31800.1)	Arabidopsis thaliana wrky dna-binding protein 18
LsWRKY36/38	WRKY48	WRKY6(AT1G62300.1)	WRKY family transcription factor
		WRKY33(AT2G38470.1)	Probable WRKY transcription factor 33
		WRKY46(AT2G46400.1)	Probable WRKY transcription factor 46
		WRKY40(AT1G80840.1)	Probable WRKY transcription factor 40
		WRKY18(AT4G31800.1)	Arabidopsis thaliana wrky dna-binding protein 18
LsWRKY34/27	WRKY60	WRKY70(AT3G56400.1)	Arabidopsis thaliana wrky dna-binding protein 70
		WRKY40(AT1G80840.1)	Probable WRKY transcription factor 40
		WRKY18(AT4G31800.1)	Arabidopsis thaliana wrky dna-binding protein 18
		GUN5(AT5G13630.1)	Magnesium-chelatase subunit chlh
LsWRKY29	WRKY9	WRKY14(AT1G30650.1)	Probable WRKY transcription factor 14
		WRKY7(AT4G24240.1)	Probable WRKY transcription factor 7
		WRKY65(AT1G29280.1)	Probable WRKY transcription factor 65
LsWRKY45	WRKY14	WRKY9(AT1G68150.1)	Probable WRKY transcription factor 9
LsWRKY26/44	WRKY65	WRKY7(AT4G24240.1)	Probable WRKY transcription factor 7
		WRKY9(AT1G68150.1)	Probable WRKY transcription factor 9
LsWRKY8/65/7	WRKY70	WRKY54(AT2G40750.1)	Probable WRKY transcription factor 54
		WRKY60(AT2G25000.1)	Probable WRKY transcription factor 60
		WRKY18(AT4G31800.1)	Arabidopsis thaliana wrky dna-binding protein 18
		WRKY40(AT1G80840.1)	Probable WRKY transcription factor 40
		WRKY53(AT4G23810.1)	Probable WRKY transcription factor 53
		WRKY33(AT2G38470.1)	Probable WRKY transcription factor 33
		MPK4(AT4G01370.1)	Mitogen-activated protein kinase 4
		SIB1(AT3G56710.1)	Sigma factor binding protein 1
		WRKY46(AT2G46400.1)	Probable WRKY transcription factor 46
LsWRKY14/30/31/53/65/58	WRKY33	WRKY6(AT1G62300.1)	WRKY family transcription factor
		SIB1(AT3G56710.1)	Sigma factor binding protein 1
		SIB2(AT2G41180.1)	Sigma factor binding protein 2
		MPK4(AT4G01370.1)	Mitogen-activated protein kinase 4
		MKS1(AT3G18690.1)	MAP kinase substrate 1
		MPK3(AT3G45640.1)	Mitogen-activated protein kinase 3
		WRKY22(AT4G01250.1)	Probable WRKY transcription factor 22
		ACS6(AT4G11280.1)	1-aminocyclopropane-1-carboxylic acid (acc) synthase 6
		WRKY53(AT4G23810.1)	Probable WRKY transcription factor 53
		WRKY40(AT1G80840.1)	Probable WRKY transcription factor 40
		WRKY18(AT4G31800.1)	Arabidopsis thaliana wrky dna-binding protein 18
		WRKY46(AT2G46400.1)	Probable WRKY transcription factor 46
		WRKY70(AT3G56400.1)	Arabidopsis thaliana wrky dna-binding protein 70
LsWRKY12/74	WRKY46	WRKY48(AT5G49520.1)	Arabidopsis thaliana wrky dna-binding protein 48
		WRKY54(AT2G40750.1)	Probable WRKY transcription factor 54
		SIB1(AT3G56710.1)	Sigma factor binding protein 1
		SIB2(AT2G41180.1)	Sigma factor binding protein 2
		WRKY33(AT2G38470.1)	Probable WRKY transcription factor 33
		WRKY53(AT4G23810.1)	Probable WRKY transcription factor 53
		WRKY40(AT1G80840.1)	Probable WRKY transcription factor 40
		WRKY18(AT4G31800.1)	Arabidopsis thaliana wrky dna-binding protein 18
		SZF1(AT3G55980.1)	Zinc finger CCCH domain-containing protein 47
		MPK3(AT3G45640.1)	Mitogen-activated protein kinase 3
		STZ(AT1G27730.1)	Related to Cys2/His2-type zinc-finger proteins found in higher plants
LsWRKY39/51/58	WRKY53	SZF1(AT3G55980.1)	Zinc finger CCCH domain-containing protein 47
		WRKY40(AT1G80840.1)	Probable WRKY transcription factor 40
		WRKY46(AT2G46400.1)	Probable WRKY transcription factor 46
		WRKY70(AT3G56400.1)	Arabidopsis thaliana wrky dna-binding protein 70
		WRKY6(AT1G62300.1)	WRKY family transcription factor
		SIB1(AT3G56710.1)	Sigma factor binding protein 1
		WRKY33(AT2G38470.1)	Probable WRKY transcription factor 33
		MKS1(AT3G18690.1)	MAP kinase substrate 1
		MPK3(AT3G45640.1)	Mitogen-activated protein kinase 3
		WRKY22(AT4G01250.1)	Probable WRKY transcription factor 22
		ACS6(AT4G11280.1)	1-aminocyclopropane-1-carboxylic acid (acc) synthase 6
		STZ(AT1G27730.1)	Related to Cys2/His2-type zinc-finger proteins found in higher plants
LsWRKY28	WRKY40	GUN5(AT5G13630.1)	Magnesium-chelatase subunit chlh
		WRKY18(AT4G31800.1)	Arabidopsis thaliana wrky dna-binding protein 18
		WRKY60(AT2G25000.1)	Probable WRKY transcription factor 60
		WRKY54(AT2G40750.1)	Probable WRKY transcription factor 54
		WRKY48(AT5G49520.1)	Arabidopsis thaliana wrky dna-binding protein 48
		WRKY70(AT3G56400.1)	Arabidopsis thaliana wrky dna-binding protein 70
		WRKY6(AT1G62300.1)	WRKY family transcription factor
		SIB1(AT3G56710.1)	Sigma factor binding protein 1
		WRKY33(AT2G38470.1)	Probable WRKY transcription factor 33
		MKS1(AT3G18690.1)	MAP kinase substrate 1
		WRKY53(AT4G23810.1)	Probable WRKY transcription factor 53
		ACS6(AT4G11280.1)	1-aminocyclopropane-1-carboxylic acid (acc) synthase 6
		STZ(AT1G27730.1)	Related to Cys2/His2-type zinc-finger proteins found in higher plants
		SZF1(AT3G55980.1)	Zinc finger CCCH domain-containing protein 47
		WRKY22(AT4G01250.1)	Probable WRKY transcription factor 22
LsWRKY13	WRKY80	GUN5(AT5G13630.1)	Magnesium-chelatase subunit chlh
		WRKY60(AT2G25000.1)	Probable WRKY transcription factor 60
		WRKY54(AT2G40750.1)	Probable WRKY transcription factor 54
		WRKY48(AT5G49520.1)	Arabidopsis thaliana wrky dna-binding protein 48
		WRKY70(AT3G56400.1)	Arabidopsis thaliana wrky dna-binding protein 70
		WRKY46(AT2G46400.1)	Probable WRKY transcription factor 46
		WRKY40(AT1G80840.1)	Probable WRKY transcription factor 40
		WRKY33(AT2G38470.1)	Probable WRKY transcription factor 33
		STZ(AT1G27730.1)	Related to Cys2/His2-type zinc-finger proteins found in higher plants
		SZF1(AT3G55980.1)	Zinc finger CCCH domain-containing protein 47
LsWRKY74	WRKY34	MPK3(AT3G45640.1)	Mitogen-activated protein kinase 3
LsWRKY25/47	WRKY22	MKS1(AT3G18690.1)	MAP kinase substrate 1
		MPK3(AT3G45640.1)	Mitogen-activated protein kinase 3
		WRKY33(AT2G38470.1)	Probable WRKY transcription factor 33
		WRKY53(AT4G23810.1)	Probable WRKY transcription factor 53
		ACS6(AT4G11280.1)	1-aminocyclopropane-1-carboxylic acid (acc) synthase 6
		SZF1(AT3G55980.1)	Zinc finger CCCH domain-containing protein 47
LsWRKY42	WRKY2	WRKY22(AT4G01250.1)	Probable WRKY transcription factor 22
		ZAP1(AT2G04880.1)	Zinc-dependent activator protein-1
LsWRKY63	ZAP1	WRKY2(AT5G56270.1)	Probable WRKY transcription factor 2
LsWRKY18/57	WRKY3	TTG1(AT5G24520.1)	Transducin/WD40 repeat-like superfamily protein
LsWRKY17/24	WRKY4	GL3(AT5G41315.1)	Basic helix-loop-helix (bHLH) DNA-binding superfamily protein
		TTG1(AT5G24520.1)	Transducin/WD40 repeat-like superfamily protein
LsWRKY6	TTG2	TTG1(AT5G24520.1)	Transducin/WD40 repeat-like superfamily protein
		GL3(AT5G41315.1)	Basic helix-loop-helix (bHLH) DNA-binding superfamily protein
		EGL3(AT1G63650.3)	Basic helix-loop-helix (bHLH) DNA-binding superfamily protein
		TT8(AT4G09820.1)	Basic helix-loop-helix (bHLH) DNA-binding superfamily protein

## Sheet: Table S6
Table S6 Cis elements analysis of LsWRKY genes in lettuce. The red represents lettuce WRKYIII genes.
Gene Number	Start position	End position	Cis elements
LsWRKY01	247	273	auxin-responsive element
LsWRKY06	1362	1389	auxin-responsive element
LsWRKY08	1455	1481	auxin-responsive element
LsWRKY09	235	261	auxin-responsive element
LsWRKY10	666	692	auxin-responsive element
LsWRKY10	1411	1437	auxin-responsive element
LsWRKY11	368	395	auxin-responsive element
LsWRKY11	672	699	auxin-responsive element
LsWRKY12	98	124	auxin-responsive element
LsWRKY16	1320	1346	auxin-responsive element
LsWRKY17	193	219	auxin-responsive element
LsWRKY17	1737	1764	auxin-responsive element
LsWRKY20	310	336	auxin-responsive element
LsWRKY20	837	863	auxin-responsive element
LsWRKY20	1653	1679	auxin-responsive element
LsWRKY21	209	236	auxin-responsive element
LsWRKY22	978	1004	auxin-responsive element
LsWRKY23	831	857	auxin-responsive element
LsWRKY23	1912	1938	auxin-responsive element
LsWRKY26	1310	1337	auxin-responsive element
LsWRKY26	1582	1608	auxin-responsive element
LsWRKY28	581	607	auxin-responsive element
LsWRKY29	356	382	auxin-responsive element
LsWRKY30	1817	1843	auxin-responsive element
LsWRKY32	578	605	auxin-responsive element
LsWRKY33	1087	1113	auxin-responsive element
LsWRKY34	1667	1693	auxin-responsive element
LsWRKY34	1684	1711	auxin-responsive element
LsWRKY35	1472	1498	auxin-responsive element
LsWRKY37	754	780	auxin-responsive element
LsWRKY41	1257	1284	auxin-responsive element
LsWRKY42	142	168	auxin-responsive element
LsWRKY42	904	931	auxin-responsive element
LsWRKY43	1953	1979	auxin-responsive element
LsWRKY43	90	116	auxin-responsive element
LsWRKY44	1340	1366	auxin-responsive element
LsWRKY46	1373	1399	auxin-responsive element
LsWRKY46	159	186	auxin-responsive element
LsWRKY47	1212	1239	auxin-responsive element
LsWRKY47	1754	1781	auxin-responsive element
LsWRKY48	1939	1966	auxin-responsive element
LsWRKY54	323	349	auxin-responsive element
LsWRKY54	1006	1032	auxin-responsive element
LsWRKY54	1090	1117	auxin-responsive element
LsWRKY57	810	837	auxin-responsive element
LsWRKY58	168	194	auxin-responsive element
LsWRKY59	460	487	auxin-responsive element
LsWRKY60	1077	1103	auxin-responsive element
LsWRKY62	1416	1442	auxin-responsive element
LsWRKY68	1691	1717	auxin-responsive element
LsWRKY68	462	488	auxin-responsive element
LsWRKY71	838	864	auxin-responsive element
LsWRKY71	1420	1446	auxin-responsive element
LsWRKY71	1482	1507	auxin-responsive element
LsWRKY73	556	583	auxin-responsive element
LsWRKY74	198	225	auxin-responsive element
LsWRKY74	472	497	auxin-responsive element
LsWRKY01	247	274	gibberellin-responsive element
LsWRKY01	1890	1915	gibberellin-responsive element
LsWRKY01	1258	1283	gibberellin-responsive element
LsWRKY03	1812	1837	gibberellin-responsive element
LsWRKY03	409	434	gibberellin-responsive element
LsWRKY03	1812	1837	gibberellin-responsive element
LsWRKY04	839	864	gibberellin-responsive element
LsWRKY04	1415	1440	gibberellin-responsive element
LsWRKY04	839	864	gibberellin-responsive element
LsWRKY04	1412	1437	gibberellin-responsive element
LsWRKY04	1415	1440	gibberellin-responsive element
LsWRKY05	295	320	gibberellin-responsive element
LsWRKY05	990	1015	gibberellin-responsive element
LsWRKY05	1192	1217	gibberellin-responsive element
LsWRKY05	1751	1776	gibberellin-responsive element
LsWRKY05	295	320	gibberellin-responsive element
LsWRKY05	990	1015	gibberellin-responsive element
LsWRKY05	1192	1217	gibberellin-responsive element
LsWRKY05	1751	1776	gibberellin-responsive element
LsWRKY06	532	557	gibberellin-responsive element
LsWRKY06	711	736	gibberellin-responsive element
LsWRKY06	1138	1163	gibberellin-responsive element
LsWRKY06	1895	1920	gibberellin-responsive element
LsWRKY06	532	559	gibberellin-responsive element
LsWRKY06	711	736	gibberellin-responsive element
LsWRKY06	1138	1163	gibberellin-responsive element
LsWRKY06	1895	1920	gibberellin-responsive element
LsWRKY07	377	402	gibberellin-responsive element
LsWRKY08	343	368	gibberellin-responsive element
LsWRKY08	1005	1030	gibberellin-responsive element
LsWRKY08	1677	1702	gibberellin-responsive element
LsWRKY08	1836	1861	gibberellin-responsive element
LsWRKY08	1839	1864	gibberellin-responsive element
LsWRKY08	343	368	gibberellin-responsive element
LsWRKY08	1005	1030	gibberellin-responsive element
LsWRKY08	1677	1702	gibberellin-responsive element
LsWRKY08	1836	1861	gibberellin-responsive element
LsWRKY08	1839	1864	gibberellin-responsive element
LsWRKY09	1556	1581	gibberellin-responsive element
LsWRKY09	1556	1581	gibberellin-responsive element
LsWRKY10	181	208	gibberellin-responsive element
LsWRKY10	191	216	gibberellin-responsive element
LsWRKY10	341	366	gibberellin-responsive element
LsWRKY10	1881	1906	gibberellin-responsive element
LsWRKY10	1648	1673	gibberellin-responsive element
LsWRKY10	181	208	gibberellin-responsive element
LsWRKY10	191	216	gibberellin-responsive element
LsWRKY10	341	366	gibberellin-responsive element
LsWRKY10	1881	1908	gibberellin-responsive element
LsWRKY11	737	764	gibberellin-responsive element
LsWRKY11	1698	1723	gibberellin-responsive element
LsWRKY11	1698	1723	gibberellin-responsive element
LsWRKY11	904	929	gibberellin-responsive element
LsWRKY12	928	953	gibberellin-responsive element
LsWRKY12	1108	1133	gibberellin-responsive element
LsWRKY12	1108	1133	gibberellin-responsive element
LsWRKY14	96	121	gibberellin-responsive element
LsWRKY14	170	195	gibberellin-responsive element
LsWRKY14	837	862	gibberellin-responsive element
LsWRKY14	1255	1280	gibberellin-responsive element
LsWRKY14	1331	1356	gibberellin-responsive element
LsWRKY14	96	121	gibberellin-responsive element
LsWRKY14	170	197	gibberellin-responsive element
LsWRKY14	837	864	gibberellin-responsive element
LsWRKY14	1255	1280	gibberellin-responsive element
LsWRKY14	1331	1356	gibberellin-responsive element
LsWRKY15	1693	1718	gibberellin-responsive element
LsWRKY15	1552	1577	gibberellin-responsive element
LsWRKY16	1181	1206	gibberellin-responsive element
LsWRKY16	1746	1771	gibberellin-responsive element
LsWRKY16	1181	1206	gibberellin-responsive element
LsWRKY16	1746	1773	gibberellin-responsive element
LsWRKY17	1102	1129	gibberellin-responsive element
LsWRKY17	1274	1301	gibberellin-responsive element
LsWRKY17	1558	1583	gibberellin-responsive element
LsWRKY17	1893	1918	gibberellin-responsive element
LsWRKY17	1902	1927	gibberellin-responsive element
LsWRKY17	1935	1962	gibberellin-responsive element
LsWRKY17	1102	1129	gibberellin-responsive element
LsWRKY17	1274	1299	gibberellin-responsive element
LsWRKY17	1558	1583	gibberellin-responsive element
LsWRKY17	967	994	gibberellin-responsive element
LsWRKY18	1588	1613	gibberellin-responsive element
LsWRKY19	1996	2021	gibberellin-responsive element
LsWRKY19	2010	2035	gibberellin-responsive element
LsWRKY19	1835	1860	gibberellin-responsive element
LsWRKY19	1996	2023	gibberellin-responsive element
LsWRKY19	2010	2035	gibberellin-responsive element
LsWRKY20	121	146	gibberellin-responsive element
LsWRKY20	1706	1731	gibberellin-responsive element
LsWRKY20	1878	1903	gibberellin-responsive element
LsWRKY20	121	146	gibberellin-responsive element
LsWRKY20	1706	1731	gibberellin-responsive element
LsWRKY21	679	706	gibberellin-responsive element
LsWRKY21	1194	1219	gibberellin-responsive element
LsWRKY21	679	704	gibberellin-responsive element
LsWRKY21	1194	1219	gibberellin-responsive element
LsWRKY22	1219	1244	gibberellin-responsive element
LsWRKY22	53	78	gibberellin-responsive element
LsWRKY22	195	220	gibberellin-responsive element
LsWRKY22	1383	1408	gibberellin-responsive element
LsWRKY22	53	78	gibberellin-responsive element
LsWRKY22	195	220	gibberellin-responsive element
LsWRKY22	1383	1408	gibberellin-responsive element
LsWRKY23	1028	1055	gibberellin-responsive element
LsWRKY23	1491	1518	gibberellin-responsive element
LsWRKY23	1028	1055	gibberellin-responsive element
LsWRKY23	1491	1518	gibberellin-responsive element
LsWRKY23	964	989	gibberellin-responsive element
LsWRKY24	1637	1664	gibberellin-responsive element
LsWRKY24	1616	1641	gibberellin-responsive element
LsWRKY25	786	811	gibberellin-responsive element
LsWRKY26	2008	2033	gibberellin-responsive element
LsWRKY26	1395	1422	gibberellin-responsive element
LsWRKY26	2008	2033	gibberellin-responsive element
LsWRKY27	520	545	gibberellin-responsive element
LsWRKY27	1809	1836	gibberellin-responsive element
LsWRKY27	1531	1556	gibberellin-responsive element
LsWRKY27	520	545	gibberellin-responsive element
LsWRKY27	1809	1834	gibberellin-responsive element
LsWRKY27	2020	2045	gibberellin-responsive element
LsWRKY28	456	483	gibberellin-responsive element
LsWRKY28	531	556	gibberellin-responsive element
LsWRKY28	456	481	gibberellin-responsive element
LsWRKY28	531	558	gibberellin-responsive element
LsWRKY28	718	745	gibberellin-responsive element
LsWRKY29	1002	1027	gibberellin-responsive element
LsWRKY29	1002	1027	gibberellin-responsive element
LsWRKY30	1895	1922	gibberellin-responsive element
LsWRKY32	1010	1037	gibberellin-responsive element
LsWRKY33	1186	1213	gibberellin-responsive element
LsWRKY33	1186	1211	gibberellin-responsive element
LsWRKY33	1797	1824	gibberellin-responsive element
LsWRKY34	1170	1195	gibberellin-responsive element
LsWRKY34	1123	1150	gibberellin-responsive element
LsWRKY35	1392	1417	gibberellin-responsive element
LsWRKY35	1138	1165	gibberellin-responsive element
LsWRKY35	1392	1417	gibberellin-responsive element
LsWRKY36	2002	2027	gibberellin-responsive element
LsWRKY37	1531	1556	gibberellin-responsive element
LsWRKY37	1732	1757	gibberellin-responsive element
LsWRKY37	1531	1556	gibberellin-responsive element
LsWRKY38	266	291	gibberellin-responsive element
LsWRKY38	421	446	gibberellin-responsive element
LsWRKY38	471	496	gibberellin-responsive element
LsWRKY38	1194	1219	gibberellin-responsive element
LsWRKY38	1206	1231	gibberellin-responsive element
LsWRKY38	266	291	gibberellin-responsive element
LsWRKY38	421	446	gibberellin-responsive element
LsWRKY38	471	496	gibberellin-responsive element
LsWRKY38	1194	1219	gibberellin-responsive element
LsWRKY38	1206	1233	gibberellin-responsive element
LsWRKY40	424	449	gibberellin-responsive element
LsWRKY40	1771	1796	gibberellin-responsive element
LsWRKY40	1783	1808	gibberellin-responsive element
LsWRKY40	393	418	gibberellin-responsive element
LsWRKY40	424	449	gibberellin-responsive element
LsWRKY40	1771	1798	gibberellin-responsive element
LsWRKY40	1783	1810	gibberellin-responsive element
LsWRKY41	83	110	gibberellin-responsive element
LsWRKY41	83	108	gibberellin-responsive element
LsWRKY42	236	261	gibberellin-responsive element
LsWRKY42	1257	1282	gibberellin-responsive element
LsWRKY42	1353	1378	gibberellin-responsive element
LsWRKY42	694	719	gibberellin-responsive element
LsWRKY42	703	728	gibberellin-responsive element
LsWRKY42	1893	1920	gibberellin-responsive element
LsWRKY42	694	719	gibberellin-responsive element
LsWRKY42	703	728	gibberellin-responsive element
LsWRKY42	1893	1918	gibberellin-responsive element
LsWRKY43	1568	1593	gibberellin-responsive element
LsWRKY43	459	484	gibberellin-responsive element
LsWRKY43	670	695	gibberellin-responsive element
LsWRKY43	1067	1092	gibberellin-responsive element
LsWRKY43	1839	1864	gibberellin-responsive element
LsWRKY43	1851	1876	gibberellin-responsive element
LsWRKY43	459	484	gibberellin-responsive element
LsWRKY43	670	695	gibberellin-responsive element
LsWRKY43	1067	1092	gibberellin-responsive element
LsWRKY43	1839	1866	gibberellin-responsive element
LsWRKY43	1851	1878	gibberellin-responsive element
LsWRKY44	1490	1517	gibberellin-responsive element
LsWRKY44	1490	1517	gibberellin-responsive element
LsWRKY45	1179	1204	gibberellin-responsive element
LsWRKY45	933	958	gibberellin-responsive element
LsWRKY45	1120	1147	gibberellin-responsive element
LsWRKY46	1587	1612	gibberellin-responsive element
LsWRKY46	787	812	gibberellin-responsive element
LsWRKY46	787	812	gibberellin-responsive element
LsWRKY47	1638	1663	gibberellin-responsive element
LsWRKY49	221	246	gibberellin-responsive element
LsWRKY49	1067	1092	gibberellin-responsive element
LsWRKY49	1085	1110	gibberellin-responsive element
LsWRKY49	221	248	gibberellin-responsive element
LsWRKY49	1067	1092	gibberellin-responsive element
LsWRKY49	1085	1110	gibberellin-responsive element
LsWRKY50	1717	1742	gibberellin-responsive element
LsWRKY50	1218	1243	gibberellin-responsive element
LsWRKY50	1717	1742	gibberellin-responsive element
LsWRKY51	255	280	gibberellin-responsive element
LsWRKY51	255	280	gibberellin-responsive element
LsWRKY52	824	849	gibberellin-responsive element
LsWRKY52	874	899	gibberellin-responsive element
LsWRKY52	1850	1877	gibberellin-responsive element
LsWRKY52	824	849	gibberellin-responsive element
LsWRKY52	874	899	gibberellin-responsive element
LsWRKY52	1850	1875	gibberellin-responsive element
LsWRKY52	548	573	gibberellin-responsive element
LsWRKY53	248	273	gibberellin-responsive element
LsWRKY53	850	877	gibberellin-responsive element
LsWRKY53	248	273	gibberellin-responsive element
LsWRKY53	850	875	gibberellin-responsive element
LsWRKY54	1582	1607	gibberellin-responsive element
LsWRKY54	1418	1450	gibberellin-responsive element
LsWRKY54	1582	1607	gibberellin-responsive element
LsWRKY55	1918	1943	gibberellin-responsive element
LsWRKY55	1918	1943	gibberellin-responsive element
LsWRKY55	676	701	gibberellin-responsive element
LsWRKY56	1074	1099	gibberellin-responsive element
LsWRKY56	1819	1844	gibberellin-responsive element
LsWRKY56	1074	1099	gibberellin-responsive element
LsWRKY56	1819	1844	gibberellin-responsive element
LsWRKY57	231	256	gibberellin-responsive element
LsWRKY57	664	689	gibberellin-responsive element
LsWRKY57	752	777	gibberellin-responsive element
LsWRKY57	1530	1555	gibberellin-responsive element
LsWRKY57	231	256	gibberellin-responsive element
LsWRKY57	664	689	gibberellin-responsive element
LsWRKY57	752	779	gibberellin-responsive element
LsWRKY57	1530	1555	gibberellin-responsive element
LsWRKY58	333	358	gibberellin-responsive element
LsWRKY58	1466	1493	gibberellin-responsive element
LsWRKY58	742	769	gibberellin-responsive element
LsWRKY58	333	360	gibberellin-responsive element
LsWRKY58	1466	1493	gibberellin-responsive element
LsWRKY60	1146	1171	gibberellin-responsive element
LsWRKY60	1138	1165	gibberellin-responsive element
LsWRKY60	1403	1428	gibberellin-responsive element
LsWRKY60	1811	1838	gibberellin-responsive element
LsWRKY61	209	236	gibberellin-responsive element
LsWRKY61	1855	1882	gibberellin-responsive element
LsWRKY61	209	234	gibberellin-responsive element
LsWRKY62	1929	1954	gibberellin-responsive element
LsWRKY62	1938	1963	gibberellin-responsive element
LsWRKY63	788	813	gibberellin-responsive element
LsWRKY64	840	865	gibberellin-responsive element
LsWRKY64	840	865	gibberellin-responsive element
LsWRKY65	858	885	gibberellin-responsive element
LsWRKY65	858	883	gibberellin-responsive element
LsWRKY66	1724	1749	gibberellin-responsive element
LsWRKY66	1724	1749	gibberellin-responsive element
LsWRKY67	2004	2029	gibberellin-responsive element
LsWRKY67	950	975	gibberellin-responsive element
LsWRKY67	950	975	gibberellin-responsive element
LsWRKY68	1433	1458	gibberellin-responsive element
LsWRKY68	1524	1549	gibberellin-responsive element
LsWRKY68	1433	1458	gibberellin-responsive element
LsWRKY68	1524	1549	gibberellin-responsive element
LsWRKY69	952	977	gibberellin-responsive element
LsWRKY69	1756	1781	gibberellin-responsive element
LsWRKY69	1770	1797	gibberellin-responsive element
LsWRKY69	952	977	gibberellin-responsive element
LsWRKY69	1756	1781	gibberellin-responsive element
LsWRKY69	1770	1795	gibberellin-responsive element
LsWRKY69	154	179	gibberellin-responsive element
LsWRKY70	141	166	gibberellin-responsive element
LsWRKY70	146	171	gibberellin-responsive element
LsWRKY70	1089	1114	gibberellin-responsive element
LsWRKY70	1402	1427	gibberellin-responsive element
LsWRKY70	1444	1469	gibberellin-responsive element
LsWRKY70	1714	1739	gibberellin-responsive element
LsWRKY70	1765	1790	gibberellin-responsive element
LsWRKY70	1789	1814	gibberellin-responsive element
LsWRKY70	1875	1900	gibberellin-responsive element
LsWRKY70	141	166	gibberellin-responsive element
LsWRKY70	146	171	gibberellin-responsive element
LsWRKY70	1089	1114	gibberellin-responsive element
LsWRKY70	1402	1427	gibberellin-responsive element
LsWRKY70	1444	1469	gibberellin-responsive element
LsWRKY70	1714	1739	gibberellin-responsive element
LsWRKY70	1765	1790	gibberellin-responsive element
LsWRKY70	1789	1814	gibberellin-responsive element
LsWRKY70	1875	1900	gibberellin-responsive element
LsWRKY71	1331	1356	gibberellin-responsive element
LsWRKY71	1381	1408	gibberellin-responsive element
LsWRKY71	1722	1747	gibberellin-responsive element
LsWRKY71	1769	1794	gibberellin-responsive element
LsWRKY71	1793	1818	gibberellin-responsive element
LsWRKY71	1748	1773	gibberellin-responsive element
LsWRKY71	1331	1356	gibberellin-responsive element
LsWRKY71	1381	1406	gibberellin-responsive element
LsWRKY71	1722	1747	gibberellin-responsive element
LsWRKY71	1769	1794	gibberellin-responsive element
LsWRKY71	1793	1818	gibberellin-responsive element
LsWRKY72	630	655	gibberellin-responsive element
LsWRKY72	816	841	gibberellin-responsive element
LsWRKY72	992	1017	gibberellin-responsive element
LsWRKY72	1532	1557	gibberellin-responsive element
LsWRKY72	1755	1780	gibberellin-responsive element
LsWRKY72	1779	1804	gibberellin-responsive element
LsWRKY72	630	655	gibberellin-responsive element
LsWRKY72	816	841	gibberellin-responsive element
LsWRKY72	992	1017	gibberellin-responsive element
LsWRKY72	1532	1557	gibberellin-responsive element
LsWRKY72	1755	1780	gibberellin-responsive element
LsWRKY72	1779	1804	gibberellin-responsive element
LsWRKY73	236	263	gibberellin-responsive element
LsWRKY73	409	434	gibberellin-responsive element
LsWRKY73	236	261	gibberellin-responsive element
LsWRKY73	409	434	gibberellin-responsive element
LsWRKY74	913	938	gibberellin-responsive element
LsWRKY75	1789	1816	gibberellin-responsive element
LsWRKY75	1792	1817	gibberellin-responsive element
LsWRKY75	1804	1829	gibberellin-responsive element
LsWRKY75	1807	1832	gibberellin-responsive element
LsWRKY75	541	566	gibberellin-responsive element
LsWRKY75	1789	1816	gibberellin-responsive element
LsWRKY75	1792	1819	gibberellin-responsive element
LsWRKY75	1804	1831	gibberellin-responsive element
LsWRKY75	1807	1832	gibberellin-responsive element
LsWRKY76	1314	1339	gibberellin-responsive element
LsWRKY76	1578	1603	gibberellin-responsive element
LsWRKY76	1861	1886	gibberellin-responsive element
LsWRKY76	1583	1609	gibberellin-responsive element
LsWRKY76	1782	1808	gibberellin-responsive element
LsWRKY76	1583	1609	gibberellin-responsive element
LsWRKY76	1782	1808	gibberellin-responsive element
LsWRKY05	1660	1686	low-temperature responsiveness element
LsWRKY07	422	448	low-temperature responsiveness element
LsWRKY07	486	512	low-temperature responsiveness element
LsWRKY07	493	519	low-temperature responsiveness element
LsWRKY07	511	537	low-temperature responsiveness element
LsWRKY07	523	549	low-temperature responsiveness element
LsWRKY07	896	922	low-temperature responsiveness element
LsWRKY07	971	997	low-temperature responsiveness element
LsWRKY07	983	1009	low-temperature responsiveness element
LsWRKY12	1483	1509	low-temperature responsiveness element
LsWRKY13	1954	1980	low-temperature responsiveness element
LsWRKY14	1568	1594	low-temperature responsiveness element
LsWRKY14	1790	1816	low-temperature responsiveness element
LsWRKY18	252	278	low-temperature responsiveness element
LsWRKY18	309	335	low-temperature responsiveness element
LsWRKY18	315	341	low-temperature responsiveness element
LsWRKY18	324	350	low-temperature responsiveness element
LsWRKY18	371	397	low-temperature responsiveness element
LsWRKY18	389	415	low-temperature responsiveness element
LsWRKY18	529	555	low-temperature responsiveness element
LsWRKY18	718	744	low-temperature responsiveness element
LsWRKY21	126	152	low-temperature responsiveness element
LsWRKY21	1613	1639	low-temperature responsiveness element
LsWRKY21	1691	1717	low-temperature responsiveness element
LsWRKY23	1207	1233	low-temperature responsiveness element
LsWRKY23	1403	1429	low-temperature responsiveness element
LsWRKY32	821	847	low-temperature responsiveness element
LsWRKY39	1525	1551	low-temperature responsiveness element
LsWRKY39	1787	1813	low-temperature responsiveness element
LsWRKY42	1164	1190	low-temperature responsiveness element
LsWRKY42	1606	1632	low-temperature responsiveness element
LsWRKY43	1704	1730	low-temperature responsiveness element
LsWRKY44	1830	1856	low-temperature responsiveness element
LsWRKY44	1904	1930	low-temperature responsiveness element
LsWRKY49	781	807	low-temperature responsiveness element
LsWRKY54	1307	1333	low-temperature responsiveness element
LsWRKY55	1951	1977	low-temperature responsiveness element
LsWRKY56	723	749	low-temperature responsiveness element
LsWRKY57	729	755	low-temperature responsiveness element
LsWRKY57	1309	1335	low-temperature responsiveness element
LsWRKY57	1489	1515	low-temperature responsiveness element
LsWRKY57	1506	1532	low-temperature responsiveness element
LsWRKY61	192	218	low-temperature responsiveness element
LsWRKY63	396	422	low-temperature responsiveness element
LsWRKY63	423	449	low-temperature responsiveness element
LsWRKY67	173	199	low-temperature responsiveness element
LsWRKY67	311	337	low-temperature responsiveness element
LsWRKY68	367	393	low-temperature responsiveness element
LsWRKY68	1030	1056	low-temperature responsiveness element
LsWRKY72	379	405	low-temperature responsiveness element
LsWRKY74	722	748	low-temperature responsiveness element
LsWRKY74	1067	1096	low-temperature responsiveness element
LsWRKY74	1108	1137	low-temperature responsiveness element
LsWRKY76	1902	1931	low-temperature responsiveness element
LsWRKY76	1996	2025	low-temperature responsiveness element
LsWRKY01	375	404	defense and stress responsiveness element
LsWRKY05	1380	1409	defense and stress responsiveness element
LsWRKY07	1223	1252	defense and stress responsiveness element
LsWRKY07	1816	1845	defense and stress responsiveness element
LsWRKY09	973	1002	defense and stress responsiveness element
LsWRKY12	1343	1372	defense and stress responsiveness element
LsWRKY16	1651	1680	defense and stress responsiveness element
LsWRKY18	1050	1079	defense and stress responsiveness element
LsWRKY19	765	794	defense and stress responsiveness element
LsWRKY21	683	712	defense and stress responsiveness element
LsWRKY26	803	832	defense and stress responsiveness element
LsWRKY27	1874	1903	defense and stress responsiveness element
LsWRKY32	1777	1806	defense and stress responsiveness element
LsWRKY33	1606	1635	defense and stress responsiveness element
LsWRKY37	73	102	defense and stress responsiveness element
LsWRKY38	1141	1170	defense and stress responsiveness element
LsWRKY38	1789	1818	defense and stress responsiveness element
LsWRKY41	1811	1840	defense and stress responsiveness element
LsWRKY42	1056	1085	WUN-motif
LsWRKY43	1579	1608	defense and stress responsiveness element
LsWRKY44	636	665	defense and stress responsiveness element
LsWRKY51	123	152	defense and stress responsiveness element
LsWRKY54	1437	1466	defense and stress responsiveness element
LsWRKY62	1830	1859	defense and stress responsiveness element
LsWRKY64	169	198	defense and stress responsiveness element
LsWRKY66	1669	1698	defense and stress responsiveness element
LsWRKY68	1807	1836	defense and stress responsiveness element
LsWRKY73	1891	1922	defense and stress responsiveness element
LsWRKY75	1737	1766	defense and stress responsiveness element
LsWRKY05	942	971	salicylic acid responsiveness element
LsWRKY06	1410	1439	salicylic acid responsiveness element
LsWRKY08	755	784	salicylic acid responsiveness element
LsWRKY09	664	693	salicylic acid responsiveness element
LsWRKY10	1736	1765	salicylic acid responsiveness element
LsWRKY17	1216	1245	salicylic acid responsiveness element
LsWRKY20	58	87	salicylic acid responsiveness element
LsWRKY20	788	817	salicylic acid responsiveness element
LsWRKY22	1995	2024	salicylic acid responsiveness element
LsWRKY27	1483	1512	salicylic acid responsiveness element
LsWRKY28	421	450	salicylic acid responsiveness element
LsWRKY28	1179	1208	salicylic acid responsiveness element
LsWRKY31	1678	1707	salicylic acid responsiveness element
LsWRKY31	1713	1742	salicylic acid responsiveness element
LsWRKY33	1938	1967	salicylic acid responsiveness element
LsWRKY34	945	974	salicylic acid responsiveness element
LsWRKY35	765	794	salicylic acid responsiveness element
LsWRKY35	1062	1091	salicylic acid responsiveness element
LsWRKY35	1929	1958	salicylic acid responsiveness element
LsWRKY38	543	572	salicylic acid responsiveness element
LsWRKY40	1297	1326	salicylic acid responsiveness element
LsWRKY40	1872	1901	salicylic acid responsiveness element
LsWRKY42	1056	1085	salicylic acid responsiveness element
LsWRKY45	159	188	salicylic acid responsiveness element
LsWRKY45	771	800	salicylic acid responsiveness element
LsWRKY45	955	984	salicylic acid responsiveness element
LsWRKY46	1235	1264	salicylic acid responsiveness element
LsWRKY50	1833	1862	salicylic acid responsiveness element
LsWRKY51	831	860	salicylic acid responsiveness element
LsWRKY51	1776	1805	salicylic acid responsiveness element
LsWRKY53	138	167	salicylic acid responsiveness element
LsWRKY53	399	428	salicylic acid responsiveness element
LsWRKY54	1120	1149	salicylic acid responsiveness element
LsWRKY55	1366	1395	salicylic acid responsiveness element
LsWRKY55	1963	1992	salicylic acid responsiveness element
LsWRKY56	895	925	salicylic acid responsiveness element
LsWRKY56	1596	1625	salicylic acid responsiveness element
LsWRKY57	50	79	salicylic acid responsiveness element
LsWRKY57	1446	1475	salicylic acid responsiveness element
LsWRKY61	428	457	salicylic acid responsiveness element
LsWRKY62	1875	1904	salicylic acid responsiveness element
LsWRKY64	1826	1855	salicylic acid responsiveness element
LsWRKY68	1218	1245	salicylic acid responsiveness element
LsWRKY73	765	792	salicylic acid responsiveness element
LsWRKY75	1234	1261	salicylic acid responsiveness element
LsWRKY75	1383	1410	salicylic acid responsiveness element
LsWRKY05	208	234	MYB binding site
LsWRKY06	260	286	MYB binding site
LsWRKY06	361	387	MYB binding site
LsWRKY06	1438	1464	MYB binding site
LsWRKY06	1031	1058	MYB binding site
LsWRKY06	1291	1318	MYB binding site
LsWRKY06	1403	1429	MYB binding site
LsWRKY06	1539	1566	MYB binding site
LsWRKY08	161	188	MYB binding site
LsWRKY08	970	997	MYB binding site
LsWRKY10	644	670	MYB binding site
LsWRKY10	1460	1486	MYB binding site
LsWRKY10	1627	1654	MYB binding site
LsWRKY11	854	880	MYB binding site
LsWRKY13	1618	1644	MYB binding site
LsWRKY13	2008	2035	MYB binding site
LsWRKY15	1488	1515	MYB binding site
LsWRKY15	1970	1997	MYB binding site
LsWRKY16	106	133	MYB binding site
LsWRKY17	1037	1064	MYB binding site
LsWRKY17	1247	1274	MYB binding site
LsWRKY17	1729	1756	MYB binding site
LsWRKY18	480	510.5	MYB binding site
LsWRKY19	1938	1968.5	MYB binding site
LsWRKY20	1478	1504	MYB binding site
LsWRKY20	1957	1983	MYB binding site
LsWRKY21	1479	1505	MYB binding site
LsWRKY22	1884	1910	MYB binding site
LsWRKY22	1858	1885	MYB binding site
LsWRKY23	1589	1616	MYB binding site
LsWRKY25	840	867	MYB binding site
LsWRKY27	1447	1473	MYB binding site
LsWRKY27	970	997	MYB binding site
LsWRKY29	1056	1083	MYB binding site
LsWRKY29	1444	1470	MYB binding site
LsWRKY29	1425	1451	MYB binding site
LsWRKY31	948	975	MYB binding site
LsWRKY32	1249	1276	MYB binding site
LsWRKY32	942	969	MYB binding site
LsWRKY32	1408	1435	MYB binding site
LsWRKY33	1473	1500	MYB binding site
LsWRKY34	1372	1399	MYB binding site
LsWRKY34	1520	1547	MYB binding site
LsWRKY35	309	335	MYB binding site
LsWRKY35	815	841	MYB binding site
LsWRKY35	1091	1122	MYB binding site
LsWRKY36	1240	1267	MYB binding site
LsWRKY39	215	242	MYB binding site
LsWRKY39	688	715	MYB binding site
LsWRKY39	1216	1242	MYB binding site
LsWRKY41	229	255	MYB binding site
LsWRKY43	447	473	MYB binding site
LsWRKY47	764	790	MYB binding site
LsWRKY49	1052	1078	MYB binding site
LsWRKY51	52	78	MYB binding site
LsWRKY51	1504	1530	MYB binding site
LsWRKY51	1555	1581	MYB binding site
LsWRKY51	1707	1733	MYB binding site
LsWRKY53	1993	2020	MYB binding site
LsWRKY54	1681	1708	MYB binding site
LsWRKY56	1312	1338	MYB binding site
LsWRKY57	1036	1062	MYB binding site
LsWRKY58	1267	1297.5	MYB binding site
LsWRKY59	512	539	MYB binding site
LsWRKY61	325	352	MYB binding site
LsWRKY63	1409	1436	MYB binding site
LsWRKY64	1147	1173	MYB binding site
LsWRKY64	229	256	MYB binding site
LsWRKY66	605	632	MYB binding site
LsWRKY66	744	770	MYB binding site
LsWRKY67	730	757	MYB binding site
LsWRKY68	623	650	MYB binding site
LsWRKY68	1552	1579	MYB binding site
LsWRKY68	1673	1703.5	MYB binding site
LsWRKY70	1034	1060	MYB binding site
LsWRKY71	374	404.5	MYB binding site
LsWRKY71	523	550	MYB binding site
LsWRKY73	1267	1293	MYB binding site
LsWRKY74	1956	1981	MYB binding site
LsWRKY75	892	917	MYB binding site
LsWRKY03	1818	1843	abscisic acid responsiveness element
LsWRKY03	1858	1883	abscisic acid responsiveness element
LsWRKY03	1859	1884	abscisic acid responsiveness element
LsWRKY04	202	227	abscisic acid responsiveness element
LsWRKY06	542	567	abscisic acid responsiveness element
LsWRKY06	1136	1165	abscisic acid responsiveness element
LsWRKY06	1306	1335	abscisic acid responsiveness element
LsWRKY07	693	718	abscisic acid responsiveness element
LsWRKY07	1220	1245	abscisic acid responsiveness element
LsWRKY07	1587	1612	abscisic acid responsiveness element
LsWRKY07	1938	1963	abscisic acid responsiveness element
LsWRKY07	1941	1966	abscisic acid responsiveness element
LsWRKY08	537	562	abscisic acid responsiveness element
LsWRKY09	516	541	abscisic acid responsiveness element
LsWRKY09	704	729	abscisic acid responsiveness element
LsWRKY10	757	782	abscisic acid responsiveness element
LsWRKY10	1980	2005	abscisic acid responsiveness element
LsWRKY11	530	555	abscisic acid responsiveness element
LsWRKY12	799	824	abscisic acid responsiveness element
LsWRKY12	1315	1340	abscisic acid responsiveness element
LsWRKY13	1679	1705	abscisic acid responsiveness element
LsWRKY14	162	187	abscisic acid responsiveness element
LsWRKY14	330	355	abscisic acid responsiveness element
LsWRKY20	1586	1611	abscisic acid responsiveness element
LsWRKY20	2025	2050	abscisic acid responsiveness element
LsWRKY20	2026	2055	abscisic acid responsiveness element
LsWRKY21	1196	1222	abscisic acid responsiveness element
LsWRKY21	1879	1904	abscisic acid responsiveness element
LsWRKY22	51	80	abscisic acid responsiveness element
LsWRKY22	74	100	abscisic acid responsiveness element
LsWRKY22	76	101	abscisic acid responsiveness element
LsWRKY22	77	102	abscisic acid responsiveness element
LsWRKY22	162	187	abscisic acid responsiveness element
LsWRKY22	164	189	abscisic acid responsiveness element
LsWRKY22	165	190	abscisic acid responsiveness element
LsWRKY22	187	212	abscisic acid responsiveness element
LsWRKY23	680	708	abscisic acid responsiveness element
LsWRKY25	1317	1342	abscisic acid responsiveness element
LsWRKY25	1813	1838	abscisic acid responsiveness element
LsWRKY26	1789	1814	abscisic acid responsiveness element
LsWRKY27	814	839	abscisic acid responsiveness element
LsWRKY27	816	841	abscisic acid responsiveness element
LsWRKY27	1589	1614	abscisic acid responsiveness element
LsWRKY27	1802	1827	abscisic acid responsiveness element
LsWRKY27	1990	2019	abscisic acid responsiveness element
LsWRKY28	195	221	abscisic acid responsiveness element
LsWRKY29	1005	1030	abscisic acid responsiveness element
LsWRKY31	448	473	abscisic acid responsiveness element
LsWRKY31	1844	1869	abscisic acid responsiveness element
LsWRKY32	1827	1852	abscisic acid responsiveness element
LsWRKY32	1828	1853	abscisic acid responsiveness element
LsWRKY33	286	314	abscisic acid responsiveness element
LsWRKY34	156	181	abscisic acid responsiveness element
LsWRKY34	1103	1128	abscisic acid responsiveness element
LsWRKY35	1235	1260	abscisic acid responsiveness element
LsWRKY37	394	419	abscisic acid responsiveness element
LsWRKY37	396	423	abscisic acid responsiveness element
LsWRKY37	1781	1808	abscisic acid responsiveness element
LsWRKY37	1950	1976	abscisic acid responsiveness element
LsWRKY38	461	486	abscisic acid responsiveness element
LsWRKY38	582	609	abscisic acid responsiveness element
LsWRKY38	634	663	abscisic acid responsiveness element
LsWRKY38	1087	1112	abscisic acid responsiveness element
LsWRKY38	1088	1114	abscisic acid responsiveness element
LsWRKY38	1212	1237	abscisic acid responsiveness element
LsWRKY38	1423	1448	abscisic acid responsiveness element
LsWRKY38	1425	1453	abscisic acid responsiveness element
LsWRKY39	1652	1677	abscisic acid responsiveness element
LsWRKY39	1653	1678	abscisic acid responsiveness element
LsWRKY41	1297	1322	abscisic acid responsiveness element
LsWRKY41	1897	1922	abscisic acid responsiveness element
LsWRKY41	1898	1923	abscisic acid responsiveness element
LsWRKY42	595	621	abscisic acid responsiveness element
LsWRKY42	705	730	abscisic acid responsiveness element
LsWRKY43	148	173	abscisic acid responsiveness element
LsWRKY43	1069	1094	abscisic acid responsiveness element
LsWRKY43	1824	1849	abscisic acid responsiveness element
LsWRKY43	1825	1850	abscisic acid responsiveness element
LsWRKY43	1912	1937	abscisic acid responsiveness element
LsWRKY44	1789	1814	abscisic acid responsiveness element
LsWRKY45	1948	1973	abscisic acid responsiveness element
LsWRKY46	874	899	abscisic acid responsiveness element
LsWRKY47	183	208	abscisic acid responsiveness element
LsWRKY47	816	845	abscisic acid responsiveness element
LsWRKY48	383	412	abscisic acid responsiveness element
LsWRKY48	427	452	abscisic acid responsiveness element
LsWRKY48	748	773	abscisic acid responsiveness element
LsWRKY48	1039	1064	abscisic acid responsiveness element
LsWRKY48	1045	1074	abscisic acid responsiveness element
LsWRKY48	1047	1072	abscisic acid responsiveness element
LsWRKY49	374	399	abscisic acid responsiveness element
LsWRKY50	1391	1420	abscisic acid responsiveness element
LsWRKY52	529	554	abscisic acid responsiveness element
LsWRKY52	532	561	abscisic acid responsiveness element
LsWRKY52	662	687	abscisic acid responsiveness element
LsWRKY52	944	969	abscisic acid responsiveness element
LsWRKY55	75	100	abscisic acid responsiveness element
LsWRKY55	1324	1349	abscisic acid responsiveness element
LsWRKY56	674	699	abscisic acid responsiveness element
LsWRKY56	1332	1357	abscisic acid responsiveness element
LsWRKY56	1745	1770	abscisic acid responsiveness element
LsWRKY57	229	254	abscisic acid responsiveness element
LsWRKY57	1959	1984	abscisic acid responsiveness element
LsWRKY58	725	754	abscisic acid responsiveness element
LsWRKY60	1994	2020	abscisic acid responsiveness element
LsWRKY61	217	242	abscisic acid responsiveness element
LsWRKY61	513	538	abscisic acid responsiveness element
LsWRKY64	886	911	abscisic acid responsiveness element
LsWRKY64	888	913	abscisic acid responsiveness element
LsWRKY64	889	914	abscisic acid responsiveness element
LsWRKY65	1904	1929	abscisic acid responsiveness element
LsWRKY66	148	173	abscisic acid responsiveness element
LsWRKY69	949	977	abscisic acid responsiveness element
LsWRKY70	101	126	abscisic acid responsiveness element
LsWRKY70	139	164	abscisic acid responsiveness element
LsWRKY70	1854	1881	abscisic acid responsiveness element
LsWRKY71	1430	1455	abscisic acid responsiveness element
LsWRKY71	1431	1456	abscisic acid responsiveness element
LsWRKY72	475	501	abscisic acid responsiveness element
LsWRKY72	1848	1873	abscisic acid responsiveness element
LsWRKY73	851	876	abscisic acid responsiveness element
LsWRKY74	818	843	abscisic acid responsiveness element
LsWRKY75	1032	1059	abscisic acid responsiveness element
LsWRKY75	1033	1059	abscisic acid responsiveness element
LsWRKY76	989	1016	abscisic acid responsiveness element
LsWRKY76	1585	1612	abscisic acid responsiveness element
LsWRKY03	791	818	light responsive element
LsWRKY03	792	819	light responsive element
LsWRKY03	1472	1504	light responsive element
LsWRKY04	947	973	light responsive element
LsWRKY04	1083	1109	light responsive element
LsWRKY04	1720	1746	light responsive element
LsWRKY06	1431	1457	light responsive element
LsWRKY06	655	681	light responsive element
LsWRKY07	364	390	light responsive element
LsWRKY07	369	395	light responsive element
LsWRKY07	906	932	light responsive element
LsWRKY07	1009	1036	light responsive element
LsWRKY07	709	735	light responsive element
LsWRKY07	1991	2018	light responsive element
LsWRKY09	520	546	light responsive element
LsWRKY09	933	959	light responsive element
LsWRKY10	421	447	light responsive element
LsWRKY10	1630	1656	light responsive element
LsWRKY12	1342	1369	light responsive element
LsWRKY14	110	136	light responsive element
LsWRKY14	1029	1055	light responsive element
LsWRKY14	1919	1945	light responsive element
LsWRKY15	76	102	light responsive element
LsWRKY15	680	707	light responsive element
LsWRKY18	456	482	light responsive element
LsWRKY18	652	681	light responsive element
LsWRKY20	1138	1164	light responsive element
LsWRKY20	1555	1581	light responsive element
LsWRKY20	1731	1758	light responsive element
LsWRKY22	234	260	light responsive element
LsWRKY22	312	342	light responsive element
LsWRKY23	1775	1801	light responsive element
LsWRKY24	1037	1063	light responsive element
LsWRKY24	1038	1065	light responsive element
LsWRKY26	1904	1930	light responsive element
LsWRKY27	337	363	light responsive element
LsWRKY27	729	756	light responsive element
LsWRKY27	885	911	light responsive element
LsWRKY27	886	912	light responsive element
LsWRKY27	1906	1933	light responsive element
LsWRKY29	1053	1079	light responsive element
LsWRKY29	1054	1080	light responsive element
LsWRKY30	720	746	light responsive element
LsWRKY30	733	759	light responsive element
LsWRKY30	734	760	light responsive element
LsWRKY30	839	865	light responsive element
LsWRKY30	206	232	light responsive element
LsWRKY30	436	462	light responsive element
LsWRKY30	520	546	light responsive element
LsWRKY31	331	358	light responsive element
LsWRKY34	526	552	light responsive element
LsWRKY34	650	677	light responsive element
LsWRKY35	818	845	light responsive element
LsWRKY35	976	1003	light responsive element
LsWRKY35	977	1003	light responsive element
LsWRKY37	905	932	light responsive element
LsWRKY37	1103	1132	light responsive element
LsWRKY37	1291	1317	light responsive element
LsWRKY39	1192	1221	light responsive element
LsWRKY41	1599	1629	light responsive element
LsWRKY41	1916	1942	light responsive element
LsWRKY42	403	429	light responsive element
LsWRKY43	1906	1932	light responsive element
LsWRKY44	1153	1180	light responsive element
LsWRKY44	761	791	light responsive element
LsWRKY45	366	392	light responsive element
LsWRKY45	1477	1503	light responsive element
LsWRKY45	2007	2033	light responsive element
LsWRKY46	1600	1626	light responsive element
LsWRKY47	767	794	light responsive element
LsWRKY50	241	267	light responsive element
LsWRKY52	1792	1818	light responsive element
LsWRKY52	851	878	light responsive element
LsWRKY53	989	1015	light responsive element
LsWRKY53	1719	1745	light responsive element
LsWRKY55	990	1017	light responsive element
LsWRKY57	1060	1086	light responsive element
LsWRKY57	1061	1090	light responsive element
LsWRKY58	1383	1409	light responsive element
LsWRKY61	1360	1386	light responsive element
LsWRKY61	1361	1391	light responsive element
LsWRKY62	1609	1635	light responsive element
LsWRKY63	628	654	light responsive element
LsWRKY64	779	805	light responsive element
LsWRKY64	947	973	light responsive element
LsWRKY64	227	254	light responsive element
LsWRKY65	1126	1153	light responsive element
LsWRKY65	1930	1956	light responsive element
LsWRKY66	881	908	light responsive element
LsWRKY67	1665	1691	light responsive element
LsWRKY68	162	189	light responsive element
LsWRKY68	818	847	light responsive element
LsWRKY68	1645	1671	light responsive element
LsWRKY68	1646	1672	light responsive element
LsWRKY70	57	84	light responsive element
LsWRKY70	577	604	light responsive element
LsWRKY72	581	607	light responsive element
LsWRKY72	1326	1352	light responsive element
LsWRKY74	856	882	light responsive element
LsWRKY75	1047	1073	light responsive element
LsWRKY75	1048	1074	light responsive element
LsWRKY75	1292	1318	light responsive element
LsWRKY05	132	158	plant growth and development
LsWRKY05	1964	1990	plant growth and development
LsWRKY06	1313	1339	plant growth and development
LsWRKY07	1591	1617	plant growth and development
LsWRKY09	786	812	plant growth and development
LsWRKY09	1909	1940	plant growth and development
LsWRKY12	1868	1894	plant growth and development
LsWRKY14	281	307	plant growth and development
LsWRKY15	657	683	plant growth and development
LsWRKY15	1870	1896	plant growth and development
LsWRKY17	295	321	plant growth and development
LsWRKY17	355	381	plant growth and development
LsWRKY21	469	495	plant growth and development
LsWRKY22	910	936	plant growth and development
LsWRKY22	1203	1231	plant growth and development
LsWRKY24	921	947	plant growth and development
LsWRKY29	677	703	plant growth and development
LsWRKY31	395	421	plant growth and development
LsWRKY37	1631	1659	plant growth and development
LsWRKY39	1155	1181	plant growth and development
LsWRKY42	230	256	plant growth and development
LsWRKY44	779	807	plant growth and development
LsWRKY44	79	107	plant growth and development
LsWRKY45	869	895	plant growth and development
LsWRKY49	285	313	plant growth and development
LsWRKY54	602	628	plant growth and development
LsWRKY57	880	906	plant growth and development
LsWRKY57	369	395	plant growth and development
LsWRKY61	384	410	plant growth and development
LsWRKY64	610	636	plant growth and development
LsWRKY71	1438	1464	plant growth and development
LsWRKY72	1165	1196	plant growth and development
LsWRKY72	1449	1475	plant growth and development
LsWRKY73	1114	1134	plant growth and development
LsWRKY73	1833	1853	plant growth and development
LsWRKY74	1418	1438	plant growth and development
LsWRKY74	627	647	plant growth and development

## Sheet: Table S7
Table S7 Amino acids of 76 WRKY transcription factors in lettuce.
Number	#GeneID	amino acid sequence
>LsWRKY01	>Lsat_1_v5_gn_0_15201	MDDQHSPHSHSSTTATSNVDVTGHRRQGGGDVFGLRSAGAGGGAKYKLMSPAKLPISRSNSINVPPGLSPTSFLESPVLLTNMKAEPSPTTGSFFNSSLMQRSITTAAFSLDANCSSRKPLDDSNSGFFEFKPHTQITSVPQSSSAGYQVSTGSNLQRGEPSGQYQNQSEPQSYASASSSAYMSHEETNGLGKHKDAGPTIQVDRSSDDGYNWRKYGQKVVKGSEHPRSYYKCTHPNCEVKKIFERSYTGQITEIVYKGTHDHPKPQPSRRFSAGALMSIQEENLDKLQYANYQPGMSANNVQNPNLDDSGTPVQSPKYANQENTDGIDDEDDPYSKKRRTDFGALDVTPVVKPIREPRVVVQTTSEVDILDDGYRWRKYGQKVVRGNPNPRSYYKCTS…
>LsWRKY02	>Lsat_1_v5_gn_0_3061.1	MNFNCFKTSYVDTKLTTAFDHNLWSNALFIPETTSSDVIDHRNQSNVMINHMAYQVDEDDDIIGKPWLLEGGNVLVESPEVVGVGCDTKIEMKAKNPKIAFQTRSQVDILDDGYKWRKYGQKVVKNNKFARNYYKCNYKGCNVKKQVQRLSKDEGVVVTTYEGFHAHTIPMPPQDINHISS*
>LsWRKY03	>Lsat_1_v5_gn_1_22221.1	MAVELMNSIRINSFNGKMEEIAVREAGAAGLKSLENLIGLLSSQSHHEPSYSAGTSDASSTTDYVAVADVAVTRFKKFISLLDRTSTGHARFRRGPVSNPPVVLEKKSAFTPTAGNSSQQYNQTVVAAAEKVNSSTAPIQQRFPQIHLAKSGSFDRKDVPTNTINFAAAAASPANSFMSSLTGDTDGLQPSMSSGFQITNLSQVSSAGQPNMSTSSFKRKCNSVDDSHTKCTNSSGRCHCSKKRKSRMKRVVRVPAISMKMADIPPDDYSWRKYGQKPIKGSPHPRGYYKCSSLRGCPARKHVERALDDPTMLIVTYESEHNHSLNVKDSSATIIFESS*
>LsWRKY04	>Lsat_1_v5_gn_1_80260.1	MYHHYCGSNVIVSGGCFVLLSHWMFGMNEMEGGDHVKITISVTKQHQLAKELGVKLVYDDGNNDEEEDALGYYKSWNHIIGGDLSAFQTTTGVYLLNIEGFTRHGIEVDPCYHGLIERSTRYKEEQVYFRALSQRKFGKICQTHKILPSPSTGSFSFHAFNWQNLSSNIQNHEQSIKKEQKSFTDFSFQQPSNHQTEQLWNQQKPREQDEKTFVQSEHPSQFQNFSEEISTIQTDSNSQMQSSQLGYAGSNINFENQSSQIKTDDGYRWRKYGQRKGNNNRSYYKCVSSNCKVKKTIETNFDGQITKIAYTGSHNHPKFQSTRISSASNHSQMAQASSNHEFDKLYYDYHGSGQFDSVASLENSSIYYDLDRSSSGRLKYDGMPDSKNGFISDGSSGGD…
>LsWRKY05	>Lsat_1_v5_gn_1_82341.1	MEGSERGLANFDLQVSSFQNPIHDHIGFAHFQDHHHNHDPHQTQVLRFLPPTLSLPQLSQPPHHTTTTTSAEAADFHREAPSVHRDSWHKEQVGSLDPKSVNEEKCADDNTSWWRSSSNPEKGRTKMRRKLREPRFCFQTRSDVDVLDDGYKWRKYGQKVVKNSLHPRSYYRCTHSNCRVKKRVERLSEDCRMVITTYEGRHNHSPCDDSNSSEHECFTSF*
>LsWRKY06	>Lsat_1_v5_gn_2_110080.1	MEVKEAKRTIIAKPVASRPTISNFGSFSDILPGAINISPSTEPTVTAIRPKTLRFKPVMSSPNVEILKSDHTSPFLYNPLAKTVSRTTISLLANMGTCNTSHVQTATQNLESMNPPKLKSDDKRLQSHTNNSDRPSYDGYNWRKYGQKQVKGSEFPRSYYKCTHPNCVVKKKVERSINGEIAETVYKGEHNHTKPRLPRRHAFDGTIKDSSSQLPSNQLKNDNKLNEVVGSSLRLTNVVKVHEEFDASCMPTLEPITSKRRKITSERYGEGLKEGGVVVHDGIDSEAIADGFRWRKYGQKVVKGNPYPRSYYRCTGVKCDVRKHVERASDDPNVFITTYEGKHNHEMPMKKLN*
>LsWRKY07	>Lsat_1_v5_gn_2_126380.1	MHLNPNLFTTIFVAYNPPRFSYRSHQHHIHTLDHHNSKKRTQKSAMEEIVSLIFHGRKLVKDLEEALPNIPNQPYLLISLCDEISRVFGDARERLSLVVQEYGHHEPPPTMEVGGGSGSMPEWLRSSHATDMVLPEQLVQLHHGLEAIANQELGGGNVEAQGTDVGHSSLPRTRRRKHEADRRTFRIPAPRMGNTEVPPEDGYTWRKYGQKEILGSRFPRGYYRCTHQKLYNCPAKKQVQKLDNDPNTFEVTYRGDHTCIMSSTAPSMPPLPSAAAEAVPIQSLPSHHDHLPPSSSQTPQWLSMDIKQSVGDLYSITHRHHGMQTYRNQSADIGGEAAGPSSPTTRYVEYGTGMTDLDLVDTMFNSGSSSNNSMELIFPQKEETKDGGDKTN*
>LsWRKY08	>Lsat_1_v5_gn_2_126880.1	MEKNKKRLNETLIKGEDSAKKLQALLCRRAYNDGSVSVEDLVMEILGSFSRGLSMLRSCDSGEFAGAPASPDMTLATSGDQTPEVKNRKKPAPALKERRGCYKRRRTIDSRVITSVTIEDGYAWRKYGQKMILNSQSPRCYYRCTHKPDHGCKAQKQVQKLEDESNMYHITYFGHHTCPTLNNFSHSGVVLDFNGGASKNPHSLSNSPSAITNFQVQPSIKQEVESKTQSTDVSVSDNVSSANDGYSHNSSPALEWNEIWQHNQLGSSGHEGPPFMWFDNEDSCASTSSHGYLDMDFLNNDGFSSDFLFDEVLS*
>LsWRKY09	>Lsat_1_v5_gn_2_126920.1	MDESKEKVVEILIRGRNYAKMLQNLLRRKVDNDGSVSVDNIMMEIMKSFVDSLLVLNSFHTGKFCRVPVSPHMGLACSLDWVPKFCSEETGKDLTLGVRKRRGSYKRRTIDSRVKTSCTIEDGYSWRKYGQKEILNSKFPRCYFRCTHKHVLGCKALKQVQKLEDETNMLHITYFGYHTCSPSNTFSHHGGVLDRKDSKIYHNLLDNPLTITNVQTNPSLEKDPSSPKDTESLTTLVWKEIMINDLECFKNYGILSDIPFANVFLS*
>LsWRKY10	>Lsat_1_v5_gn_2_131480.1	MDGEWDLHAVVRSCATTTTADVKNTTVEDYDDGSYNLESLASGNEERNTFVYPSFANVSGGLEDVYKAGCGQPAGAKPATSAAIDLDIVEGFVHEQLPMLTDSHSFSMHTMSSQSTRTRKRKNQEKRVFQLTQEELSNDAWAWRKYGQKPIKGSPFPRCSTTKACGAKKQVERSPVDATIFIVSYSGEHIHPRPTHRSSLAGSTRSNKFNTDKPPVSGNTSSAVLEHPPCSSSSPAYASNFSPTTSSKEDECEINEENEYDEDILIPNTVMNDEILKRFRDLSGGGGSSGGGGNF*
>LsWRKY11	>Lsat_1_v5_gn_3_11440.1	MEGDEHSSQTPQPPMNDNNVNMNNINPYLLDYTPLINNPFQYPSSSPLLPQPLPVAHNLDNNIRLESSNVDWVSLLSGYMNGEGSMARGLCEGDENNAGRNSKAMKSGRGKKVTPSRVAFHTRSSEDILDDGYKWRKYGQKSVKNSHHPRCTHHTCNVKKQIQRLSKDNSIVVTTYEGIHNHPCEKLMETLTPLLKQLQFLARF*
>LsWRKY12	>Lsat_1_v5_gn_3_139241.1	TYRGRHTCMQATQLSKALEKTPKQEQENIHVEKPTQKTHMERGFSFKSSKGMNTCEDGLFPSFKFDSTPIETEKLENLFYLGCDSTAFIAFNHNLHNSDSDVSEMMNSTPNSGSNSPMMDMGFSLDYVDFDGDILFDITDLEKFV*
>LsWRKY13	>Lsat_1_v5_gn_3_25221.1	MVASSFAIDLNLFPFHKTDDTPIREVHTDDDYDDDDDDGEEEDDCSFGKEVDDHMISGDHLSRINNENKKLKEMLKIVWENYNSLQTHVKKLMQEKQVPESNPKKRKLDETVQQSLWKRQNWNLESPRNTGVQRVYIPTDPSDKSLVVKDGYQWRKYGQKVTRDNPSPRAYYKCSSSPTCPVKKKVQRSVDDPGVVVATYEGEHNHRSTKEEAAYALANEHKISSSERRSNSPRFDEVLVEKMATFLGKDPDFTAELAAAISSKILEVDLF*
>LsWRKY14	>Lsat_1_v5_gn_3_31320.1	MNNNSDPVFSYSSSSPSSSAAAVNSSYLTLNMVNNNPADYNNYHEQMGLMEKDLQKYENSEEMVGGHHVSPSSSSLAHGDGSQLIMAAAAGKTNIRKGEKKIRKPKHAFQTRSQVDILDDGYRWRKYGQKAVKNNKFPRNYYRCTHQGCNVKKQVQRLSNDDGIVVTTYEGTHSHPIEKSTDNFEHILTQMQIYSR*
>LsWRKY15	>Lsat_1_v5_gn_3_51361.1	MAASSSMEKSMFSFFKVNEEHDDQTIVSKTSAQDVEMGQVRQENQKLKHTLSMVLKDYNSLQTHYNDFFQQEIPKNTKNLVTNQEGDHGNELISLSLGTLSSYKQKDSQQKVNCFSKTKDGGDEQELKLGLGCEFDMKKDEKTQNLEPPVHNLKSERREDNDLLDQIPLKKARVSVKVVCDTQTMNDGCQWRKYGQKIAKGNPCPRAYYRCTVSSSCPVRKHVQRCAEDRSVLITTYEGTHNHPLSVSATAMASTTSAAASMLKSTSSTSQPGLTTTATSTSSSTATFSGHHGTTYNSRPPHQYPFYLPNTTISTYQSHPTITLDLTTNPHFYKSTSSNFLRTQPRFSSSSCLNFSSPTSSSSSSMESNYKNPINFSYLGRQTSYETLYQNPSNDNFQS…
>LsWRKY16	>Lsat_1_v5_gn_3_8741.1	MADWALQAVIRPKQYDDDYFGSIDTKKEYDQALLFCFPHLFDHQASTPSMETVVVGDEVEQLYKPLYPIFGTEIELPPPPPPAGAADADLQVIHHHHHHHDSYHEVQQDQEQADIKTYCGSASKISQLAPKLKKRKNQQKRVVVQVTADGLSSDPWAWRKYGQKPIKGSIYPRSYYRCSSSKGCMARRQVEQSCTDPSIYILTYTAEHNHPQPTRRNSLAGINRNKFKTTPKSPTISDGCKSVPITMDSPFNSPTTPSVSSNDEEVLQQSNIKQETMFYSNFDDQGHTMMTGMNDEDHMVFSDDFFEGLEDLSSYNCSNRQFPHVFS*
>LsWRKY17	>Lsat_1_v5_gn_3_98441.1	MAETGGDSAPPPRRIPPMITLPPRSSSDTFLTGISPGPMTLVSNFFSDHYPDTDIYSLSQLLAGVLPSPAAENSPAPPLYNDYLSLLSPEESRTSQTSDPYVDNSSQIRSPETVSDSESGDSKPERVVALAKPASDGYNWRKYGQKQVKASELPRSYYRCTQVNCPVTKKIGHFLDGNTSEIIYSGRHNHEPPQLHKPAVVADEQAYELMPKRRQISIVLESFFLYMITKGHVKVESLVIDCRKTEVKCVDRSSSCRVVVTEPKIVVQTRSEIDILDDGFKWRKYGQKVVKGNIYPRSYYRCTYVGCKVRKHVERALSDLKSVVTTYEGRHKHDIPVVVKPSSNNEINFKAEIPFLLQLKEEKIMI*
>LsWRKY18	>Lsat_1_v5_gn_4_10320.1	MDEIRRLISSSASFLPPNISIPATSTVENLFANGSGGGVGESPGPMTLISNFLSENDREADYHSFSQLLAGTMSSSVEIQGRIPPRDLDAGVSFPENIGGCGGVGRGVDFSPGYFPPAKGSYGTFHQQALAQAKTKATTHHRLPPSMADQYVIRPELSISGSHSQPLTADKPAEDGYNWRKYGQKQVKGSDYPRSYYRCTHQRCLVKKKVERSTDGLVTEIIYKGQHNHQPPRSIGTSGEFEPFKGREDQESSHEQSGLNDSDGASDDVAKPQTKKRNVEAREFDPVASHQKVMEPRIVVQATSEIDLLDDGYKWRKYGQKVVKGNSHPRSYYCTSKGCKVRKHVERAANDPKAVITTYEGKHNHYVLANGKNNCELTKETTSQLKAQDPVGLLRLKDE…
>LsWRKY19	>Lsat_1_v5_gn_4_1201.1	MDNLAAMFHYSSSSTSTSPAAALSSQLSLNMTNHYSHADHNYNNRYSSYTQSDDDHELRLIGENKKGPSDNAVVADRISPSSNSFSTGDGDDLNTSMASTKLNVRKGEKKIRKPKFAFQTRSQVDILDDGYRWRKYGQKAVKNNKFPRSYYRCTQQGCNVKKQVQRLSKDEGVVVTTYEGIHTHPIEKSTDNFEHILTQMQIYSSC*
>LsWRKY20	>Lsat_1_v5_gn_4_12300.1	MDDKDKVDQISGGFSSDPTWTFQGDYSFFGSDVRENSVLSEFGWSFQPPPAAFDRIDSDVSLPEVGVGGVVGSDQVQTGSVDDQAAGDVSMSTPMVSSSSSEDRAETSTASGGAASGGKPPSSERASKVKKKGPKKIRQPRFAFMTKSEIDHLEDGYRWRKYGQKAVKNSPYPRSYYRCTNSKCTVKKRVERSSDDPTIVITTYEGQHCHHTVGFPRGLMTHHETAYARQLAPTSSALQPLNYSRPHFPNLVDVVRASQSRPQLLLSNESKDHNIPHKLPQSSSQDSHVDQGLLGDIVPPRMRNQ*
>LsWRKY21	>Lsat_1_v5_gn_4_127960	MAVDLMNAYRTTALHNKIEENSVQEAAAAGLQSVENFIRLLSSSSQSYQSNTNTTSSSSSSPPAGATDSSATTDYVAVVDVAVTKFKKFISLLDRNRTGHARFRRGPVSVSVSNSNPPEKISPLVPAPASVPHQKLYSPAPIQQRMPPVPQSTLHHPLAISGSFDRKDFPVTTISFAAPPPPASQVNSFRSTLTGDTDSLQPSMSSGFQITNMSQASSGCQPNLSSSSFKRKCNSMDDSHTKCANSSGRCHCSKKRKSRMRKQIRVPAISMKMADIPPDDYSWRKYGQKPIKGSPHPRGYYKCSSLRGCPARKHVERALDDASMLIVTYEGEHNHSHNVNDTPGAIVLESS*
>LsWRKY22	>Lsat_1_v5_gn_4_138020.1	MLNQGFLEDQQISFFPFPANMISLPNQNLKTLSPSYHLPQHSKPEQHLTSHFGLPLQSSNANYWAWGEVGEIISNKILGMGRDDHHHHLGVSGMKMKKMKSRRKVREPRFCFKTMSDVDVLDDGYKWRKYGQKVVKNTQHPRSYYRCTQDNCRVKKRVERLAEDPRMVITTYEGRHAHSPSQNEEDSEANTAKLCNFWL*
>LsWRKY23	>Lsat_1_v5_gn_4_164440.1	MAAVDLIMGFRNTTSDETNAVQEAASGLESVQKLIRLLSQSQSQQQNQSPADYKAVADVAVTKFKRVISLLGRPSRELTGHARFRRAPVNHGGYLNHNQTIMKDHDQDDVVSDEGENKVYCPTPIQQVPFVPPPPPAAPATGNQPAVFQRKDSLPKTISFSYSPAVSRASSFMSSLTGDSDGKQLSAGGKPPLCSSSCLKRKCSSSENGASGKCSGGSTGRCHCSKRRKLRMKRVIRVKAISMKLADIPPDDYSWRKYGQKPIKGSPHPRGYYKCSSVRGCPARKHVERALDDPSMLIVTYEGDHNHALSVAETSGLILESS*
>LsWRKY24	>Lsat_1_v5_gn_4_169921.3	MRRLQPQPQSPPPPQSSNLLYSRKIVMAETNGGSAAAAPPPQQQRRVPPMIALPPQTSFETLFTGGPGPGFSPGPMTLISNFFSDHNTDIDCRSFSQLLAGAMASPASQIPPTSMFDDCSSSKQPDSEKKQGGFKQNRPMDLVIAQSPSGFMFPSTFSPSGLLNSPGFFSPLQSPFGMSHQQALAHVTAQAALSQSYFNQIQPENQNKSSQSHEEPQIVNTKSDLSDSQIGSPDDVSFSQSDISEPRHVITAPTDTNDGYNWRKYGQKQVKASEHPRSYYKCTHANCPVKKKVGQSFDGHISDIVYKGQHNHDPPLVNKRGKESADVSKPNNYQFETRVVEAAAQPARDIPRSNELIRIDESDDEPNPKRRNTEVGPVAAPVESNFSHNKMVAEPKIVV…
>LsWRKY25	>Lsat_1_v5_gn_4_35321.3	MDADWDLHAVVRGCYSAVSSSSSTTTTAAATLNWPVDAYNQQKPTFYGENLMGFSSDLFQPRNENSIEQFLNNLYNPLHFSNLQKPPPSPQNFPISPLSVLGGLPDPPYHHYHHHQQEKQFQGKQQSLSITRCTNSHAQGTTKFKKRKNQIKKVCQVPAEGSSSDLWSWRKYGQKPIKGSPYPRGYYRCSTSKGCMARKQVERNRSDPGMLIITYTGEHSHPTPTQRNSLAGSSRNKPTTSSDDDNINKHTPTSPVSPTMEKMEEIERDDTDDDNNFDAAGVVIDDDIFDGLDELIGPATGDSFSTSKTGAPFRGCQITWPPQPPPLPAGTSEPLAKWKRSFV*
>LsWRKY26	>Lsat_1_v5_gn_4_48480.1	MEDHEEHDNSPENSGESPTSDMFNDMKTTSTSSTLKRSRRSIQKRVVSVPLRDIEGSRLKSETNAPPSDSWAWRKYGQKPIKGSPYPRGYYRCSSSKGCPARKQVERSRTDPTMVMVTYACEHNHPWPASRNNNHHHHHYNSAASPPPAASTTTTTTTEETVSNSDDQEEDPPLITKQSISEPDEKFTSTLDQVVTGGPFVTSSDQFGWCYDLESTTSTMLESPLMAGDIVGDADMAMIFSIREEDESLFADLGELPECTTVFRRREIINEEEHHHRRPCNLAPWIRYF*
>LsWRKY27	>Lsat_1_v5_gn_4_61461.1	MGKAGWGLTLDTSEPLELLSPRWNFPVKPAMFSGVSPKMTDEKNSNRKVLSEVDFFSTSKSNDDQIVVKKENISHATELDVNTGLHLHTTNSDQSSVDDGVSSSGDDKQAKNKLTILQVELEKMNTENQRLRGMLSQVSNNYTALQMHIANEIQKQQNSSKQIVLQDQKPVPQQLNHLPPTSHDSSSSEERTQSGSTLNAIELSKNGKRTGRENTPDSDTWVSNKIPKLNTTKNIEQANDPTMRKARVSVRARSEAPMITDGCQWRKYGQKMAKGNPCPRAYYRCTMAVGCPVRKQVQRCVDDQTILITTYEGTHNHPLPPAALAMASTTSAAASMLLSGSISSADGLMNQNVLARSILPNASSIATISASAPFPTITLDLTHNPNQYQRINNSNQFQV…
>LsWRKY28	>Lsat_1_v5_gn_4_86881.3	LSFHSVLQFNSLLLFLSLFSLQLLQDQSILQQEFSFKNLSMEYTSLVDTSLDLNSNPSHFLSLVPKQEVQSSFNIELGLKMSSVNDQDASELVEELNRVSAENKKLTEMLTVMCENYNALQNHLADYISKNPAPSDSATNNNPNKRKPENPVNQIINNERGNSESSSSDEDSCKKPRQEQNLKAKISRVCVRTEASDTGLLVKDGYQWRKYGQKVTRDNPSPRAYFKCSHAPTCPVKKKVQRSVEDQSILVATYEGEHNHPNQAKNEQAGSCLSRTVATTTLGSVPCSASLSSSGPTITLDLTKPVSNASDEQKVGGNRRVDTPEFQQFLVDQMASSLTKDPSFKAALAAAISGRMVQQNQSQKW*
>LsWRKY29	>Lsat_1_v5_gn_5_107761.1	MGREEENTDMEIDLTLKLDAQDQEPVRDSSESYHQDQVNEDDDDRQVPSPEHQVQHSELDVQTGTDPTEAPKKQDLDHRNEEKIEMNRMKEENKVLRQVVEQTMKDYYDLQMKFSVVRQSSSQFKDPKAFLSLNGHDKDQDIKKISPRSSPLQESENENLGLSLRIQGNTTTSPHARDHQEGNHKDLSETTTKFMPMQQDNLMNSGNFGGENKASNIANNPMASLPNRKARVSVRARCESATMNDGCQWRKYGQKIAKGNPCPRAYYRCTVAPGCPVRKQVQRCLEDMSILITTYEGNHNHPLPVGATAMASTTSAASTSFMLMDSNNHISSELRAMNQQPFANYHMSSNILNSNSSPYSSAHMTPNDPTKGLVFDLTNNPLNPHHSPSSQLGFPWMPN…
>LsWRKY30	>Lsat_1_v5_gn_5_122901.1	MDNTSNNLQLTVVPESKEQPSLSNQERNPEPIHDMHQSPSSDSGTHVSNSNQEPPVTPKKASSNTSQQTPPPPGSISEADQENYIVAIRPEKGLDKLPLRRNIDNLTPTQSDQGITFSKLPEKPTGDGYNWRKYGQKLVKGNTFVRSYYKCTFGNCPARKQVEHSHDGHITEINYLWKHEHPKPINTLVKGSAFVLPIQSKASDDLSLVTSEDHSSVHPAASHEPETNQLQLVPVPDNSQELAVSRSEGNNDISSESKRQKRENEGISTKTNCEPRVVVHTTSAVDIVNDGYRWRKYGQKLVKGNVNPRSYYRCSSAGCPAKKHVERAAHDEKVVITTYEGRHDHDLPAGGRNVTPNISGIGTGTGNADSNDGSRPQPVESGAN*
>LsWRKY31	>Lsat_1_v5_gn_5_124140.1	MSTPSTGISFDSDRITSDHRHHHQLEFMDSTRHNRSSSSHSPPPTTIHFPVNYLDPDPYKSDDKRINEVDFFNDTKHYPKSIDFDLNCKEEITKPAIDLDFNVNTRLNLLTGNTSSDQSVIDDGISPSYEDKRANHELVSAQAKLKRMNGENQRLREALNQVIYNYNALENHLAMMIHQKQRGENPNGEGSRRQVMDLALTHPAKAETDKNLQLSTSEERNNDEQSMRPILNNQNTGNIDQSSEAPIRKARVSVRARSEASVIADGCQWRKYGQKIAKGNPCPRAYYRCTMAAGCLVRKQVQRCAQDRSILITTYEGNHNHPLPPAAMAMASTTSSAAGMLLSGSMPSSDGYLGRNLLPFSSSMATISASAPFPTITLDLTQTQNPLQFQEPFSNPNHL…
>LsWRKY32	>Lsat_1_v5_gn_5_173860.1	MSSSGISFESPSNSPPSPPPPSTTAVPPAAGVPKFKSTPPPLLPITPPAFSPSSYFSFTGALTSADLLDSPLLLSSSHILPSPTTGSFPLQASNWTSNYQSQEHGIKKEHDNFTDFPFQTQSNPNTVSFQEIYQQPRIEDDRSLVKSEYSFQKQSFESNYPTNRNIYNHRSSQKKLDDGYNWRKYGQKQVKGSENPRSYYKCSDRNCSMRKKVETSSDGDITEIVYKGNHNHPKPQSTKRSSSSSVSNNSLVMNQFNDFQDQSHGSGQWELIGTPENSSVSIGDDEFDRSTSGGDEFIENETPAKRLKIESENEGISRTVRESRVVVQTISDIDILDDGYRWRKYGQKVVKGNPNPRSYYKCTTPNCSVRKHVERASHDMRSVITTYEGKHNHDVSPAR…
>LsWRKY33	>Lsat_1_v5_gn_5_18720.1	MEVDHRKTTQMKQEDKGDDRHCKQEVVDDKEDEKQFELTKTEMGEVREENQRLRLHLDQIMKDYQNLQKKFQDILHQQQETTSSTPHVAPTNEQPQINDESELVSLSLGRTSSTELVKKDKIRSTTPPTKNAEGLGLGLEYGKFELSSTTQTESSVNPSPENSLDQEAKDEAGETWTPQKPSTPKRSADDQDVQQNPAKKTRVSVRVRCDTPTMNDGCQWRKYGQKIAKGNPCPRAYYRCTVSPTCPVRKQVQRCPQDMSILITTYEGTHNHPLAASATAMASTTSAAASMLTSGSSTSGANSNPNTVTTSHGLNFYLNENSKLQPIYLPHSSISPSPSCPTVTLDLTSNTLSTSSPYSYRSPPMATTFPPRYSTTNLNFSSLESNALPISWSNGHLNY…
>LsWRKY34	>Lsat_1_v5_gn_5_62060.1	MDETFLGIDLNVSPYYKTDDTPMNDDMPEELNQMRLKNKKLREMITVVLENSNSLQNHVNKLMQEHDLVASNTNKRKFSECDDRNSFESRKSLHQESLKSRNDGVTKVYRRTDPSDKSMIIKDGYQWRKYGQKVTRDNPCPRAYYKCSFAPSCPVKKKVQRSVDDEGLLVAIYDGEHNHENVESEHKLASYERFKSPKEVGSFDAIFVEQMANSLRKNSDFIEELAVAISSKILQHDVF*
>LsWRKY35	>Lsat_1_v5_gn_5_84140.1	MAVELVGIQTVEHLNRIFQLQNHDYAASSSFKQAVSALKRSGHARFRRGPSSSDPHAPSISSQSEEKLPIEPPLRESTASEKFDLKRSGTDTTSSFLSITSSVAGGSLEGSVSDGKQLSSLGIVAPTLSFSSRKPPLPSSHRKRPSTDRPSGSLQGSGRENNSVSRSGCHCCKRRKTGSKREVRRIPIIGSKVESIPADDYSWKKYGEKKIEGLPFPRVYYKCNTVKGCPARKRIELSLTDSKMLLVTYDREHRHHHTPTPVPASFSGLKIH*
>LsWRKY36	>Lsat_1_v5_gn_6_115920.1	MANLASLDQIPSVCGGGGGGFLDTPQAYGLDMLAFHDYGGASLFDMLQQPTPPQSLMVKSAPQASTMLETSEVVNTPPTNSSSLSSSSNEPVNDVDQENNTRSDDDQEKNANKQLKPKKKNQKKQKGPRFAFMTKTEVDHLDDGYRWRKYGQKAVKNSPFPRSYYRCTSASCGVKKRVERLTEDPAVVVTTYEGIHIHPCPVTPRGMLPETATYGGLGGGGGSSYILPPFHYQQPLRPFFHNQTNSLSFNNTTTPSSYSHYLQERQFCPPSMTSSLHRDQGLLQDMVSFQIRKEEPKVEPS*
>LsWRKY37	>Lsat_1_v5_gn_6_12161.1	MESACVHEQTTVVHELTQGIEMAKQLRLNLDSAEAREFLIEKILSSYDKALFVLKSAGQPRASPLPESSLPKSSITTSSPQSTEYEFEFGQNVASKKRKASTPWDNEVKILSDNEIEGNANDGYSWRKYGQKDILGAKFPRSYYKCSYRKVQKCLATKQVQKTDEDPTVFEITYRGIHTCNGVAQSALPPPPSPEKHEIKPTHHHHQLTTPNAGENFSNPRANLTVNTWDLGCTLPSSHSIPPTVFEFNDNDFHPLNFPNHFDEELLQGYSPSFISPATSESNYFTDWASSSSLDLPKDAADLFPDFMS*
>LsWRKY38	>Lsat_1_v5_gn_6_220.3	MDKKEELKNNAENSNLMANSTFSDQIPAVYGGGGGGSGFFDIPQGYLDMMSFQDYGGASLFDLLQQPTPPNLVVEKPQIHPPSTLESPSLPPPVSTVTETPEMVNTSTQNSSSISSSSNEAANNVDQENNRRSAQENDEEQHDDVEDDDQEKNTTNKQLKPKKKNPKKQREPRFAFMTKSDIDHLDDGYRWRKYGQKAVKNSPFPRSYHRCTSVACGVKKRVERSSDDPSIVITTYEGTHTHPYPMTPRGSIGILPESAGYGGLGGGDGLGVSSFLFAQPHYQQQQLQPYFHNQTSTSSSLSFSTTNSSAHPSSYSHFLQERRVFPSPSSSLLRDHGLLQDVVPFQIRKDEPKKEQN*
>LsWRKY39	>Lsat_1_v5_gn_6_84341.2	MENVYIINELTQGMELARQLKAILSSNCSPESKHNLIQGIIASYNRALLIINSAQSELPALAAQPVSVSVLSQPESPVSIDGSPQSGDFNQGFDNFQDQKIVSKKRKAMLTWKNQIRISTDNGLEGNSDDGYSWRKYGQKDILGAKFPRSYYRCTYRYVHNCMARKQVQRTDEDPTVFEITYRGKHSCNNSATTATTAAQSVVPPQSPENHQPPPPKSGEMLSNLRENLRVSTSDLDAMVPCSFSFPSSSFGCIENYQQFHFTSEADHNFSQAANSGSNYFPEWNHEFHHHDDSNLSGIISATTSATNSPLAFTDSHDFNPNFPFNNSDSIKSINYVKHTK*
>LsWRKY40	>Lsat_1_v5_gn_7_111140.1	MEARCENMVLNSFDGHKFPINRHENRSAIINEVDFFSRSSTTGNSSQLHPSSIHHAIENKEHDRVNQELQLNLNVGSNLNTINTKNQDAHKLAILQNELEKMKRENESLRSMLAQIKEKYSFLQRHIKTINKVEDDTLEFKKLTPPLMKIDPNVDSSDMNKDVKLNSPKDICDQGATAETTMRRARVSVRVRSEASMISDGCQWRKYGQKMAKGNPCPRAYYRCTMVVGCPVRKQVQRSMDDQTILITTYEGTHNHPLPQTAMAMASTTSAAASMLLSGSVSSSNHHNHNLIVGSMLSSYHPNITTTLSATTPFPSITLDLTNPSSNHLQQPPFHFPFSTNTNPNFSLPNKPSLLAQLDAQQYSVRKFSGIPNSDQELMDAATAAVTTNPHFMAAXVIG…
>LsWRKY41	>Lsat_1_v5_gn_7_113921.1	MEDQDACNSSTNTNTGGGGGARYKLMSPAKLPISRSSCITIPPGLSPTSFLESPVLLTNVKAEPSPTTGSFFKSQPVQRLSSSAAFSLNGNYSGSKSLDDSNCSFFEFKPQTGSSSLGLEVSAGYNIQRSSVPNKDRSQYQLYAAPNEEETLANGVEGEGHKVAGDDHDGYNWRKYGQKVVKGSEFPRSYYKCTHPNCEVKKIFERSCYTGKITEIVYKGTHDHPKPQPTRRLNPSSILIQEEDHHNATDKVSSMAITGQPQPAKANNNNNNNNNSDTSGTQVDENNTRDEDDEDDDPYPKRRRMDYDVTPVVKPIREPRVVVQTISEVDILDDGYRWRKYGQKVVRGNPNPRSYYKCTSGGCQVRKHVERASHDPKAVITTYEGKHDHDVPIARNGSH…
>LsWRKY42	>Lsat_1_v5_gn_7_115881.3	MGGFDDHGGIIGDWMPPSPSPRSFFAAMLGDDPGSRSVPDPPKHDTNNDTGFTFPGPNPQIGSENGDATKSSEFGDQKTSSRAPLVERMAARAGHNAPRLNTEIIKSSDNSQTQQSPYLFSPGVSPTSFLESPVFLSNSLVQPSPTTGKFQFVPNGNGRSSMMFLDSSNRVKENFFEDTNNTSFAFKPFPDSAPVSRDHVNPPFMSTQSFQHNETLVQSERQFPPQKIEPTQNETSSLHIRSGFLNGSSERSQEHHEDDADQRINGDIGNNSNSASSEDGYNWRKYGQKQVKGSEYPRSYYKCTHLNCPVKKKVERSHEGHITEIIYKGAHNHPKLGPTKRSGLGCSNMLSDMQGDGNDQGGNGGQWGQEGNYEVTSSGMAMQGQNGHFESSDAVDGSS…
>LsWRKY43	>Lsat_1_v5_gn_7_15520.1	MGNFTLDTSEPLVLFNKTSRWNPFSMVPGGAAADVVAEGQDNRRNVLSEMDLFSTRNHSHNRVVVKKENFLGNDLDLNTGLNLVTMVSNRSKMGDDISTTGEDQTIDKLKDIQNELERMNIENQRLREMCLQVSNNYNALQTHFVTLMHQQEQEMRNENIQNLDQNANDHLSHDQVSVAVPRQFMELRQSTHDHLISRDSSSEEKTIDRDTKTIAREDTPDSDVWTSNKVPKLVVPENIEHTNDPTMRKVRVSVRARSEAPMISDGCQWRKYGQKMAKGNPCPRAYYRCTMAVGCPVRKQVQRWADDQTILVTTYEGTHNHPLPPAAVAMASTTSAAATMLLSGSTSSVDGFMNSNLLAQAIRPPNIATISASAPFPTITLDLTHPPNSTPIFEGYNNP…
>LsWRKY44	>Lsat_1_v5_gn_7_25760.1	MEVGFHPFTLHQEDNQNSPENSDESPPSPLFYDTKATSTSSPKRSRRGTHKRVVQVPIKDVEGSRLKGETNAPPSDSWAWRKYGQKPIKGSPYPRGYYRCSSSKGCPARKQVERSRTDPTMVMVTYSCEHNHAWPASRNHNHHPHQNPPPASPPSASTPTTEAETSNTDDRIEEETPILITQSEPDQLEPEQKFSSLDVGSCGPFITDQYGWFSDLDSTSSTMLESPLMTRDVVEDSDMAMIFSIREDEESFFADLGELPECTTVFRRREIERVEEHSRNLAPWCGSTG*
>LsWRKY45	>Lsat_1_v5_gn_7_29520.1	MENNYLGDLADIFRPGSVNSGDPPGVSDWQYFDQSDQEPQMIQKSTRIHDQAGFGQPFTSLLADPLVHEGTSIPCFFGNSLDEIEQPTPATRTHLGFDDHKIKDNHNHNHNHNIFSKMLQISPNAAKSTFSSNNDIITSSNSSSAAAAASSKRCLLETSSTTLQISSPRNPGIKRRKSQAKKVVCIPAPAPANSRPTGEVVPSDLWAWRKYGQKPIKGSPYPRGYYRCSSSKGCSARKQVERSRTDPNMLVITYTSEHNHPWPTQRNALAGSTRTPQPPKSTTTTEQPPQIETTEDEGSTLVGVRLEVKDELQVLEGSFPAQGYRPELPDQGGGGGGQPDDFFSGLGEIEVDPISMLLNQGFLGGEEEAENYNKDLDPFG*
>LsWRKY46	>Lsat_1_v5_gn_7_34280.1	MSEDQRDLYYHDPFHDDQRTSETLFSFFGPNSTVRDDSSPPNHQRFHDYMGLSHFFNGSTGYNTSTTTFGYSSSSSQQVFSLHDDQNPVPIPGNLIGVNEMTPVTPNSSSVRSSSTDAADEEHELNEGKKENQTKSIPEDVEDCPKKVSKQKKKEEKKQREPRFAFMTKSDIDHLEDGYRWRKYGQKAVKNSPYPRSYYRCTTQKCTVKKRVERSYQDPSTVITTYEGQHNHHLPATLRGNVGGMLYPPSMMVAQGAMMAGSGGGSSFPNEFLAQIPHGFYNSGGGGGGGGGGGGGGGLFNYNQTTLTPLQQLQIPDYGLLQDMVPSMTFKQEP*
>LsWRKY47	>Lsat_1_v5_gn_7_4000.3	MEVDWDLHAVVRACCSTAASSSSAASTATTSTATAGAPAWPVDAYNQQKSSFQDENFMGFFPDPFQRRNDNSIEQFLNDLNNPLDFPKLQKPPLSPQSLPISPLSVLGGLQDPPLQHHHHHHQQQQQQQQQQQQPKQLQEKQQSFGISRCTTSNAQSTRSKKRKNQMKRVCQVPAEGLSSDIWSWRKYGQKPIKGSPYPRGYYRCSTSKGCLARKQVERNRSDPDMFIVTYTGEHSHPVPTHRNSLAGSTRNKPTTSGDEDSTTKTNKQTSSPPVSPPASQSPTTEKAEDNDTDDDNFDMVMEDDFFEGLDELVGPVIPATSTPSPPFPWLSNNAANTSTTAAGEREKEGREIVKIGLCQDNL*
>LsWRKY48	>Lsat_1_v5_gn_7_49760.3	MKIRVLVIDHIRPVYLLVRPAYEAQLPDDACLSTLSVLARTPSVRGTKTLGTKSSKSPFKLASSHSNSADSAMDDDSDRSSEATELENLTTQRKRHSDTDDAEDSGTVNEDEFDDDETDDQREVSELDTSPMEIDAYSRTCQSETLVSGLAEVPIQYEMRRDELEHLKNQLQGSHQEALAIVIAKAAQSQSGSKIQIPIIPSLPSELSPISNIPKSNSQGEILSIEGNPIKSDHKTISTSRTVRTPIDGYNWRKYGQKQVKSPEGSRSYYKCTYNECEAKKIESCDQYNSITKIVYKGQHKHEQPKKVFTRRGKVLSSSKGQERKFTSKLCKSSGPVSNGPILVEEMDAPPPKRRQKNSMVSPGSVLKAAKKPKFVVHAAGDVGISADGYRWRKYGQKM…
>LsWRKY49	>Lsat_1_v5_gn_7_55280.1	MAVDCVGVQTVDNLNRMFHLTSHDFNVSSNYKQSVSGLKRTGHARFRRGPSSSSSTDSQGTSTSSQSEEKQQDAPLTASKACFLNKSVSDSEAEAVTSSRSTSSSSLVSSLAGGGLEEESVSNGKRFSSLGIVAPSLTFSSRKPPLPSTHRKRCSADNPAASLHRSGRENRSSGCYCCKRRKIGSKREIRRVPIIGSKVTSIPADDYSWKKYGEKKIDGSNYPRVYYKCNTGKGCPARKRVELALDDSKMLLVTYDGEHRHHHAPTPVPTSLTGLVVQSK*
>LsWRKY50	>Lsat_1_v5_gn_7_60801.3	MIYHQEQQTLNLHTKMNYYDHQMSKAYSYRSVDSPDMDYDVPNQQTYEFVESFLSFDDWITEDKASTVPEYQDHTPVYPSATIEDGGLSIGSSSSNSHLHDGSRSRATGFGQAQNGKKEKVAFKTKSQVEILDDGFKWRKYGKKMVKNSPNPRNYYRCSAAGCSVKKRVERDVEDARYVITTYEGIHNHQRPSNY*
>LsWRKY51	>Lsat_1_v5_gn_7_77361.2	MNINSSGNHHLKNNCLYNKLTKSTKQEKKLEIDLNLPASSNETEEVSTHIPNSDDEALSQYVGTTEIQRSLSGRPHNDDSDTKDSNHKDGSRKKKSNSSSIVKWKQQVKVSLEIGLEVPPNDGYMWRKYGQKEILNAKYPREYYRCTYRNTHGCCATKQVQRSSDDSSIFEITYLGKHTCPKISKTNHPSSTTESGYGLINFSNTSKTVSTTSRTSDPSATQSSSSITRNSFELSNWPQNHHQY*
>LsWRKY52	>Lsat_1_v5_gn_7_92541.1	MAKRSSGLSFDSDPIRLLFPHKLTAINSFPDHRSTTWRPMEAATATGNVNTSSSSPPPPPPTTIQFPLNLNCNLHDQHHHHHHPHKQINEMDFFSDKTHDVEEEEDRSRLQPVSSSDPPPPVTELDFNINTGLHLVTGNTSSDQSVVDDGISPNSEDKRAKNELAVVQAELERMNTENQRLREVLDQVTMNYNTLQTHLVTMMQQKQSHEEQSNEDHKIASNEGGGSEAATMVPRPFMDLGLAAPTAAETEEISQSSSDEHSRSPPLHTNSNIDQREESPDQQVIRAGNSNKVPRLSSSKNNNTTNIDQATEATIRKARVSVRARSEAPMIADGCQWRKYGQKMAKGNPCPRAYYRCTMAAGCPVRKQVQRCAEDRTILITTYEGNHNHPLPPAAMAMA…
>LsWRKY53	>Lsat_1_v5_gn_8_103681.3	MASSGGSLNTSTTTSQYPPFSFSTSFSDLIASNTGEDPNWGFFSGGGGGGGGGGESPKPTPTPFSPSAFLSTPTGLNQNQFLDSPFFPFNSNIVPSPTTGSFSGLDFKDEERTYSNFSFQSQARPLASMASIKMEEQVKTQPQQWGKQTDFTSEINKNKSESTQSVQTQYVSDPSQAVKDQTRLEDGYNWRKYGQKQVKGSENPRSYYKCTFPNCPTKKKVERNLEGHITEIVYKGNHSHAKPQNAKKSSSNSYSEAPIESNHFDSSASFGEDEFEQGSSISKSGDDHENEPEAKRWKGETESEAISGPGSRTVREPRIVVQTTSDIDILDDGYRWRKYGQKVVKGNPNPRSYYKCTFNGCPVRKHVERASHDLRAVITTYEGKHNHDVPAPRGSGSYA…
>LsWRKY54	>Lsat_1_v5_gn_8_147781.1	MLNFVEVFPYNFSSSTSLTAASSNLSLNLMKDNSKTTYSDYNNSHNQLEDDTELDLIGKNPKCSSHEVVVDHVPPTTSSGIGNSEGNDFNSVSGSKLINTIKKGEKKIKKAKCAFQTRSQVDIIDDGYRWRKYGQKAVKNSKFPRSYYRCTYQECNVKKQVQRLSKDEGVVVTTYEGTHSHPIEKSTDNFEHILTQMQIYSSC*
>LsWRKY55	>Lsat_1_v5_gn_8_166820.1	MDTKELMMMMMIKMENQNNPYPPHIHMDIDIPSDPFSSLPVLDQTAFGSEQKTSLGFMELLQGGFHDHNYSSPSSSSSIFDINNMMMMYHHDHQLPSPPSSSSAHPHSNQHDHDHNHYKEEDVTVDEVAGEESSISVVLNVAHPSISSPNSSSLSSPQPAAAASVDQCMGSKRTKVDGDDEKKTLKKKKKEREARFAFMTRTEIDHLDDGYRWRKYGQKAVKNSPFPRSYYKCTSASCNVKKRVERCMGDPSFVVTTYEGQHIHPSPSPSPSPSAAPTLKIPSFNHHLNNNIIINPTTYN*
>LsWRKY56	>Lsat_1_v5_gn_8_47440.1	EVNNLDDPTLSFSPFHLTFHTSQRTFFLRVIILTHSLSPKTLNSLSKSFFKSPLLHRNQYMDDDSSIDPLSGDSTWTLPGDYSFFGITDTRDNNILSEFGWNFHPPAPVLDRMDSGGSCGVPEEINPTTSPVPVHSQVGSVENVRDVSMSNPLVSTSSSEDRPESSAASGDAASGGQPPSSDTGGKVKKKGPKRIRQQRFAFMTKSEIDHLEDGYRWRKYGQKAVKNSPFPRSYYRCTNSKCTVKKRVERSSTDPTTVITTYEGQHCHHTVGFPRGLLNHENAYSRLLASHHSTTHQVIYPRTPLPNLGTSKLQPKVESNEAADFNHRHSDEKPQESFQDSRLDHQGLLGDIIGIALQVIHQRLVDF
>LsWRKY57	>Lsat_1_v5_gn_8_48640.1	MDENRGLSLSVPSTRPSITLPPRSTVETLFAGGGSGPGASPGPMTLVSNFFSENDPDSDCRSFSQLLSGAMLSPAEIPDRRPSSHLDIRHSYSNKESVNSGGGGGGGGGGGNVDFQFSNNGRPSSLVVTQPSMFTIPPGLSPATLLDSPGFFPQTQASLGMSHQQALAQVTAQASSLPQIHSFTSTAATYHRLPPAKPDHNTAKDSSDFSNSDNRYYPSSIAVDKPADDGYNWRKYGQKQVKGSEYPRSYYKCTHPNCPVKKQVERSVEGQVTEIIYKGQHNHQPPQSKRGKDSSNGTSSVNEHKFEGQIGNFNHSLMKDQESSQATYEHSGSSDSEEVGNDVSRVDERHEDEPQQKRRNIEARGVDPVSSHRGVTEPRIIVQTTSEVDLLDDGYRWRK…
>LsWRKY58	>Lsat_1_v5_gn_8_6060.1	MDHKRVVYELTQGKEFAEELKIHLNNPSSSQETQEILIHNILNSYENSLSLLTNHVLTTNGSNDEPHLHGKKGIIRKMESQVPFSESPCSEDSDPEFKDLDPNDFGAKRKRNGGIEKWKKQVKVRGEMEFEEALDDGYNWKKYGQKDILGAKHPRGYYRCTYRQLQGCLATKQVQRTNEDPNIFNMTYQGIHTCHPATATDTPPTLPLPSSSSPPPKIQHPPPQNQLLGSPKILQTDRKAITKNLETHYSAHFPSTSNNNFVFPTPNSTSDGNETPSFITPTTLGSTYFMMSQPQVSMCEINENIVGVESELNDIVSAATSSTSFHNADLPLPFGELEFGSTFSFDNSIFFD*
>LsWRKY59	>Lsat_1_v5_gn_8_63280.1	MDDDSDRSSEATQLEENTTAEDTMHHDDDDDDDQSDATPLQYSSMSPEEDSATSQSLTLAVSDLSEVPIKYEMQRDELERLKNQLQGSHQEALATVIAQAARARSRIQISNSQGQIQLNNADVAEAKQNNTIDVPRSLSASHNVKTQIDGYNWRKYGQKQVKSPQGSRSYYKCTYSNCDAKKMESCDEYNSVTKLVYKGQHKHDPPTKIVSNGSKILSTPKRKSISTPGLKLSNSQQNQRVKKSKSSGESHDCVLKNPKKPKFIVHAADDVEISADGYRWRKYGQKMVKGNPHPRNYYKCTCAGCGVTKHIEKAIDGTSNIVITYKGVHDHDKPVPKKRRGHPHPHAHAHAHGVVTFSPSSNMLSTQVSGAESVKRIESTPTLVSVGFEIK*
>LsWRKY60	>Lsat_1_v5_gn_8_6481.2	MDDEWDLHAVVRSYTTISTDATTAASGTNTTTSDDGFDMVETVASGNEIYQFSYSNTGENQSEGLEEVYKEGCSQRLGTTATAVVSGDDEQLPVFDGSCDSFSNETPSRKRKNQQKKVVVELTQEELCSDTWAWRKYGQKPIKGSPFPRNYYKCSTTKACGARKQVEQSHVDPTVFIVSYSGEHMHPRPTHRSPLAGSTRSNKSTMAHLPPPISDDCP*
>LsWRKY61	>Lsat_1_v5_gn_8_68740.2	MAVDLVGVQTLEHLNRMFQLTNHDFAVSSNFNQAVSALKRTGHARFRRGPSSSSSSSDSHGPSTSTQSAPAFIRSTEASNEWCFGKSVTDMTTSSSSRSTNSSSLVSPLAIGEEATVSNVAPAPAFSSRKPPLPSSHRKRCRADRPSVSLQGSGTKHHSVSRSGCHCCKRRKTASKREIRRVPITGSKVTTIPADDFSWKKYGEKSVDGSRYPRVYYKCNTGKGCPARKSVELALDDSKMLLVTYDGEHIHHHDPSPILTGLTGAVVQSK*
>LsWRKY62	>Lsat_1_v5_gn_8_91621.1	MEEVEAANRAAVESCHKILSLLAQPQDQVQYKNLMVQTGDAVVRFNKVVSLLDNGLGHARVRMVKKISTPVPQNILLDTPTTITTHHHPPKPLQLLLDSHPIQEVGSNVVKSTLSLANHHHPSLELNSNGKCSIQVSQNTPHPSSNYHFLQQQKLKQQAEMMYRRSNSGISLNFDSSTCTPTMSSNRSFMSSLSIEGSVANLDGSSFRLIGSTRSADQASYQHKRRCSVRGDDGSVKCGSSGRCHCSKKRKHRIKRSIKVPAISNKLADIPPDEYSWRKYGQKPIKGSPHPRGYYKCSSMRGCPARKHVERCLEDSTMLIVTYEGEHNHPRLPSQSANA*
>LsWRKY63	>Lsat_1_v5_gn_9_104500.3	MMHSAMLKSSGYLKLTGGSYGKNQASLSDQERNFQSVMTKDSDDIHLGSGTHTLHSNQEGSSSPISVNQEKTIATSEQNPSPKEGNFVVNVSKSPEKPTVDGFNWRKYGQKLVRDNAFVRSYYKCTYAKCPARKQVEHSHDGHIKEINYLCKHQHPKPNHSSETLNENFVEFEMLQTNETEIGVDNNAPQLKRQKKESDNVVTKTNYEPRVVVETKSVVDIVNDGYRWRKYGQKMVKNSPYPRSYYRCSNAGCPVKKHVERASHDEKVVITTYEGRHDHDMPSGIRNVTQNVKENNNGTMDDDGNDHDDDDDDDDDNDGDGDGDDPQPQPKTNESKGPKKHRKY*
>LsWRKY64	>Lsat_1_v5_gn_9_106981.1	MDAEADSAGNTTASSSHSPTTIQFPVNLTGTASDDQNKQMMDFFADRKDVDEQSKFDCDTSDHLHRNINTGLHLLTRSTSNDHSVSDDGMSLTNSKRTKNEVIHHYIQQLEEEKSENQRLKQELNQANLNYNTLLTKVIRQKQEKNLDEYRKPNIDGGGGGEIPFIGLADPTTVETDENSRSSSDELHRKSINNIIGKDQREESPEQALICSNKVMRLNDLKNDGDCNIDQATEATIRKARVSVRARSEAPMITDGCQWRKYGQKMAKGNPCPRAYYRCTMAVGCPVRKQVQRCAEDRTILITTYEGNHNHPLPPAAMAMSSTTSSAARMLLSGSMPSSDGIINPNFLARTLLPCSSNIATISASAPFPTVTLDLTQSPPLGQQQNFAGQNGALLPQIF…
>LsWRKY65	>Lsat_1_v5_gn_9_14580.1	MSSFSDQAPAPRTGGLAARIAERVGSGVPKFKSIPPPSLPISPPAVSPSSYFAIPAGLSPADLLDSPVLLSSSHILPSPTTGSFPFQAFNWKNLSSNNQNHEQSIKKEQKSFTDFSFQQQSNHLTEQLWNHQKSREQDEKAFVQSEHASQFQSFSPEISTIQTDSNSQTQSFQSGYAASNNNLNNQPSQKKSDDGYNWRKYGQKQVKGSENPRSYYKCTYPNCSMKKKLETNLDGQITEIVYKGNHNHPKPQSTRRSSSSSSASNHLQMTQVSSNHELLDYPDQSYGSHGSGQFDSVATPENSSISDDLDRSSCQRSRSGGDEFDEDEPDAKRWRASENEGISTIGGTRTVREPRVVVQTTSDIDILDDGYRWRKYGQKVVKGNPNPRSYYKCTSSGCS…
>LsWRKY66	>Lsat_1_v5_gn_9_2661.2	MSPTILQMFRLPRKGKKAAEKIVVTVKLEENEGKKRSENSSSCDCWSWRKYGQKPIKGSPYPRFIQHYPLLLTLETGYYRCSTSKSCSAKKQVELCRTDASMLIITYTSTHNHPDPTLPKKPKTKILHDSISETNTAPDPLDQENENQKPVTTIAVEDEDATTCTENDNFHYIQTPEDETRLTLNLENTFFDEEPLSYPNLMTFSAPKTEENDFYDELEELPMSSSSFKIFMRSNFFEERVLVQPP*
>LsWRKY67	>Lsat_1_v5_gn_9_33061.1	MKESEACNWSQGFEDDLLRELLYDESPYVLSPQEIAGDPDNYSVNKLISSIYSGPTITDIGKALVASSYTNNTPELSALTRISDMERGVSRVENKYVLKVKCSGNVMADDGYKWRKYGQKSIKNSSNPRSYYKCTNPRCGAKKQVERSNDDPDTLIITYEGLHLHYMYPFFMFGQSDNPDPPTKKFRTLNFEQDAHQNYQQPTKDMDENTRHFCLDHQPPTMIKDFQEESIDQEVAICSQGLLEDMVPLVIRNPMIYTTNSSTSCSSSSSHPSPPASPSFSWSPKY*
>LsWRKY68	>Lsat_1_v5_gn_9_36381.1	MNSFGGRLNTRFSFDNSSRSLVSNDNKNEERKWDLFEFNNGVESPKQSFITPFYTSPFTSTNPNQFLDPPFFSFNSNIISSSGSYSDFHFKEEKANDTNLNFQSQIWPTSSSISGNKKEESTKSQALDWNVESQQKPTDFSIEISKTEPKSIQSPQSHSNFNSIQATNEQNRYQDGYNWRKYGQKQIKRSNNPQSYYKCTYPNCPTKKKVEKDLNGFITKIIYKEKHNHTMPTNFQKSSSNSFNNTIFEHSNRFQPYSECSFIEHEQELGSLICKSRIDHENEPEAKRWKLDEVESEVISSSLSKTLEEPRLVVETKSDIDILDDGYKWRKYGQKVVKGNMNPRSYYKCTYVGCRVRKLVERASHDFQSVITTYEARHNHSVPMPRRGGNYAINQASTS…
>LsWRKY69	>Lsat_1_v5_gn_9_38660.1	MDSRSWPEGSPCRRSKATQELIQWPENSYCVEDQALDIFGNTLSFMSSYSVNKVSKIPINNISSNCLDGRRSIATDKMVKTVKNSRGCYIRKRSWTSTKVTSLIDDGHVWRKYGQKEIINAKHKRNYYRCTHKFDQGCQATKQVQQTEHEPTKYKITYNRHHICNNFLSTPQMIYDSINLEDTSILLSFESNGLVDKEQVGSHFPSYLHDKSKEALSFSELTDNQPLCSLPSNLIMSDQSAPSLRSTRLAHGDVISKEVYSPIFEMDQILETIDYSENPFDLAHCELISLNYSFNV*
>LsWRKY70	>Lsat_1_v5_gn_9_38680.1	MESPTWPESSQSNRIKAIQELTNGQEWTNKLQEALWCPENFESDPTSIDGVLLQILEMFEKTISIMGSSSINNATLDHLLTSDLHSSASLGKPKSENINESPNSVIPVKIKKRCVKRRKSSWTSTKVTSDLIDDGHAWRKYGQKEILNANHQRSYYRCTYKSDQGCLATKQVQMIEDKPPKYRITYFGNHTCNNLQRAPPIILDSPDPRDESIILNFETKELIKKKHLHPNFLSIKQELKDGFPSLSSLGGNPSSSCNNDPPWGPFTHVPQDPTESVSLMSSWLDHEEMVSPRAYSGLDRGDIIS*
>LsWRKY71	>Lsat_1_v5_gn_9_39381.1	MDQTATWPESLPSDRIKAFHELIQGKELTNNLREMLQWPRKIECNPTYEDGLVMQIIAMFKNTLLILGSCTSNQHLEIPTSDMCLSYSSDGQKSENSGKNEGNIIPAKRKKGCHKRRKNSWTSSQVTSTLVDDGHAWRKYGQKHINNTNHQRSYYRCTYKFDQGCLAAKQVQKIQDKPPKYKTTYMRNHTCQNLQRAPEIILDSLNSKDTSILFNFETKGLIARTRVGTFFPSIKHEQKESYPSHGNLRNEEYSFANDLHCALNACVSNNPFEPNI*
>LsWRKY72	>Lsat_1_v5_gn_9_39460.1	MESSCWPESLPSNRIKAIQKLTQGQHLTSKLREMLRRSEKTEPDINSVDDVVGEILGMFDNTLSILNSSSFEEVPDMPIGDIRSPGSWDDQKSENYGESTKTLTPLKVKRGCYKRRKDSWTSIKITPRLIDDGHAWRKYGQKVILNAKHQRNYYRCTHKTDQGCRATKQVQMTEDEPPQYKITYSGHHTCNNLLRSPLIILDSPDHKDNSFVLSFEGTGLNNNKQVDSCFPSAKQDPKEGFPSLVFRHNEASSSDNYLPWDLTTQVPSEPMSMMSSGLDHEDMISSEVYSSTCSTHGYEIDNIIGSNIFGDFPFEMCS*
>LsWRKY73	>Lsat_1_v5_gn_9_42560.2	MKHALNYQNLSTMDAFFQPTGLCLSQDQTGNPYSWSSSLNYTFSNTDDQINHFDIDVMLHNCHNLYPNNNNPNPNLPQFIDPPSYQDSSSSNFPAYISTNEQTPILLEMTTAANASESSDISAYATCTPQANLFHRQALVSDMCNGERLHDGTKIAFRVRTELEVLDDGYRWRKYGKKKVKSSPNLRNYYKCYTAGCKVKKRVERDRNDSRYVIATYIGRHNHRAQSTIPCNPTGVWTLQF
>LsWRKY74	>Lsat_1_v5_gn_9_49041.1	MSEKEENGGDCGEDDDEWRDLIATPNRLISDDFFVLKSEKLDDREEDIGKGNDGSSSEDRDRVRGRRVSIAERRAAMRGNSDTNASSIRVSVSSSRVTAWPPILTIPCGISPTSLLDSPVLLPNSQASPTTGSFQYPPPLSQEEILGMKSELDDMNCDTSSFIYQPDGGSLSWPSFSQVQNQPPLMCEHPGALMEETVTKGSSDGFKVPKSTIAGVKQDDDSKRHMDGYQKETSFSNMRNSEDGYNWRKYGQKQVKGSEYPRSYYKCTHPNCQVKKKVERSHDGHITEIIYKGAHNHQIQGHRSNINGSPDANGSYVKIEERDNISIHPEWNTDRMDRSSSTSVGIDNPDLISPPKGKSIGIIESNPNYDYNEEDGTNIGTHSPGDDADEDKSDLKRRK…
>LsWRKY75	>Lsat_1_v5_gn_9_60201.2	MEETSSPNKKRLIAELIKGRDSTKKLQNLLRRKVDDDDGSVSADDLVMKILGSFSDSLSVLSSCGSAVLCPVPVSMYVGSSCSGDRTCDSGESEKKPAPAVKDRRGCYKRRKTEDSRVKIVDTIEDGYAWRKYGQKEILNAKFPRCYFRCTHKTEGCKALRQVQKLEDGSQMFHITYYGNHTCQNTNKNTHMFSDSGALSFFLHNFKDSNTNNLPSSPSTITNVHNTPSLEQEDDSNVQSDEHISSSNYGQSSIASWNDIFDHGSSMDDLKFDDANVILKAIWNCGVDNVSCRHSFTFGFIKRFWDILEYLILPLQEEGFSNWITYGTPQSIRCTIKNMVSFPIRKFSQTALSQTETI*
>LsWRKY76	>Lsat_1_v5_gn_9_9681.1	MDEVEAANKAAVESCHRILNLLAQPQDHVQSKNLMLQTGEAVVRFKKVVSLLDDGLGHCRVRKLKKTQNLIPQNILLDSTPVQEPLKPHQFLLTPPNQTHPIQEIGSNGVKNTLSLVNHKPSLELSTTGKNPIQISQQNPNPNSNYQFLQHHHHHQQQAQLQLKQQAEMMYRRSNSGINLNFDNAPTISSNKSFISSLSMEGSVTTLDGSSFHLIGSSRSTDQATYQHKPRCSARGDDGSTKCGSSGRCHCSKKRKHRVKRSIKVPAVSNKLADIPPDEYSWRKYGQKPIKGSPHPRGYYKCSSMRGCPARKHVERCLDDSTMLIVTYEGEHNHTRLPSQSANT*

## Sheet: Table S8
Table S8 Cq data of qRT-PCR experiment in analyzing responses of lettuce LsWRKYIII genes to different abiotic stresses
LsWRKY09	Cq data	Cq data	Cq data	Cq data	Cq data
12 h	CK	drought	salt	low temperature	high temperature
	24.41	23.24	23.8	26.67	26.7
	24.44	23.05	23.86	26.54	26.7
	24.47	23.14	23.99	26.47	26.62
24 h	26.88	26.41	32.14	31.52	28.69
	26.88	26.39	32.4	31.44	28.9
	26.88	26.45	31.4	31.04	28.7
LsWRKY12	CK	drought	salt	low temperature	high temperature
12 h	25.76	23.35	23.25	25.68	24.47
	25.59	23.55	23.17	25.38	24.44
	25.38	23.34	23.05	25.57	24.5
24 h	27.03	25.34	36.77	31.7	29.7
	27.18	25.23	35.5	31.23	30.08
	27.21	25.28	34.17	31.18	29.63
LsWRKY39	CK	drought	salt	low temperature	high temperature
12 h	27.11	25.43	24.93	24.68	31.89
	26.96	25.65	25.09	24.87	31.44
	26.65	26.03	24.87	24.77	31.32
24 h	27.11	26.4	35.2	32.01	29.44
	26.96	26.59	36.28	31.82	28.83
	26.65	26.76	39.71	31.23	29.2
LsWRKY51	CK	drought	salt	low temperature	high temperature
12 h	25.51	24.13	24.21	27.95	26.91
	25.73	24.21	24.3	27.88	26.84
	25.65	24.17	24.37	27.87	26.76
24 h	25.51	26.44	32.13	31.78	30.06
	25.73	26.44	31.59	31.88	29.91
	25.65	26.53	32.32	31.99	29.59
LsWRKY58	CK	drought	salt	low temperature	high temperature
12 h	30.27	29.26	29.62	31.08	30.44
	29.6	29.75	29.12	30.23	30.3
	30.08	29.44	28.7	30.61	30.56
24 h	30.27	28.56	30.16	29.95	31.24
	29.6	28.73	30.76	30.45	31.16
	30.08	28.91	31.24	29.64	30.26
LsWRKY69	CK	drought	salt	low temperature	high temperature
12 h	27.3	26.53	28.68	25.83	30.75
	27.47	26.5	28.66	25.68	30.85
	27.22	26.46	28.43	25.7	30.17
24 h	27.76	27.85	35.23	31.9	32.48
	27.86	28.06	33.84	32.67	31.43
	27.67	28.24	35.75	32.65	31.25
LsWRKY70	CK	drought	salt	low temperature	high temperature
12 h	28.18	26.5	28.06	28.04	30.35
	28.22	26.76	28.27	28.04	29.87
	28.32	26.64	28.13	28.27	29.94
24 h	28.18	30.02	37.96	33.2	30.51
	28.22	29.57	36.68	32.96	30.57
	28.32	29.72	37	32.94	30.84
LsWRKY71	CK	drought	salt	low temperature	high temperature
12 h	24.55	25.11	25.79	27.11	31.43
	24.45	25.24	25.91	26.69	31.4
	24.72	25.01	25.81	27.02	32.04
24 h	24.55	27.7	36.13	33.46	32.28
	24.45	27.58	35.7	32.94	32.22
	24.72	27.54	36.23	33.19	32.01
LsWRKY72	CK	drought	salt	low temperature	high temperature
12 h	22.98	21.34	22.92	22.58	26.7
	23.06	21.38	23	22.69	26.42
	23.1	21.44	23.01	22.73	26.69
24 h	22.98	26.11	31.37	29.33	28.41
	23.06	26.09	31.38	29.6	28.61
	23.1	26.22	31.33	29.1	28.34
LsWRKY75	CK	drought	salt	low temperature	high temperature
12 h	25.74	23.67	24.17	25.81	24.37
	25.7	23.57	24.17	25.71	24.46
	25.69	23.68	24.07	25.86	35.57
24 h	25.74	26.28	33.35	30.97	27.58
	25.7	26.28	32.76	31.25	27.74
	25.69	26.21	33.71	31.17	27.83
LsTIP41	CK	drought	salt	low temperature	high temperature
12 h	22.63	21.54	21.5	23.2	23.02
	22.73	21.7	21.51	23.25	23.13
	22.66	21.62	21.62	23.24	23.01
24 h	24.49	23.64	28.21	26.54	26.61
	24.46	23.84	29.08	26.35	26.44
	24.65	23.76	28.74	26.37	26.47

## Sheet: Table S9
Table S9 Cq data of qRT-PCR experiment in analyzing responses of lettuce LsWRKYIII genes to different hormone treatment.
LsWRKY09	Cq data	Cq data	Cq data	Cq data
12 h	CK	ABA	GA	SA
	24.41	24.43	23.97	22.16
	24.44	24.47	24	22.21
	24.47	24.37	24	22.33
24 h	24.41	27.77	26.28	25.04
	24.44	27.7	26.36	24.96
	24.47	27.73	26.54	24.91
LsWRKY12	CK	ABA	GA	SA
12 h	25.76	25.36	25.74	24.07
	25.59	25.5	25.85	23.91
	25.38	25.48	25.52	23.97
24 h	25.76	28.64	27.07	24.01
	25.59	28.45	27.08	24.02
	25.38	28.72	26.99	23.87
LsWRKY39	CK	ABA	GA	SA
12 h	27.11	26.91	28.33	25.58
	26.96	27.24	28.88	24.98
	26.65	27.09	28.64	24.9
24 h	27.11	28.63	29.69	25.94
	26.96	29.13	29.7	25.95
	26.65	28.98	29.39	26.56
LsWRKY51	CK	ABA	GA	SA
12 h	25.51	26.14	26.26	26.31
	25.73	26.31	26.5	26.19
	25.65	26.4	26.41	26.32
24 h	25.51	28.17	27.33	25.26
	25.73	28.14	27.35	25.26
	25.65	28.37	27.48	25.41
LsWRKY58	CK	ABA	GA	SA
12 h	30.27	30.35	29.57	28.97
	29.6	31.07	30.76	29.12
	30.08	30.91	30.02	28.59
24 h	30.27	30.52	30.28	30.8
	29.6	30.82	30.86	30.96
	30.08	30.86	30.56	30.67
LsWRKY69	CK	ABA	GA	SA
12 h	27.3	24.93	24.02	25.11
	27.47	24.97	24.11	25.12
	27.22	24.92	24.02	25.06
24 h	27.76	31.79	27.29	26.43
	27.86	30.63	27.24	26.47
	27.67	30.85	27.27	26.35
LsWRKY70	CK	ABA	GA	SA
12 h	28.18	31.71	28.51	24.34
	28.22	31.55	28.37	24.38
	28.32	32.3	28.63	24.45
24 h	28.18		29.43	27.18
	28.22	36.51	29.28	27.18
	28.32	35.77	29.1	27.57
LsWRKY71	CK	ABA	GA	SA
12 h	24.55	24.16	25.49	22.74
	24.45	24.12	25.63	22.77
	24.72	24.15	25.52	22.72
24 h	24.55	28.6	24.95	24.87
	24.45	29.12	24.8	24.8
	24.72	28.63	24.7	24.67
LsWRKY72	CK	ABA	GA	SA
12 h	22.98	23.75	22.56	23.16
	23.06	23.87	22.69	23.19
	23.1	23.86	22.73	23.24
24 h	22.98	28.7	25.71	23.33
	23.06	28.8	25.67	23.26
	23.1	28.73	25.86	23.33
LsWRKY75	CK	ABA	GA	SA
12 h	25.74	24.64	24.4	22.6
	25.7	24.53	24.43	22.49
	25.69	24.51	24.49	22.43
24 h	25.74	29.49	26	24.32
	25.7	29.82	26.12	24.26
	25.69	29.44	25.97	23.94
LsTIP41	CK	ABA	GA	SA
12 h	22.63	22.81	22.88	23.15
	22.73	22.9	23.02	23.2
	22.66	22.86	22.97	23.16
24 h	24.49	25.83	24.77	26.26
	24.46	25.98	24.84	26.32
	24.65	25.87	25.01	26.1

## Sheet: Table S10
Table S10 Cq data of LsWRKY TF involved in different tissues by qRT-PCR analysis
LsWRKY09	Cq data of Root	Cq data of stem	Cq data of leaf
	30.03	30.99	29.08
	30.06	30.76	28.48
	29.78	30.76	28.55
LsWRKY12	Cq data of Root	Cq data of stem	Cq data of leaf
	28.03	25.93	26.18
	27.61	25.85	26.4
	27.61	25.73	26.42
LsWRKY39	Cq data of Root	Cq data of stem	Cq data of leaf
	23.64	25.16	25.82
	23.63	25.14	25.85
	23.6	25.06	25.66
LsWRKY51	Cq data of Root	Cq data of stem	Cq data of leaf
	27.71	26.09	28.43
	27.63	26.18	27.95
	28.08	26.3	27.85
LsWRKY58	Cq data of Root	Cq data of stem	Cq data of leaf
	28.27	28.44	30.28
	28.25	28.37	29.81
	28.37	28.82	31.39
LsWRKY69	Cq data of Root	Cq data of stem	Cq data of leaf
	32.64	30.37	31.69
	32.45	29.95	31.55
	33.21	29.93	31.84
LsWRKY70	Cq data of Root	Cq data of stem	Cq data of leaf
	29.18	27.71	29.45
	29.05	27.96	29.83
	29.34	28.14	29.7
LsWRKY71	Cq data of Root	Cq data of stem	Cq data of leaf
	27.31	30.79	31.57
	27.57	30.56	31.93
	27.58	30.49	32.03
LsWRKY72	Cq data of Root	Cq data of stem	Cq data of leaf
	29.07	27.71	26.61
	29.81	27.72	26.47
	29.66	27.79	26.48
LsWRKY75	Cq data of Root	Cq data of stem	Cq data of leaf
	26.81	25.61	29.18
	26.69	25.65	29.18
	26.56	25.48	29.11
LsTIP41	Cq data of Root	Cq data of stem	Cq data of leaf
	22.25	21.85	23.46
	22.23	21.94	23.61
	22.34	22.02	23.65

[truncated: 2 more sheets: Table S11, Table S12]
